# Supplementary material
Source: publisher site journal article supplement (https://www.spandidos-publications.com/4914/downloadSupplementary)
Supplement: Supplementary file 1 [file downloadSupplementary]

## Sheet: Summary_targets
Table SV. Target genes of seclected tRFs.
tRFs	Seqname	GeneSymbol	Type	Diagrams	Total	Context+	Structure	Energy	6mer-1a	6mer	7mer-1a	7mer-m8	8mer-1a	8mer-1u	Imperfect	UTR Length
tRF-1:32-Glu-TTC-2	ENSMUST00000040496.5	Bmp8a	Coding	Click Me	1	-0.189	142	-10.74	0	0	0	1	0	0	0	622
tRF-1:32-Glu-TTC-2	ENSMUST00000030872.11	Orc5	Coding	Click Me	1	-0.198	140	-13.23	0	0	0	0	0	1	0	997
tRF-1:32-Glu-TTC-2	ENSMUST00000053855.7	Ddit4l	Coding	Click Me	1	-0.28	155	-16.39	0	0	0	0	1	0	0	2012
tRF-1:32-Glu-TTC-2	ENSMUST00000040248.8	Spidr	Coding	Click Me	1	-0.145	146	-15.42	0	0	0	0	0	1	0	4692
tRF-1:32-Glu-TTC-2	uc008kxg.1	AK039132	Coding	Click Me	1	-0.115	148	-13.15	0	0	0	0	1	0	0	3169
tRF-1:32-Glu-TTC-2	ENSMUST00000027929.9	Mark1	Coding	Click Me	1	-0.156	142	-14.14	0	0	0	0	0	1	0	2100
tRF-1:32-Glu-TTC-2	ENSMUST00000036340.11	Fancd2	Coding	Click Me	1	-0.186	143	-11.25	0	0	0	1	0	0	0	1060
tRF-1:32-Glu-TTC-2	ENSMUST00000179322.1	Evi2b	Coding	Click Me	1	-0.255	148	-13.31	0	0	0	0	0	1	0	2028
tRF-1:32-Glu-TTC-2	ENSMUST00000034277.13	Emc8	Coding	Click Me	1	-0.166	143	-12.73	0	0	0	0	0	1	0	4175
tRF-1:32-Glu-TTC-2	ENSMUST00000032371.7	Gys2	Coding	Click Me	1	-0.209	143	-11.61	0	0	0	0	0	1	0	247
tRF-1:32-Glu-TTC-2	ENSMUST00000186641.6	Ano7	Coding	Click Me	1	-0.136	141	-10.74	0	0	0	1	0	0	0	1277
tRF-1:32-Glu-TTC-2	ENSMUST00000047786.5	March4	Coding	Click Me	1	-0.162	150	-10.31	0	0	0	1	0	0	0	1535
tRF-1:32-Glu-TTC-2	ENSMUST00000114575.3	Vma21	Coding	Click Me	1	-0.314	142	-10.22	0	0	0	0	1	0	0	3759
tRF-1:32-Glu-TTC-2	ENSMUST00000059571.6	Pcdhb19	Coding	Click Me	1	-0.132	146	-15.94	0	0	0	0	0	1	0	4568
tRF-1:32-Glu-TTC-2	ENSMUST00000088217.11	Tbl1x	Coding	Click Me	1	-0.237	148	-13.43	0	0	0	0	1	0	0	3242
tRF-1:32-Glu-TTC-2	ENSMUST00000067458.6	Sema5a	Coding	Click Me	1	-0.126	149	-13.31	0	0	0	0	0	1	0	6926
tRF-1:32-Glu-TTC-2	ENSMUST00000070080.5	B4galt6	Coding	Click Me	1	-0.114	153	-12.24	0	0	0	0	1	0	0	3722
tRF-1:32-Glu-TTC-2	ENSMUST00000061111.9	Marveld1	Coding	Click Me	1	-0.15	149	-14.72	0	0	0	0	0	1	0	2306
tRF-1:32-Glu-TTC-2	ENSMUST00000093113.4	Adamts18	Coding	Click Me	1	-0.155	145	-12.48	0	0	0	1	0	0	0	1843
tRF-1:32-Glu-TTC-2	ENSMUST00000146243.1	Zscan29	Coding	Click Me	1	-0.211	145	-12.18	0	0	0	0	1	0	0	1272
tRF-1:32-Glu-TTC-2	ENSMUST00000099123.4	1700034I23Rik	Coding	Click Me	1	-0.232	142	-10.35	0	0	0	0	0	1	0	1688
tRF-1:32-Glu-TTC-2	ENSMUST00000052725.14	Sc5d	Coding	Click Me	1	-0.107	140	-13.74	0	0	0	0	0	1	0	3909
tRF-1:32-Glu-TTC-2	ENSMUST00000006632.7	Zdhhc24	Coding	Click Me	1	-0.11	148	-14.28	0	0	0	0	0	1	0	1626
tRF-1:32-Glu-TTC-2	ENSMUST00000056972.5	Cmtr2	Coding	Click Me	1	-0.227	147	-14.03	0	0	0	0	0	1	0	1127
tRF-1:32-Glu-TTC-2	ENSMUST00000037434.12	Cacna2d4	Coding	Click Me	1	-0.333	145	-13.84	0	0	0	0	1	0	0	5109
tRF-1:32-Glu-TTC-2	ENSMUST00000161254.8	Nwd1	Coding	Click Me	1	-0.159	140	-10.62	0	0	0	0	0	1	0	6169
tRF-1:32-Glu-TTC-2	ENSMUST00000024984.6	Tmem204	Coding	Click Me	1	-0.116	149	-12.48	0	0	0	1	0	0	0	1219
tRF-1:32-Glu-TTC-2	ENSMUST00000037636.3	Ina	Coding	Click Me	1	-0.17	140	-12.8	0	0	0	0	0	1	0	1677
tRF-1:32-Glu-TTC-2	ENSMUST00000111393.7	Ncor2	Coding	Click Me	1	-0.269	151	-14.12	0	0	0	0	1	0	0	1012
tRF-1:32-Glu-TTC-2	ENSMUST00000113314.2	Sult1d1	Coding	Click Me	1	-0.187	144	-10.7	0	0	0	0	0	1	0	3742
tRF-1:32-Glu-TTC-2	ENSMUST00000169570.7	Ctbp2	Coding	Click Me	1	-0.131	140	-11.14	0	0	0	0	0	1	0	3962
tRF-1:32-Glu-TTC-2	ENSMUST00000101102.1	Reps2	Coding	Click Me	1	-0.114	145	-11.26	0	0	0	0	0	1	0	5589
tRF-1:32-Glu-TTC-2	ENSMUST00000146623.7	Gpd1l	Coding	Click Me	1	-0.102	150	-16.06	0	0	0	0	0	1	0	3067
tRF-1:32-Glu-TTC-2	ENSMUST00000010421.6	2610507B11Rik	Coding	Click Me	1	-0.16	144	-12.53	0	0	0	0	0	1	0	690
tRF-1:32-Glu-TTC-2	ENSMUST00000086083.10	Ncor2	Coding	Click Me	1	-0.269	151	-14.12	0	0	0	0	1	0	0	1005
tRF-1:32-Glu-TTC-2	ENSMUST00000216874.1	Tyk2	Coding	Click Me	1	-0.209	140	-10.35	0	0	0	0	0	1	0	979
tRF-1:32-Glu-TTC-2	ENSMUST00000113322.8	Foxp1	Coding	Click Me	1	-0.1	152	-16.48	0	0	0	0	1	0	0	4748
tRF-1:32-Glu-TTC-2	ENSMUST00000107253.7	Rfx5	Coding	Click Me	1	-0.216	140	-10.35	0	0	0	0	0	1	0	3410
tRF-1:32-Glu-TTC-2	ENSMUST00000075296.3	Mrgprh	Coding	Click Me	1	-0.247	151	-14.03	0	0	0	0	1	0	0	3486
tRF-1:32-Glu-TTC-2	ENSMUST00000058370.13	Ccdc137	Coding	Click Me	1	-0.124	140	-10.61	0	0	0	0	0	1	0	2624
tRF-1:32-Glu-TTC-2	ENSMUST00000115259.2	Tmem60	Coding	Click Me	1	-0.147	141	-10.35	0	0	0	0	0	1	0	4885
tRF-1:32-Glu-TTC-2	ENSMUST00000041826.13	Rnf13	Coding	Click Me	1	-0.13	146	-15.42	0	0	0	0	0	1	0	2553
tRF-1:32-Glu-TTC-2	ENSMUST00000084241.11	Wasf2	Coding	Click Me	1	-0.147	151	-16.61	0	0	0	0	0	1	0	4237
tRF-1:32-Glu-TTC-2	ENSMUST00000040880.8	Map6d1	Coding	Click Me	1	-0.26	145	-10.71	0	0	0	0	1	0	0	2653
tRF-1:32-Glu-TTC-2	ENSMUST00000179869.2	Hmgcs1	Coding	Click Me	1	-0.219	141	-10.22	0	0	0	0	0	1	0	1782
tRF-1:32-Glu-TTC-2	ENSMUST00000104930.1	Krtap1-3	Coding	Click Me	1	-0.209	142	-15.88	0	1	0	0	0	0	0	337
tRF-1:32-Glu-TTC-2	ENSMUST00000117919.7	Rerg	Coding	Click Me	1	-0.316	142	-10.64	0	0	0	0	0	1	0	1302
tRF-1:32-Glu-TTC-2	ENSMUST00000076623.7	Arap2	Coding	Click Me	1	-0.197	150	-14.65	0	0	0	0	0	1	0	1825
tRF-1:32-Glu-TTC-2	ENSMUST00000036300.12	Col27a1	Coding	Click Me	1	-0.136	140	-13.14	0	0	0	0	0	1	0	1683
tRF-1:32-Glu-TTC-2	ENSMUST00000058994.5	Tram1l1	Coding	Click Me	1	-0.265	140	-10.61	0	0	0	0	0	1	0	976
tRF-1:32-Glu-TTC-2	ENSMUST00000019512.7	Sec14l4	Coding	Click Me	1	-0.126	147	-15.25	0	0	0	0	0	1	0	1973
tRF-1:32-Glu-TTC-2	ENSMUST00000214206.1	Olfr810	Coding	Click Me	1	-0.105	149	-12.48	0	0	0	1	0	0	0	3360
tRF-1:32-Glu-TTC-2	ENSMUST00000135193.8	Lrch3	Coding	Click Me	1	-0.121	145	-14.28	0	0	0	0	0	1	0	3344
tRF-1:32-Glu-TTC-2	ENSMUST00000034074.7	N4bp1	Coding	Click Me	1	-0.243	152	-15.9	0	0	0	0	1	0	0	3552
tRF-1:32-Glu-TTC-2	ENSMUST00000046186.7	Spon2	Coding	Click Me	1	-0.26	148	-12.43	0	0	0	0	0	1	0	952
tRF-1:32-Glu-TTC-2	ENSMUST00000214454.1	Tyk2	Coding	Click Me	1	-0.209	140	-10.35	0	0	0	0	0	1	0	979
tRF-1:32-Glu-TTC-2	ENSMUST00000038562.8	Spsb1	Coding	Click Me	1	-0.169	140	-13.36	0	0	0	0	0	1	0	1931
tRF-1:32-Glu-TTC-2	ENSMUST00000221807.1	Zbed3	Coding	Click Me	1	-0.118	140	-10.91	0	0	0	0	0	1	0	1085
tRF-1:32-Glu-TTC-2	ENSMUST00000047906.9	Tiparp	Coding	Click Me	1	-0.175	149	-13.67	0	0	0	0	1	0	0	2378
tRF-1:32-Glu-TTC-2	ENSMUST00000210433.1	Gm32742	Coding	Click Me	1	-0.109	140	-10.65	0	0	0	0	0	1	0	3447
tRF-1:32-Glu-TTC-2	ENSMUST00000021652.4	Acot4	Coding	Click Me	1	-0.199	140	-11.31	0	0	0	0	0	1	0	4805
tRF-1:32-Glu-TTC-2	ENSMUST00000190729.1	Ak6	Coding	Click Me	1	-0.161	146	-11.97	0	0	0	1	0	0	0	1549
tRF-1:32-Glu-TTC-2	ENSMUST00000110384.8	Ripor2	Coding	Click Me	1	-0.15	149	-10.99	0	0	0	1	0	0	0	2131
tRF-1:32-Glu-TTC-2	ENSMUST00000179422.7	Ecsit	Coding	Click Me	1	-0.172	144	-10.57	0	0	0	1	0	0	0	531
tRF-1:32-Glu-TTC-2	ENSMUST00000117085.1	Abhd17c	Coding	Click Me	1	-0.11	141	-15.08	1	0	0	0	0	0	0	2906
tRF-1:32-Glu-TTC-2	ENSMUST00000165687.2	Tmem207	Coding	Click Me	1	-0.11	142	-10.35	0	0	0	0	0	1	0	4660
tRF-1:32-Glu-TTC-2	ENSMUST00000000129.13	Fer	Coding	Click Me	1	-0.209	140	-10.22	0	0	0	0	0	1	0	7508
tRF-1:32-Glu-TTC-2	ENSMUST00000105105.3	Hist1h3d	Coding	Click Me	1	-0.168	149	-14.45	0	0	0	0	0	1	0	3353
tRF-1:32-Glu-TTC-2	ENSMUST00000029633.4	Npy2r	Coding	Click Me	1	-0.219	154	-14.59	0	0	0	1	0	0	0	3317
tRF-1:32-Glu-TTC-2	ENSMUST00000143203.7	Stxbp4	Coding	Click Me	1	-0.151	149	-12.32	0	0	0	0	0	1	0	4108
tRF-1:32-Glu-TTC-2	ENSMUST00000033556.3	Pgr15l	Coding	Click Me	1	-0.194	140	-11.19	0	0	0	0	0	1	0	3729
tRF-1:32-Glu-TTC-2	ENSMUST00000080407.5	Zfp735	Coding	Click Me	2	-0.576	288	-23.73	0	0	0	0	1	1	0	1372
tRF-1:32-Glu-TTC-2	ENSMUST00000108021.1	Ptrh2	Coding	Click Me	1	-0.155	140	-16.68	0	0	1	0	0	0	0	2353
tRF-1:32-Glu-TTC-2	ENSMUST00000066469.13	Cope	Coding	Click Me	1	-0.145	150	-13.81	0	0	0	1	0	0	0	1911
tRF-1:32-Glu-TTC-2	ENSMUST00000033950.6	Gins4	Coding	Click Me	1	-0.126	140	-18.95	0	1	0	0	0	0	0	1883
tRF-1:32-Glu-TTC-2	ENSMUST00000215205.1	Olfr1211	Coding	Click Me	1	-0.235	147	-14.45	0	0	0	0	0	1	0	2502
tRF-1:32-Glu-TTC-2	ENSMUST00000040008.3	Ube2r2	Coding	Click Me	1	-0.217	155	-18.66	0	0	0	0	0	1	0	2584
tRF-1:32-Glu-TTC-2	ENSMUST00000047257.14	Katnal1	Coding	Click Me	1	-0.199	141	-17.09	0	0	1	0	0	0	0	5710
tRF-1:32-Glu-TTC-2	ENSMUST00000032315.2	Tas2r116	Coding	Click Me	1	-0.161	142	-12.98	1	0	0	0	0	0	0	50
tRF-1:32-Glu-TTC-2	ENSMUST00000054294.6	Fzd1	Coding	Click Me	1	-0.241	147	-10.99	0	0	0	1	0	0	0	3173
tRF-1:32-Glu-TTC-2	ENSMUST00000030110.14	Zdhhc21	Coding	Click Me	1	-0.129	142	-12.54	0	0	0	0	0	1	0	7591
tRF-1:32-Glu-TTC-2	ENSMUST00000086278.6	Zfp810	Coding	Click Me	2	-0.441	288	-22.6	0	0	0	0	1	1	0	4656
tRF-1:32-Glu-TTC-2	ENSMUST00000111300.7	Dedd	Coding	Click Me	1	-0.151	143	-11.25	0	0	0	1	0	0	0	1297
tRF-1:32-Glu-TTC-2	ENSMUST00000066295.3	Kcnk3	Coding	Click Me	1	-0.114	141	-10.47	0	0	0	1	0	0	0	4687
tRF-1:32-Glu-TTC-2	ENSMUST00000034115.4	Pou4f2	Coding	Click Me	1	-0.161	147	-11.04	0	0	0	0	1	0	0	1728
tRF-1:32-Glu-TTC-2	ENSMUST00000067743.1	Gm9949	Coding	Click Me	1	-0.363	150	-13.31	0	0	0	0	1	0	0	3013
tRF-1:32-Glu-TTC-2	ENSMUST00000009396.12	Tspan32	Coding	Click Me	1	-0.153	142	-12.54	1	0	0	0	0	0	0	747
tRF-1:32-Glu-TTC-2	ENSMUST00000224491.1	Nek10	Coding	Click Me	1	-0.158	146	-15.42	0	0	0	0	0	1	0	5366
tRF-1:32-Glu-TTC-2	ENSMUST00000114058.7	Pls3	Coding	Click Me	1	-0.201	141	-11.41	0	0	0	0	0	1	0	1104
tRF-1:32-Glu-TTC-2	ENSMUST00000024031.12	Acy1	Coding	Click Me	1	-0.147	147	-13.45	0	0	0	1	0	0	0	1206
tRF-1:32-Glu-TTC-2	ENSMUST00000022535.8	Dcp1a	Coding	Click Me	1	-0.201	142	-10.62	0	0	0	0	1	0	0	3750
tRF-1:32-Glu-TTC-2	ENSMUST00000091920.5	Rbm27	Coding	Click Me	1	-0.213	140	-10.3	0	0	0	1	0	0	0	3067
tRF-1:32-Glu-TTC-2	ENSMUST00000038463.14	Raver2	Coding	Click Me	1	-0.198	143	-10.7	0	0	0	0	0	1	0	3004
tRF-1:32-Glu-TTC-2	ENSMUST00000062370.8	Wdr89	Coding	Click Me	1	-0.22	142	-11.12	0	0	0	0	0	1	0	1724
tRF-1:32-Glu-TTC-2	ENSMUST00000114701.9	Pi16	Coding	Click Me	1	-0.106	145	-11.97	0	0	0	1	0	0	0	2211
tRF-1:32-Glu-TTC-2	ENSMUST00000026119.7	Gcgr	Coding	Click Me	1	-0.143	147	-15.33	0	0	0	0	0	1	0	3917
tRF-1:32-Glu-TTC-2	ENSMUST00000184858.1	Mroh6	Coding	Click Me	1	-0.162	145	-14.97	0	0	0	0	0	1	0	4868
tRF-1:32-Glu-TTC-2	ENSMUST00000027401.10	Stk16	Coding	Click Me	1	-0.35	147	-12.18	0	0	0	0	1	0	0	1658
tRF-1:32-Glu-TTC-2	ENSMUST00000203738.1	Prok2	Coding	Click Me	1	-0.437	149	-10.05	0	0	0	0	1	0	0	362
tRF-1:32-Glu-TTC-2	ENSMUST00000105687.8	Tmem201	Coding	Click Me	1	-0.113	155	-16.86	0	0	0	1	0	0	0	1606
tRF-1:32-Glu-TTC-2	ENSMUST00000115844.2	Glyr1	Coding	Click Me	1	-0.113	140	-11.6	0	0	0	0	0	1	0	1619
tRF-1:32-Glu-TTC-2	ENSMUST00000046892.9	Cplx1	Coding	Click Me	1	-0.315	150	-13.31	0	0	0	0	1	0	0	1575
tRF-1:32-Glu-TTC-2	ENSMUST00000025237.4	Tslp	Coding	Click Me	1	-0.121	140	-11.11	0	0	0	0	0	1	0	696
tRF-1:32-Glu-TTC-2	ENSMUST00000041047.3	Lnpep	Coding	Click Me	1	-0.226	145	-11.27	0	0	0	0	1	0	0	8358
tRF-1:32-Glu-TTC-2	ENSMUST00000032309.12	Ybx3	Coding	Click Me	1	-0.173	145	-12.77	0	0	0	1	0	0	0	2840
tRF-1:32-Glu-TTC-2	ENSMUST00000098070.9	Zfp462	Coding	Click Me	1	-0.264	146	-10.61	0	0	0	0	0	1	0	2690
tRF-1:32-Glu-TTC-2	ENSMUST00000050328.14	Eif2s3x	Coding	Click Me	1	-0.28	145	-14.76	0	0	0	0	0	1	0	2156
tRF-1:32-Glu-TTC-2	ENSMUST00000038108.11	Ndufc1	Coding	Click Me	1	-0.379	157	-14.8	0	0	0	0	1	0	0	2970
tRF-1:32-Glu-TTC-2	ENSMUST00000032824.9	Psmc4	Coding	Click Me	1	-0.134	140	-10.57	0	0	0	0	0	1	0	1161
tRF-1:32-Glu-TTC-2	ENSMUST00000119083.1	Slc28a1	Coding	Click Me	1	-0.17	157	-18.01	0	0	0	0	0	1	0	804
tRF-1:32-Glu-TTC-2	ENSMUST00000068860.12	Epha6	Coding	Click Me	1	-0.198	149	-15.9	0	0	0	1	0	0	0	12601
tRF-1:32-Glu-TTC-2	ENSMUST00000028059.8	Rsu1	Coding	Click Me	1	-0.188	145	-12.65	0	0	0	1	0	0	0	3412
tRF-1:32-Glu-TTC-2	ENSMUST00000039484.5	Zc3h12d	Coding	Click Me	1	-0.226	144	-11.06	0	0	0	0	1	0	0	2328
tRF-1:32-Glu-TTC-2	ENSMUST00000033477.4	F9	Coding	Click Me	1	-0.203	140	-11.45	0	0	0	0	0	1	0	1318
tRF-1:32-Glu-TTC-2	ENSMUST00000034529.13	Cul5	Coding	Click Me	1	-0.412	150	-11.19	0	0	0	0	1	0	0	792
tRF-1:32-Glu-TTC-2	ENSMUST00000214141.1	Olfr1087	Coding	Click Me	1	-0.358	144	-12.03	0	0	0	0	1	0	0	2797
tRF-1:32-Glu-TTC-2	ENSMUST00000000001.4	Gnai3	Coding	Click Me	1	-0.108	147	-10.99	0	0	0	1	0	0	0	3332
tRF-1:32-Glu-TTC-2	ENSMUST00000048718.3	Mmaa	Coding	Click Me	1	-0.347	149	-14.06	0	0	0	0	1	0	0	4334
tRF-1:32-Glu-TTC-2	ENSMUST00000019913.14	Frk	Coding	Click Me	1	-0.123	140	-10.24	0	0	0	0	0	1	0	4915
tRF-1:32-Glu-TTC-2	ENSMUST00000032138.14	Cnbp	Coding	Click Me	1	-0.108	146	-15.42	0	0	0	0	0	1	0	4787
tRF-1:32-Glu-TTC-2	ENSMUST00000059825.11	Crb1	Coding	Click Me	1	-0.171	141	-15.54	1	0	0	0	0	0	0	1516
tRF-1:32-Glu-TTC-2	ENSMUST00000075164.10	Kif21b	Coding	Click Me	1	-0.107	149	-15.75	0	0	0	1	0	0	0	5320
tRF-1:32-Glu-TTC-2	ENSMUST00000031091.12	D5Ertd579e	Coding	Click Me	1	-0.123	149	-16.5	0	0	0	0	0	1	0	2139
tRF-1:32-Glu-TTC-2	ENSMUST00000012580.12	Hps3	Coding	Click Me	1	-0.227	152	-12.74	0	0	0	1	0	0	0	957
tRF-1:32-Glu-TTC-2	ENSMUST00000047526.7	Asap3	Coding	Click Me	1	-0.157	140	-16.29	0	0	1	0	0	0	0	3654
tRF-1:32-Glu-TTC-2	ENSMUST00000102524.7	Plcb2	Coding	Click Me	1	-0.278	148	-11.63	0	0	0	0	1	0	0	4003
tRF-1:32-Glu-TTC-2	ENSMUST00000040687.11	Tax1bp3	Coding	Click Me	1	-0.182	145	-13.07	0	0	0	0	0	1	0	1403
tRF-1:32-Glu-TTC-2	ENSMUST00000029881.9	Mmp16	Coding	Click Me	1	-0.143	149	-11.69	0	0	0	0	1	0	0	9184
tRF-1:32-Glu-TTC-2	ENSMUST00000065630.7	Ddx10	Coding	Click Me	1	-0.29	154	-14.2	0	0	0	0	1	0	0	4603
tRF-1:32-Glu-TTC-2	ENSMUST00000166837.1	Gm17067	Coding	Click Me	1	-0.234	140	-10.25	0	0	0	1	0	0	0	4594
tRF-1:32-Glu-TTC-2	ENSMUST00000121337.7	Serpina3f	Coding	Click Me	1	-0.169	144	-12.99	0	0	0	0	0	1	0	609
tRF-1:32-Glu-TTC-2	ENSMUST00000023828.7	Rttn	Coding	Click Me	1	-0.227	140	-10.67	0	0	0	0	0	1	0	2590
tRF-1:32-Glu-TTC-2	ENSMUST00000003826.7	Htr3a	Coding	Click Me	1	-0.2	147	-12.79	0	0	0	0	0	1	0	479
tRF-1:32-Glu-TTC-2	ENSMUST00000169862.1	Taf4b	Coding	Click Me	1	-0.11	140	-11.29	0	0	0	0	0	1	0	3972
tRF-1:32-Glu-TTC-2	ENSMUST00000095580.2	Mypn	Coding	Click Me	1	-0.123	141	-11.87	0	0	0	0	0	1	0	5318
tRF-1:32-Glu-TTC-2	ENSMUST00000032071.12	Dusp11	Coding	Click Me	1	-0.216	153	-15.73	0	0	0	0	1	0	0	5337
tRF-1:32-Glu-TTC-2	ENSMUST00000026551.14	Dpysl4	Coding	Click Me	1	-0.104	155	-16.86	0	0	0	1	0	0	0	1711
tRF-1:32-Glu-TTC-2	ENSMUST00000106616.1	Cdc42ep4	Coding	Click Me	1	-0.181	151	-16.39	0	0	0	0	0	1	0	1664
tRF-1:32-Glu-TTC-2	ENSMUST00000164120.7	Tpx2	Coding	Click Me	1	-0.239	145	-12.72	0	0	0	0	1	0	0	2083
tRF-1:32-Glu-TTC-2	ENSMUST00000025314.5	Dele1	Coding	Click Me	1	-0.177	140	-11.65	0	0	0	0	0	1	0	5185
tRF-1:32-Glu-TTC-2	ENSMUST00000042125.14	Ttll4	Coding	Click Me	1	-0.128	142	-13.62	0	0	0	0	0	1	0	6031
tRF-1:32-Glu-TTC-2	ENSMUST00000101023.4	Gm16513	Coding	Click Me	1	-0.165	140	-10.61	0	0	0	0	0	1	0	1296
tRF-1:32-Glu-TTC-2	ENSMUST00000039733.9	Osbpl11	Coding	Click Me	1	-0.146	151	-16.3	0	0	0	0	0	1	0	1538
tRF-1:32-Glu-TTC-2	ENSMUST00000174651.1	Gm20604	Coding	Click Me	1	-0.129	140	-10.35	0	0	0	0	0	1	0	3539
tRF-1:32-Glu-TTC-2	ENSMUST00000040017.7	Mios	Coding	Click Me	1	-0.126	154	-10.52	0	0	0	0	1	0	0	10024
tRF-1:32-Glu-TTC-2	ENSMUST00000200758.3	Ube3a	Coding	Click Me	1	-0.244	141	-11.55	0	0	0	0	0	1	0	6606
tRF-1:32-Glu-TTC-2	ENSMUST00000034889.9	Hcn4	Coding	Click Me	1	-0.141	149	-10.18	0	0	0	0	1	0	0	2417
tRF-1:32-Glu-TTC-2	ENSMUST00000181892.8	Zfp748	Coding	Click Me	1	-0.222	143	-10.61	0	0	0	0	0	1	0	2160
tRF-1:32-Glu-TTC-2	ENSMUST00000001384.5	Cnn1	Coding	Click Me	1	-0.272	148	-12.68	0	0	0	0	1	0	0	1399
tRF-1:32-Glu-TTC-2	ENSMUST00000110325.7	Tmem87b	Coding	Click Me	1	-0.144	149	-10.99	0	0	0	1	0	0	0	4479
tRF-1:32-Glu-TTC-2	ENSMUST00000177530.7	Zfp169	Coding	Click Me	1	-0.169	142	-10.22	0	0	0	0	1	0	0	3513
tRF-1:32-Glu-TTC-2	ENSMUST00000067908.13	Rhobtb1	Coding	Click Me	1	-0.1	149	-12.85	0	0	0	0	0	1	0	2091
tRF-1:32-Glu-TTC-2	ENSMUST00000049242.8	Lrrc20	Coding	Click Me	1	-0.246	147	-12.01	0	0	0	0	1	0	0	2519
tRF-1:32-Glu-TTC-2	ENSMUST00000070658.15	Mgrn1	Coding	Click Me	1	-0.21	148	-14.68	0	0	0	0	1	0	0	1589
tRF-1:32-Glu-TTC-2	ENSMUST00000029076.5	Car3	Coding	Click Me	1	-0.147	153	-13.67	0	0	0	1	0	0	0	899
tRF-1:32-Glu-TTC-2	ENSMUST00000060125.6	Scn4b	Coding	Click Me	1	-0.111	140	-11.29	0	0	0	0	0	1	0	3648
tRF-1:32-Glu-TTC-2	ENSMUST00000224188.1	Hmgcs1	Coding	Click Me	1	-0.219	141	-10.22	0	0	0	0	0	1	0	1782
tRF-1:32-Glu-TTC-2	ENSMUST00000058011.7	Mcm2	Coding	Click Me	1	-0.177	140	-11.28	0	0	0	0	0	1	0	2379
tRF-1:32-Glu-TTC-2	ENSMUST00000019117.2	Hoxb1	Coding	Click Me	3	-0.651	454	-39.7	0	0	0	0	2	1	0	1117
tRF-1:32-Glu-TTC-2	ENSMUST00000183345.1	Triqk	Coding	Click Me	1	-0.195	149	-14.53	0	0	0	1	0	0	0	3385
tRF-1:32-Glu-TTC-2	ENSMUST00000202535.3	Zfp936	Coding	Click Me	1	-0.279	140	-10.92	0	0	0	0	1	0	0	1628
tRF-1:32-Glu-TTC-2	ENSMUST00000064364.2	Rnf185	Coding	Click Me	1	-0.143	152	-13.78	0	0	0	1	0	0	0	2008
tRF-1:32-Glu-TTC-2	ENSMUST00000165714.1	Fbxo34	Coding	Click Me	1	-0.124	140	-10.13	0	0	0	1	0	0	0	683
tRF-1:32-Glu-TTC-2	ENSMUST00000040636.8	Sec1	Coding	Click Me	1	-0.144	142	-10.22	0	0	0	0	0	1	0	769
tRF-1:32-Glu-TTC-2	ENSMUST00000029588.9	Larp7	Coding	Click Me	1	-0.274	145	-12.08	0	0	0	0	1	0	0	1365
tRF-1:32-Glu-TTC-2	ENSMUST00000023217.10	Bop1	Coding	Click Me	1	-0.31	152	-14.9	0	0	0	0	1	0	0	272
tRF-1:32-Glu-TTC-2	ENSMUST00000049005.14	Bmpr1a	Coding	Click Me	1	-0.233	145	-10.53	0	0	0	1	0	0	0	4839
tRF-1:32-Glu-TTC-2	ENSMUST00000191462.1	Smim10l1	Coding	Click Me	1	-0.127	145	-10.35	0	0	0	0	0	1	0	4039
tRF-1:32-Glu-TTC-2	ENSMUST00000018644.2	Adora2b	Coding	Click Me	1	-0.213	149	-13.31	0	0	0	0	0	1	0	733
tRF-1:32-Glu-TTC-2	ENSMUST00000025364.4	Yipf5	Coding	Click Me	1	-0.163	143	-12.02	0	0	0	0	0	1	0	3850
tRF-1:32-Glu-TTC-2	ENSMUST00000102546.3	Il22ra1	Coding	Click Me	1	-0.127	141	-11.55	0	0	0	0	0	1	0	4018
tRF-1:32-Glu-TTC-2	ENSMUST00000066728.9	Pde5a	Coding	Click Me	1	-0.127	142	-10.82	0	0	0	1	0	0	0	4042
tRF-1:32-Glu-TTC-2	ENSMUST00000032761.7	Pex11a	Coding	Click Me	1	-0.217	142	-11.09	0	0	0	1	0	0	0	2839
tRF-1:32-Glu-TTC-2	ENSMUST00000086461.12	Rfc5	Coding	Click Me	1	-0.26	152	-17.15	0	0	0	0	0	1	0	1707
tRF-1:32-Glu-TTC-2	ENSMUST00000221037.1	Fam50b	Coding	Click Me	1	-0.172	146	-16.1	0	0	0	0	0	1	0	75
tRF-1:32-Glu-TTC-2	ENSMUST00000035323.5	Spib	Coding	Click Me	1	-0.132	141	-10.35	0	0	0	0	0	1	0	1966
tRF-1:32-Glu-TTC-2	ENSMUST00000018470.9	Ywhab	Coding	Click Me	1	-0.437	149	-11.25	0	0	0	0	1	0	0	1863
tRF-1:32-Glu-TTC-2	ENSMUST00000057596.9	Olfr77	Coding	Click Me	1	-0.228	140	-11.14	0	0	0	0	0	1	0	1361
tRF-1:32-Glu-TTC-2	ENSMUST00000094649.10	Ugt2b36	Coding	Click Me	1	-0.225	141	-11.55	0	0	0	0	0	1	0	5809
tRF-1:32-Glu-TTC-2	ENSMUST00000052179.7	Pcdhb20	Coding	Click Me	1	-0.283	140	-10.61	0	0	0	0	0	1	0	849
tRF-1:32-Glu-TTC-2	ENSMUST00000163257.8	Fam172a	Coding	Click Me	1	-0.174	157	-19.65	0	0	0	0	0	1	0	5380
tRF-1:32-Glu-TTC-2	ENSMUST00000214897.1	Olfr366	Coding	Click Me	1	-0.212	141	-11.2	0	0	0	0	0	1	0	4086
tRF-1:32-Glu-TTC-2	ENSMUST00000019861.12	Zfp451	Coding	Click Me	1	-0.184	152	-15.35	0	0	0	1	0	0	0	1340
tRF-1:32-Glu-TTC-2	ENSMUST00000063414.8	Tbc1d22a	Coding	Click Me	1	-0.112	144	-10.26	0	0	0	0	0	1	0	1562
tRF-1:32-Glu-TTC-2	ENSMUST00000053273.14	Itpr2	Coding	Click Me	1	-0.18	146	-13.35	0	0	0	1	0	0	0	4702
tRF-1:32-Glu-TTC-2	ENSMUST00000025338.15	Gabbr1	Coding	Click Me	1	-0.167	150	-13.31	0	0	0	0	1	0	0	9352
tRF-1:32-Glu-TTC-2	ENSMUST00000021282.11	Pfas	Coding	Click Me	1	-0.273	149	-11.79	0	0	0	0	1	0	0	2809
tRF-1:32-Glu-TTC-2	ENSMUST00000057373.13	Rab11b	Coding	Click Me	1	-0.157	145	-12.65	0	0	0	1	0	0	0	5184
tRF-1:32-Glu-TTC-2	ENSMUST00000112574.8	Klf8	Coding	Click Me	1	-0.19	147	-15.01	0	0	0	0	0	1	0	6060
tRF-1:32-Glu-TTC-2	ENSMUST00000225720.1	Mat1a	Coding	Click Me	1	-0.157	152	-15.34	0	0	0	1	0	0	0	1807
tRF-1:32-Glu-TTC-2	ENSMUST00000115657.9	Pcdha11	Coding	Click Me	2	-0.314	316	-32.89	0	0	0	1	0	1	0	2401
tRF-1:32-Glu-TTC-2	ENSMUST00000216144.2	Olfr1231	Coding	Click Me	1	-0.141	140	-10.78	0	0	0	0	0	1	0	2863
tRF-1:32-Glu-TTC-2	ENSMUST00000107682.1	Tmem154	Coding	Click Me	1	-0.1	145	-11.5	0	0	0	0	0	1	0	2636
tRF-1:32-Glu-TTC-2	ENSMUST00000046399.6	Apmap	Coding	Click Me	1	-0.21	141	-11.08	0	0	0	1	0	0	0	918
tRF-1:32-Glu-TTC-2	ENSMUST00000116349.8	Xylt2	Coding	Click Me	1	-0.365	144	-11.06	0	0	0	0	1	0	0	740
tRF-1:32-Glu-TTC-2	ENSMUST00000053484.7	Eea1	Coding	Click Me	1	-0.229	147	-10.52	0	0	0	0	1	0	0	5025
tRF-1:32-Glu-TTC-2	ENSMUST00000033010.8	Kdm8	Coding	Click Me	2	-0.32	283	-21.2	0	0	0	1	0	1	0	1017
tRF-1:32-Glu-TTC-2	ENSMUST00000028351.8	Dph7	Coding	Click Me	1	-0.278	145	-14.28	0	0	0	0	0	1	0	1461
tRF-1:32-Glu-TTC-2	ENSMUST00000072943.4	Prl7c1	Coding	Click Me	1	-0.42	142	-10.61	0	0	0	0	1	0	0	205
tRF-1:32-Glu-TTC-2	ENSMUST00000213118.1	Olfr1197	Coding	Click Me	1	-0.283	140	-10.35	0	0	0	0	0	1	0	1750
tRF-1:32-Glu-TTC-2	ENSMUST00000096265.9	Foxr2	Coding	Click Me	1	-0.233	145	-14.28	0	0	0	0	0	1	0	1823
tRF-1:32-Glu-TTC-2	ENSMUST00000105738.8	Zfp980	Coding	Click Me	1	-0.411	141	-10.06	0	0	0	0	1	0	0	1801
tRF-1:32-Glu-TTC-2	ENSMUST00000050029.7	Six1	Coding	Click Me	1	-0.139	150	-12.02	0	0	0	1	0	0	0	5148
tRF-1:32-Glu-TTC-2	ENSMUST00000090002.9	Hnrnpa2b1	Coding	Click Me	1	-0.213	140	-10.35	0	0	0	0	0	1	0	2829
tRF-1:32-Glu-TTC-2	ENSMUST00000070725.10	Gabrg2	Coding	Click Me	1	-0.147	146	-10.57	0	0	0	0	0	1	0	5460
tRF-1:32-Glu-TTC-2	ENSMUST00000205701.1	Zfp59	Coding	Click Me	1	-0.26	152	-14.97	0	0	0	0	1	0	0	1352
tRF-1:32-Glu-TTC-2	ENSMUST00000047218.4	Reep4	Coding	Click Me	1	-0.173	141	-10.69	0	0	0	1	0	0	0	442
tRF-1:32-Glu-TTC-2	ENSMUST00000075172.11	Tspan32	Coding	Click Me	1	-0.154	142	-12.54	1	0	0	0	0	0	0	4544
tRF-1:32-Glu-TTC-2	ENSMUST00000187148.6	Zfy2	Coding	Click Me	1	-0.237	146	-10.45	0	0	0	0	0	1	0	284
tRF-1:32-Glu-TTC-2	ENSMUST00000029603.9	Prss12	Coding	Click Me	2	-0.408	304	-30.79	0	0	0	0	1	1	0	4251
tRF-1:32-Glu-TTC-2	ENSMUST00000030696.10	Fam76a	Coding	Click Me	1	-0.257	147	-10.99	0	0	0	1	0	0	0	2022
tRF-1:32-Glu-TTC-2	ENSMUST00000027529.11	Rab17	Coding	Click Me	1	-0.166	141	-11.28	0	0	0	1	0	0	0	754
tRF-1:32-Glu-TTC-2	ENSMUST00000051509.14	Ttll10	Coding	Click Me	2	-0.235	285	-27.07	0	0	0	1	0	1	0	2070
tRF-1:32-Glu-TTC-2	ENSMUST00000023104.6	Rpap3	Coding	Click Me	1	-0.202	140	-10.97	0	0	0	1	0	0	0	2287
tRF-1:32-Glu-TTC-2	ENSMUST00000204072.3	Olfr449	Coding	Click Me	1	-0.216	140	-10.61	0	0	0	0	0	1	0	698
tRF-1:32-Glu-TTC-2	ENSMUST00000164721.7	Nrg4	Coding	Click Me	2	-0.353	292	-25.79	0	0	0	1	1	0	0	3257
tRF-1:32-Glu-TTC-2	ENSMUST00000102534.10	Rasgrp1	Coding	Click Me	1	-0.294	162	-15.32	0	0	0	0	1	0	0	2558
tRF-1:32-Glu-TTC-2	ENSMUST00000049298.14	Tph1	Coding	Click Me	1	-0.117	140	-11.05	0	0	0	1	0	0	0	2785
tRF-1:32-Glu-TTC-2	ENSMUST00000029611.13	Lef1	Coding	Click Me	1	-0.16	143	-11.25	0	0	0	1	0	0	0	1285
tRF-1:32-Glu-TTC-2	ENSMUST00000035230.6	Amt	Coding	Click Me	1	-0.202	142	-10.22	0	0	0	0	0	1	0	1461
tRF-1:32-Glu-TTC-2	ENSMUST00000165704.7	Ptbp1	Coding	Click Me	1	-0.388	151	-14.51	0	0	0	0	1	0	0	1494
tRF-1:32-Glu-TTC-2	ENSMUST00000174158.2	Olfr309	Coding	Click Me	1	-0.24	140	-10.61	0	0	0	0	0	1	0	1711
tRF-1:32-Glu-TTC-2	ENSMUST00000046206.4	Rprd1a	Coding	Click Me	1	-0.147	145	-11.47	0	0	0	0	0	1	0	3225
tRF-1:32-Glu-TTC-2	ENSMUST00000173954.2	Zmym5	Coding	Click Me	1	-0.356	149	-15.57	0	0	0	0	1	0	0	3178
tRF-1:32-Glu-TTC-2	ENSMUST00000216616.2	Olfr1264	Coding	Click Me	1	-0.159	142	-10.22	0	0	0	0	0	1	0	2612
tRF-1:32-Glu-TTC-2	ENSMUST00000090190.13	Hic2	Coding	Click Me	1	-0.149	143	-11.21	0	0	0	0	0	1	0	4259
tRF-1:32-Glu-TTC-2	ENSMUST00000023360.13	Mpv17l	Coding	Click Me	1	-0.126	145	-12.18	0	0	0	0	1	0	0	2453
tRF-1:32-Glu-TTC-2	ENSMUST00000021246.8	Snx11	Coding	Click Me	1	-0.183	140	-19.1	0	1	0	0	0	0	0	4905
tRF-1:32-Glu-TTC-2	ENSMUST00000100584.2	Hhla1	Coding	Click Me	1	-0.291	140	-10.61	0	0	0	0	0	1	0	642
tRF-1:32-Glu-TTC-2	ENSMUST00000212606.1	Zfp90	Coding	Click Me	2	-0.386	299	-28.19	0	0	0	1	0	1	0	1983
tRF-1:32-Glu-TTC-2	ENSMUST00000040924.8	Ss18	Coding	Click Me	1	-0.139	149	-15.23	0	0	0	0	0	1	0	1662
tRF-1:32-Glu-TTC-2	ENSMUST00000213331.1	Olfr804	Coding	Click Me	1	-0.122	147	-10.52	0	0	0	1	0	0	0	4194
tRF-1:32-Glu-TTC-2	ENSMUST00000137116.2	Utp23	Coding	Click Me	1	-0.274	147	-11.76	0	0	0	0	1	0	0	2085
tRF-1:32-Glu-TTC-2	ENSMUST00000100497.10	Actb	Coding	Click Me	1	-0.382	149	-10.05	0	0	0	0	1	0	0	836
tRF-1:32-Glu-TTC-2	ENSMUST00000032168.6	Sec61a1	Coding	Click Me	1	-0.217	157	-14.41	0	0	0	0	1	0	0	1525
tRF-1:32-Glu-TTC-2	ENSMUST00000087320.12	Ddhd1	Coding	Click Me	1	-0.175	147	-12.01	0	0	0	0	1	0	0	7013
tRF-1:32-Glu-TTC-2	ENSMUST00000165971.2	Sept10	Coding	Click Me	1	-0.256	143	-12.54	0	0	0	0	0	1	0	1806
tRF-1:32-Glu-TTC-2	ENSMUST00000167998.1	Gba	Coding	Click Me	1	-0.237	150	-14.55	0	0	0	0	1	0	0	486
tRF-1:32-Glu-TTC-2	ENSMUST00000115068.9	Slc37a2	Coding	Click Me	1	-0.141	145	-10.41	0	0	0	0	1	0	0	5001
tRF-1:32-Glu-TTC-2	ENSMUST00000034511.6	Trim29	Coding	Click Me	1	-0.123	140	-10.22	0	0	0	0	0	1	0	953
tRF-1:32-Glu-TTC-2	ENSMUST00000043214.7	Rac2	Coding	Click Me	1	-0.377	140	-11.18	0	0	0	0	1	0	0	2319
tRF-1:32-Glu-TTC-2	ENSMUST00000042318.5	Fsd2	Coding	Click Me	1	-0.244	157	-14.87	0	0	0	0	1	0	0	4860
tRF-1:32-Glu-TTC-2	ENSMUST00000003870.13	Mxi1	Coding	Click Me	1	-0.142	157	-14.88	0	0	0	1	0	0	0	4074
tRF-1:32-Glu-TTC-2	ENSMUST00000025595.4	Fam111a	Coding	Click Me	1	-0.321	145	-12.01	0	0	0	0	1	0	0	1164
tRF-1:32-Glu-TTC-2	ENSMUST00000029761.13	Myoz2	Coding	Click Me	1	-0.148	142	-14.57	0	1	0	0	0	0	0	3297
tRF-1:32-Glu-TTC-2	ENSMUST00000200932.3	Gm3286	Coding	Click Me	1	-0.215	140	-11.03	0	0	0	0	0	1	0	434
tRF-1:32-Glu-TTC-2	ENSMUST00000124036.7	Tbc1d14	Coding	Click Me	1	-0.309	145	-18.23	0	0	1	0	0	0	0	310
tRF-1:32-Glu-TTC-2	ENSMUST00000213365.1	Olfr393	Coding	Click Me	1	-0.247	145	-12.04	0	0	0	0	0	1	0	2772
tRF-1:32-Glu-TTC-2	ENSMUST00000172831.7	Rgs22	Coding	Click Me	1	-0.101	150	-10.11	0	0	0	0	1	0	0	2675
tRF-1:32-Glu-TTC-2	ENSMUST00000048309.11	Camsap2	Coding	Click Me	1	-0.111	140	-10.22	0	0	0	0	0	1	0	2983
tRF-1:32-Glu-TTC-2	ENSMUST00000106781.1	Pars2	Coding	Click Me	1	-0.154	162	-18.66	0	0	0	0	0	1	0	722
tRF-1:32-Glu-TTC-2	ENSMUST00000068958.8	Cdc42ep3	Coding	Click Me	1	-0.304	143	-11.18	0	0	0	0	1	0	0	3429
tRF-1:32-Glu-TTC-2	ENSMUST00000094815.4	Sae1	Coding	Click Me	1	-0.191	141	-10.77	0	0	0	1	0	0	0	2439
tRF-1:32-Glu-TTC-2	ENSMUST00000016309.15	Tmbim1	Coding	Click Me	1	-0.122	140	-13.19	0	0	0	0	0	1	0	1703
tRF-1:32-Glu-TTC-2	ENSMUST00000045110.13	Dstyk	Coding	Click Me	1	-0.35	141	-10.27	0	0	0	0	1	0	0	4914
tRF-1:32-Glu-TTC-2	ENSMUST00000037248.9	Hirip3	Coding	Click Me	1	-0.182	154	-14.89	0	0	0	1	0	0	0	486
tRF-1:32-Glu-TTC-2	ENSMUST00000021063.12	Psmd12	Coding	Click Me	1	-0.169	141	-15.64	0	0	1	0	0	0	0	2044
tRF-1:32-Glu-TTC-2	ENSMUST00000020057.15	Lin7a	Coding	Click Me	1	-0.208	154	-12.55	0	0	0	0	1	0	0	5155
tRF-1:32-Glu-TTC-2	ENSMUST00000034600.4	Mpzl2	Coding	Click Me	1	-0.127	150	-11.27	0	0	0	0	0	1	0	2904
tRF-1:32-Glu-TTC-2	ENSMUST00000059204.10	Fbxl7	Coding	Click Me	1	-0.105	141	-11.56	0	0	0	1	0	0	0	2631
tRF-1:32-Glu-TTC-2	ENSMUST00000025773.3	Pold4	Coding	Click Me	1	-0.321	155	-16.86	0	0	0	0	1	0	0	3878
tRF-1:32-Glu-TTC-2	ENSMUST00000074144.10	Dcaf8	Coding	Click Me	1	-0.112	155	-17.33	0	0	0	1	0	0	0	2653
tRF-1:32-Glu-TTC-2	ENSMUST00000031161.10	Thegl	Coding	Click Me	1	-0.171	146	-14.3	0	0	0	1	0	0	0	1420
tRF-1:32-Glu-TTC-2	ENSMUST00000021471.12	Tmx1	Coding	Click Me	1	-0.21	143	-12.54	0	0	0	0	0	1	0	2422
tRF-1:32-Glu-TTC-2	ENSMUST00000053862.11	Pqlc2	Coding	Click Me	1	-0.113	147	-12.48	0	0	0	1	0	0	0	4864
tRF-1:32-Glu-TTC-2	ENSMUST00000213474.2	Olfr1025-ps1	Coding	Click Me	1	-0.164	150	-10.29	0	0	0	0	0	1	0	2516
tRF-1:32-Glu-TTC-2	ENSMUST00000102636.3	Akirin1	Coding	Click Me	1	-0.145	140	-10.22	0	0	0	0	0	1	0	5091
tRF-1:32-Glu-TTC-2	ENSMUST00000163799.8	Stard10	Coding	Click Me	1	-0.115	142	-12.78	0	0	0	0	0	1	0	1385
tRF-1:32-Glu-TTC-2	ENSMUST00000020579.8	Hmmr	Coding	Click Me	1	-0.171	158	-17.58	0	0	0	0	0	1	0	3576
tRF-1:32-Glu-TTC-2	ENSMUST00000041905.7	Gm49336	Coding	Click Me	1	-0.275	150	-10.58	0	0	0	1	0	0	0	2126
tRF-1:32-Glu-TTC-2	ENSMUST00000136432.1	BC048403	Coding	Click Me	1	-0.329	156	-16.45	0	0	0	0	1	0	0	1759
tRF-1:32-Glu-TTC-2	ENSMUST00000095941.8	Fbxo34	Coding	Click Me	1	-0.131	140	-10.13	0	0	0	1	0	0	0	628
tRF-1:32-Glu-TTC-2	ENSMUST00000091190.11	Ddx3y	Coding	Click Me	1	-0.258	145	-10.7	0	0	0	0	0	1	0	2573
tRF-1:32-Glu-TTC-2	ENSMUST00000132583.7	Crispld2	Coding	Click Me	1	-0.279	145	-12.01	0	0	0	0	1	0	0	2456
tRF-1:32-Glu-TTC-2	ENSMUST00000054415.11	Zfp668	Coding	Click Me	1	-0.143	141	-12.08	0	0	0	0	0	1	0	5284
tRF-1:32-Glu-TTC-2	ENSMUST00000131070.1	Ide	Coding	Click Me	1	-0.204	156	-17.38	0	0	0	0	1	0	0	2012
tRF-1:32-Glu-TTC-2	ENSMUST00000025020.5	Rgs11	Coding	Click Me	1	-0.192	154	-10.52	0	0	0	1	0	0	0	594
tRF-1:32-Glu-TTC-2	ENSMUST00000067124.5	Lpin1	Coding	Click Me	1	-0.175	150	-10.05	0	0	0	0	1	0	0	2744
tRF-1:32-Glu-TTC-2	ENSMUST00000164727.7	F13a1	Coding	Click Me	1	-0.175	142	-10.61	0	0	0	0	0	1	0	4758
tRF-1:32-Glu-TTC-2	ENSMUST00000025581.6	Ms4a4d	Coding	Click Me	1	-0.274	142	-10.35	0	0	0	0	0	1	0	2523
tRF-1:32-Glu-TTC-2	ENSMUST00000078647.10	Rab43	Coding	Click Me	1	-0.227	156	-14.46	0	0	0	1	0	0	0	3783
tRF-1:32-Glu-TTC-2	ENSMUST00000071023.11	Fam122b	Coding	Click Me	1	-0.201	143	-11.61	0	0	0	0	0	1	0	2735
tRF-1:32-Glu-TTC-2	ENSMUST00000190594.1	Taf9	Coding	Click Me	1	-0.18	146	-11.97	0	0	0	1	0	0	0	745
tRF-1:32-Glu-TTC-2	ENSMUST00000180572.1	Agrn	Coding	Click Me	1	-0.144	149	-20.47	0	1	0	0	0	0	0	718
tRF-1:32-Glu-TTC-2	ENSMUST00000106177.7	Notum	Coding	Click Me	1	-0.277	144	-10.7	0	0	0	0	0	1	0	3594
tRF-1:32-Glu-TTC-2	ENSMUST00000197679.4	Il6ra	Coding	Click Me	1	-0.217	140	-11.29	0	0	0	0	0	1	0	7102
tRF-1:32-Glu-TTC-2	ENSMUST00000227520.1	Vmn1r203	Coding	Click Me	1	-0.247	150	-14.39	0	0	0	1	0	0	0	7006
tRF-1:32-Glu-TTC-2	ENSMUST00000009425.6	Rarres2	Coding	Click Me	1	-0.141	145	-11.47	0	0	0	0	0	1	0	171
tRF-1:32-Glu-TTC-2	ENSMUST00000195524.1	Lrba	Coding	Click Me	1	-0.15	140	-10.49	0	0	0	1	0	0	0	1031
tRF-1:32-Glu-TTC-2	ENSMUST00000098190.9	Rragd	Coding	Click Me	1	-0.255	140	-10.61	0	0	0	0	0	1	0	5266
tRF-1:32-Glu-TTC-2	ENSMUST00000103212.9	Ube4b	Coding	Click Me	1	-0.218	151	-14.8	0	0	0	1	0	0	0	1260
tRF-1:32-Glu-TTC-2	ENSMUST00000189888.6	Zfy1	Coding	Click Me	1	-0.228	142	-10.35	0	0	0	0	0	1	0	287
tRF-1:32-Glu-TTC-2	ENSMUST00000112101.7	Itga6	Coding	Click Me	1	-0.176	155	-19.13	0	0	0	0	0	1	0	3397
tRF-1:32-Glu-TTC-2	ENSMUST00000103220.3	Snrnp200	Coding	Click Me	1	-0.27	154	-15.77	0	0	0	0	0	1	0	2446
tRF-1:32-Glu-TTC-2	ENSMUST00000011607.5	Cpb1	Coding	Click Me	1	-0.265	155	-17.38	0	0	0	0	1	0	0	1387
tRF-1:32-Glu-TTC-2	ENSMUST00000169851.7	Map4	Coding	Click Me	1	-0.168	140	-10.65	0	0	0	0	0	1	0	3031
tRF-1:32-Glu-TTC-2	ENSMUST00000080141.5	Tmem117	Coding	Click Me	1	-0.15	146	-11.4	0	0	0	1	0	0	0	1511
tRF-1:32-Glu-TTC-2	ENSMUST00000204682.2	Prokr1	Coding	Click Me	1	-0.182	149	-13.96	0	0	0	0	0	1	0	2629
tRF-1:32-Glu-TTC-2	ENSMUST00000090339.10	Rai14	Coding	Click Me	1	-0.119	148	-14.24	0	0	0	0	0	1	0	1728
tRF-1:32-Glu-TTC-2	ENSMUST00000036315.15	Gria1	Coding	Click Me	1	-0.261	145	-12.37	0	0	0	0	1	0	0	4834
tRF-1:32-Glu-TTC-2	ENSMUST00000165576.7	Fam3c	Coding	Click Me	1	-0.274	143	-11.87	0	0	0	0	1	0	0	4708
tRF-1:32-Glu-TTC-2	ENSMUST00000019447.14	Psmc3ip	Coding	Click Me	1	-0.154	144	-14.36	0	0	0	0	0	1	0	577
tRF-1:32-Glu-TTC-2	ENSMUST00000029559.6	Il6ra	Coding	Click Me	1	-0.119	140	-11.29	0	0	0	0	0	1	0	7794
tRF-1:32-Glu-TTC-2	ENSMUST00000055168.4	Kcna1	Coding	Click Me	1	-0.156	144	-13.33	0	0	0	0	0	1	0	5405
tRF-1:32-Glu-TTC-2	ENSMUST00000115477.7	Foxp2	Coding	Click Me	1	-0.139	140	-10.61	0	0	0	0	0	1	0	4719
tRF-1:32-Glu-TTC-2	ENSMUST00000107537.4	Ube3a	Coding	Click Me	1	-0.227	141	-11.55	0	0	0	0	0	1	0	6731
tRF-1:32-Glu-TTC-2	ENSMUST00000030400.13	Mycbp	Coding	Click Me	1	-0.107	154	-12.27	0	0	0	0	1	0	0	4183
tRF-1:32-Glu-TTC-2	ENSMUST00000117268.7	Otud6b	Coding	Click Me	2	-0.504	293	-23.99	0	0	0	0	1	1	0	10180
tRF-1:32-Glu-TTC-2	ENSMUST00000112147.7	Frmpd4	Coding	Click Me	1	-0.187	150	-13.31	0	0	0	0	1	0	0	3989
tRF-1:32-Glu-TTC-2	ENSMUST00000044380.7	Foxa1	Coding	Click Me	1	-0.238	143	-10.05	0	0	0	0	1	0	0	4350
tRF-1:32-Glu-TTC-2	ENSMUST00000020939.15	Nrcam	Coding	Click Me	1	-0.295	151	-14.04	0	0	0	0	1	0	0	6624
tRF-1:32-Glu-TTC-2	ENSMUST00000065074.13	Rsrc1	Coding	Click Me	1	-0.251	149	-15.88	0	0	0	0	1	0	0	2082
tRF-1:32-Glu-TTC-2	ENSMUST00000214841.2	Olfr554	Coding	Click Me	1	-0.178	141	-12.34	0	0	0	0	0	1	0	1354
tRF-1:32-Glu-TTC-2	ENSMUST00000147615.1	Khdc1b	Coding	Click Me	1	-0.175	150	-18.53	0	0	0	0	0	1	0	1485
tRF-1:32-Glu-TTC-2	ENSMUST00000004281.9	Dyrk2	Coding	Click Me	1	-0.174	145	-20.85	0	1	0	0	0	0	0	6063
tRF-1:32-Glu-TTC-2	ENSMUST00000113796.7	Tmbim1	Coding	Click Me	1	-0.205	140	-13.19	0	0	0	0	0	1	0	1119
tRF-1:32-Glu-TTC-2	ENSMUST00000005678.5	Fcer2a	Coding	Click Me	1	-0.204	141	-12.02	0	0	0	0	0	1	0	1073
tRF-1:32-Glu-TTC-2	ENSMUST00000120495.1	Cox17	Coding	Click Me	1	-0.412	148	-10.11	0	0	0	0	1	0	0	4835
tRF-1:32-Glu-TTC-2	ENSMUST00000048519.16	Snx13	Coding	Click Me	1	-0.184	149	-13.15	0	0	0	0	0	1	0	4208
tRF-1:32-Glu-TTC-2	ENSMUST00000163192.9	Ei24	Coding	Click Me	1	-0.157	148	-15.42	0	0	0	0	0	1	0	1249
tRF-1:32-Glu-TTC-2	ENSMUST00000065600.7	BC048403	Coding	Click Me	1	-0.332	156	-16.45	0	0	0	0	1	0	0	1746
tRF-1:32-Glu-TTC-2	ENSMUST00000163301.7	Zfp454	Coding	Click Me	1	-0.179	141	-10.22	0	0	0	0	0	1	0	273
tRF-1:32-Glu-TTC-2	ENSMUST00000094004.4	Abhd15	Coding	Click Me	1	-0.144	145	-13.42	0	0	0	1	0	0	0	3934
tRF-1:32-Glu-TTC-2	ENSMUST00000028119.6	Mastl	Coding	Click Me	1	-0.123	157	-16.68	0	0	0	0	0	1	0	4009
tRF-1:32-Glu-TTC-2	ENSMUST00000106937.7	Art5	Coding	Click Me	1	-0.23	150	-15.58	0	0	0	0	0	1	0	234
tRF-1:32-Glu-TTC-2	ENSMUST00000114132.7	Zdbf2	Coding	Click Me	1	-0.394	157	-17.38	0	0	0	0	1	0	0	4631
tRF-1:32-Glu-TTC-2	ENSMUST00000191265.1	Gm28168	Coding	Click Me	1	-0.271	142	-14.19	0	0	0	0	0	1	0	1803
tRF-1:32-Glu-TTC-2	ENSMUST00000117880.7	Thegl	Coding	Click Me	1	-0.183	146	-14.3	0	0	0	1	0	0	0	1335
tRF-1:32-Glu-TTC-2	ENSMUST00000075869.12	Fbxo40	Coding	Click Me	1	-0.163	157	-16.86	0	0	0	0	1	0	0	2613
tRF-1:32-Glu-TTC-2	ENSMUST00000029842.8	Bcl10	Coding	Click Me	1	-0.103	140	-12.03	0	0	0	0	0	1	0	2960
tRF-1:32-Glu-TTC-2	ENSMUST00000062125.10	Timm29	Coding	Click Me	1	-0.177	153	-16.34	0	0	0	0	0	1	0	2132
tRF-1:32-Glu-TTC-2	ENSMUST00000113495.8	Taf9b	Coding	Click Me	1	-0.217	150	-15.58	0	0	0	0	0	1	0	1611
tRF-1:32-Glu-TTC-2	ENSMUST00000025831.6	Dock8	Coding	Click Me	1	-0.14	150	-13.78	0	0	0	1	0	0	0	2501
tRF-1:32-Glu-TTC-2	ENSMUST00000054865.12	Cfap69	Coding	Click Me	1	-0.11	142	-11.09	0	0	0	1	0	0	0	1918
tRF-1:32-Glu-TTC-2	ENSMUST00000214340.1	Ackr2	Coding	Click Me	1	-0.126	141	-16.47	0	1	0	0	0	0	0	1377
tRF-1:32-Glu-TTC-2	ENSMUST00000034846.6	1700017B05Rik	Coding	Click Me	1	-0.123	142	-11.82	0	0	0	1	0	0	0	2821
tRF-1:32-Glu-TTC-2	ENSMUST00000062315.5	Tlr6	Coding	Click Me	1	-0.26	142	-15.7	0	0	1	0	0	0	0	1224
tRF-1:32-Glu-TTC-2	ENSMUST00000213258.1	Olfr346	Coding	Click Me	1	-0.188	142	-11.18	0	0	0	1	0	0	0	2360
tRF-1:32-Glu-TTC-2	ENSMUST00000021506.5	Serpina3n	Coding	Click Me	1	-0.241	140	-11.09	0	0	0	0	1	0	0	730
tRF-1:32-Glu-TTC-2	ENSMUST00000102585.1	Fgf11	Coding	Click Me	1	-0.167	148	-13.31	0	0	0	0	0	1	0	2129
tRF-1:32-Glu-TTC-2	ENSMUST00000040455.4	Hif1an	Coding	Click Me	1	-0.101	150	-12.65	0	0	0	1	0	0	0	10763
tRF-1:32-Glu-TTC-2	ENSMUST00000033731.3	Zfp275	Coding	Click Me	1	-0.183	151	-16.39	0	0	0	0	0	1	0	4697
tRF-1:32-Glu-TTC-2	ENSMUST00000144662.7	Fam111a	Coding	Click Me	1	-0.215	145	-12.01	0	0	0	0	1	0	0	2645
tRF-1:32-Glu-TTC-2	ENSMUST00000031143.12	Srd5a3	Coding	Click Me	1	-0.273	144	-13.92	0	0	0	0	1	0	0	5311
tRF-1:32-Glu-TTC-2	ENSMUST00000022504.11	Mapk8	Coding	Click Me	1	-0.207	146	-10.69	0	0	0	1	0	0	0	5001
tRF-1:32-Glu-TTC-2	ENSMUST00000097632.4	Gal3st2c	Coding	Click Me	1	-0.128	146	-10.13	0	0	0	0	1	0	0	7622
tRF-1:32-Glu-TTC-2	ENSMUST00000041890.7	Tm6sf1	Coding	Click Me	1	-0.205	140	-10.61	0	0	0	0	0	1	0	1643
tRF-1:32-Glu-TTC-2	ENSMUST00000023754.5	Aqp6	Coding	Click Me	1	-0.127	147	-10.52	0	0	0	1	0	0	0	1178
tRF-1:32-Glu-TTC-2	ENSMUST00000048096.11	Tlr4	Coding	Click Me	1	-0.147	152	-16.46	0	0	0	1	0	0	0	5637
tRF-1:32-Glu-TTC-2	ENSMUST00000025120.7	Elp2	Coding	Click Me	1	-0.189	146	-13.15	0	0	0	1	0	0	0	935
tRF-1:32-Glu-TTC-2	ENSMUST00000027657.13	C4bp	Coding	Click Me	1	-0.106	145	-14.45	0	0	0	0	0	1	0	1671
tRF-1:32-Glu-TTC-2	ENSMUST00000162159.7	Lrrc9	Coding	Click Me	1	-0.236	147	-12.79	0	0	0	0	0	1	0	5268
tRF-1:32-Glu-TTC-2	ENSMUST00000047379.14	Ptger4	Coding	Click Me	1	-0.295	141	-10.27	0	0	0	0	1	0	0	1234
tRF-1:32-Glu-TTC-2	ENSMUST00000160218.1	Smim17	Coding	Click Me	1	-0.285	145	-10.28	0	0	0	1	0	0	0	2703
tRF-1:32-Glu-TTC-2	ENSMUST00000047463.14	Arhgap44	Coding	Click Me	1	-0.294	147	-13.67	0	0	0	0	1	0	0	1453
tRF-1:32-Glu-TTC-2	ENSMUST00000066610.7	Inka2	Coding	Click Me	1	-0.135	147	-14.28	0	0	0	0	0	1	0	3650
tRF-1:32-Glu-TTC-2	ENSMUST00000098402.4	Snrpn	Coding	Click Me	1	-0.354	148	-10.96	0	0	0	0	1	0	0	4434
tRF-1:32-Glu-TTC-2	ENSMUST00000109272.8	Mier3	Coding	Click Me	1	-0.207	147	-13.09	0	0	0	0	1	0	0	3494
tRF-1:32-Glu-TTC-2	ENSMUST00000100404.5	B3glct	Coding	Click Me	1	-0.135	143	-10.7	0	0	0	0	0	1	0	2993
tRF-1:32-Glu-TTC-2	ENSMUST00000025835.4	Cpt1a	Coding	Click Me	1	-0.222	145	-12.48	0	0	0	1	0	0	0	4171
tRF-1:32-Glu-TTC-2	ENSMUST00000019945.14	Pex3	Coding	Click Me	1	-0.281	147	-14.26	0	0	0	0	0	1	0	941
tRF-1:32-Glu-TTC-2	ENSMUST00000098604.11	Spint2	Coding	Click Me	1	-0.288	160	-18.61	0	0	0	0	1	0	0	877
tRF-1:32-Glu-TTC-2	ENSMUST00000178142.1	Nim1k	Coding	Click Me	1	-0.11	145	-12.98	0	0	0	0	0	1	0	1952
tRF-1:32-Glu-TTC-2	ENSMUST00000064444.7	Maneal	Coding	Click Me	1	-0.137	152	-16.44	0	0	0	0	0	1	0	1368
tRF-1:32-Glu-TTC-2	ENSMUST00000008748.7	Ubqln4	Coding	Click Me	1	-0.312	146	-15.39	0	0	1	0	0	0	0	1492
tRF-1:32-Glu-TTC-2	ENSMUST00000053073.5	Pcdhb11	Coding	Click Me	1	-0.1	147	-14.14	0	0	0	1	0	0	0	1836
tRF-1:32-Glu-TTC-2	ENSMUST00000146150.2	Gpr137c	Coding	Click Me	1	-0.159	142	-10.22	0	0	0	1	0	0	0	2658
tRF-1:32-Glu-TTC-2	ENSMUST00000181504.1	Foxf1	Coding	Click Me	1	-0.132	146	-12.84	0	0	0	0	0	1	0	2192
tRF-1:32-Glu-TTC-2	uc056zmu.1	AK034330	Coding	Click Me	1	-0.133	140	-10.22	0	0	0	0	0	1	0	2481
tRF-1:32-Glu-TTC-2	ENSMUST00000082008.11	Tspan32	Coding	Click Me	1	-0.153	142	-12.54	1	0	0	0	0	0	0	747
tRF-1:32-Glu-TTC-2	ENSMUST00000079287.11	Nme5	Coding	Click Me	1	-0.221	147	-14.14	0	0	0	0	0	1	0	89
tRF-1:32-Glu-TTC-2	ENSMUST00000034775.9	Fem1b	Coding	Click Me	1	-0.438	142	-10.57	0	0	0	0	1	0	0	4605
tRF-1:32-Glu-TTC-2	ENSMUST00000154704.7	Dcaf17	Coding	Click Me	1	-0.248	140	-10.35	0	0	0	0	0	1	0	5929
tRF-1:32-Glu-TTC-2	ENSMUST00000004715.1	Mospd2	Coding	Click Me	1	-0.357	140	-10.45	0	0	0	0	1	0	0	3580
tRF-1:32-Glu-TTC-2	ENSMUST00000094464.9	Casz1	Coding	Click Me	1	-0.102	151	-16.53	0	0	0	1	0	0	0	530
tRF-1:32-Glu-TTC-2	ENSMUST00000129449.2	Tmem170b	Coding	Click Me	1	-0.118	146	-13.87	0	0	0	1	0	0	0	6771
tRF-1:32-Glu-TTC-2	ENSMUST00000118261.7	Cdc7	Coding	Click Me	1	-0.141	143	-13.45	0	0	0	0	0	1	0	1076
tRF-1:32-Glu-TTC-2	ENSMUST00000061280.16	Pcmtd1	Coding	Click Me	1	-0.215	148	-13.31	0	0	0	0	0	1	0	3746
tRF-1:32-Glu-TTC-2	ENSMUST00000032065.14	Pcyox1	Coding	Click Me	1	-0.215	154	-16.66	0	0	0	0	0	1	0	4874
tRF-1:32-Glu-TTC-2	ENSMUST00000026296.7	Fgd1	Coding	Click Me	1	-0.3	150	-13.31	0	0	0	0	1	0	0	613
tRF-1:32-Glu-TTC-2	ENSMUST00000046565.12	Arx	Coding	Click Me	1	-0.208	143	-10.35	0	0	0	0	0	1	0	954
tRF-1:32-Glu-TTC-2	ENSMUST00000056915.2	Pcdhb13	Coding	Click Me	1	-0.269	140	-10.35	0	0	0	0	0	1	0	1248
tRF-1:32-Glu-TTC-2	ENSMUST00000115086.12	Ei24	Coding	Click Me	1	-0.2	148	-15.42	0	0	0	0	0	1	0	948
tRF-1:32-Glu-TTC-2	ENSMUST00000029402.14	Slc33a1	Coding	Click Me	1	-0.278	156	-17.38	0	0	0	0	1	0	0	3432
tRF-1:32-Glu-TTC-2	ENSMUST00000039088.8	Tex19.1	Coding	Click Me	1	-0.198	166	-21.7	0	0	0	0	0	1	0	446
tRF-1:32-Glu-TTC-2	ENSMUST00000056949.4	Spesp1	Coding	Click Me	1	-0.315	149	-20.4	0	0	1	0	0	0	0	1696
tRF-1:32-Glu-TTC-2	ENSMUST00000037401.9	Phf20	Coding	Click Me	1	-0.175	142	-10.64	0	0	0	0	0	1	0	4432
tRF-1:32-Glu-TTC-2	ENSMUST00000020071.3	Sim1	Coding	Click Me	1	-0.173	141	-12.02	0	0	0	0	0	1	0	4811
tRF-1:32-Glu-TTC-2	ENSMUST00000215210.1	Olfr1278	Coding	Click Me	1	-0.251	145	-12.18	0	0	0	0	1	0	0	5675
tRF-1:32-Glu-TTC-2	ENSMUST00000202622.3	Eif4h	Coding	Click Me	1	-0.407	141	-10.05	0	0	0	0	1	0	0	1788
tRF-1:32-Glu-TTC-2	ENSMUST00000203785.2	Olfr802	Coding	Click Me	2	-0.4	296	-25.66	0	0	0	1	0	1	0	4116
tRF-1:32-Glu-TTC-2	ENSMUST00000022311.11	Oxsm	Coding	Click Me	1	-0.262	149	-13.99	0	0	0	0	1	0	0	5274
tRF-1:32-Glu-TTC-2	ENSMUST00000084731.4	Ipo7	Coding	Click Me	1	-0.208	147	-10.52	0	0	0	1	0	0	0	4292
tRF-1:32-Glu-TTC-2	ENSMUST00000192512.5	Pcdha4	Coding	Click Me	2	-0.314	316	-32.89	0	0	0	1	0	1	0	2401
tRF-1:32-Glu-TTC-2	ENSMUST00000233982.1	Vmn1r225	Coding	Click Me	1	-0.114	144	-11.35	0	0	0	0	1	0	0	2953
tRF-1:32-Glu-TTC-2	ENSMUST00000143914.7	Zpld1	Coding	Click Me	1	-0.427	145	-13.11	0	0	0	0	1	0	0	2243
tRF-1:32-Glu-TTC-2	ENSMUST00000037321.7	Slc7a12	Coding	Click Me	1	-0.244	145	-12.31	0	0	0	0	1	0	0	2893
tRF-1:32-Glu-TTC-2	ENSMUST00000107254.7	Rfx5	Coding	Click Me	1	-0.216	140	-10.35	0	0	0	0	0	1	0	3976
tRF-1:32-Glu-TTC-2	ENSMUST00000021674.6	Fos	Coding	Click Me	1	-0.157	145	-15.1	0	0	0	1	0	0	0	1112
tRF-1:32-Glu-TTC-2	ENSMUST00000228434.1	Col20a1	Coding	Click Me	1	-0.104	146	-13.62	0	0	0	1	0	0	0	1049
tRF-1:32-Glu-TTC-2	ENSMUST00000071585.9	Oprl1	Coding	Click Me	1	-0.12	141	-14.51	1	0	0	0	0	0	0	1648
tRF-1:32-Glu-TTC-2	ENSMUST00000022507.12	Pspc1	Coding	Click Me	1	-0.336	150	-13.31	0	0	0	0	1	0	0	2388
tRF-1:32-Glu-TTC-2	ENSMUST00000085658.4	Insyn1	Coding	Click Me	1	-0.104	154	-16.25	0	0	0	0	0	1	0	5013
tRF-1:32-Glu-TTC-2	ENSMUST00000081989.7	Rnf217	Coding	Click Me	1	-0.126	140	-10.61	0	0	0	0	0	1	0	9478
tRF-1:32-Glu-TTC-2	ENSMUST00000029911.11	Pnisr	Coding	Click Me	1	-0.165	150	-16	0	0	0	0	0	1	0	4359
tRF-1:32-Glu-TTC-2	ENSMUST00000046689.12	Resf1	Coding	Click Me	1	-0.236	140	-10.65	0	0	0	0	0	1	0	1010
tRF-1:32-Glu-TTC-2	NM_001310084	Gm20716	Coding	Click Me	1	-0.151	140	-10.62	0	0	0	0	0	1	0	1484
tRF-1:32-Glu-TTC-2	ENSMUST00000079625.10	Tor3a	Coding	Click Me	1	-0.125	144	-11.06	0	0	0	0	1	0	0	4650
tRF-1:32-Glu-TTC-2	ENSMUST00000107256.3	Rab38	Coding	Click Me	1	-0.356	143	-10.16	0	0	0	0	1	0	0	4074
tRF-1:32-Glu-TTC-2	ENSMUST00000144326.3	Ranbp9	Coding	Click Me	1	-0.336	145	-13.08	0	0	0	0	1	0	0	1647
tRF-1:32-Glu-TTC-2	ENSMUST00000042665.8	Parp14	Coding	Click Me	1	-0.184	153	-14.99	0	0	0	1	0	0	0	1787
tRF-1:32-Glu-TTC-2	ENSMUST00000136644.7	Atxn7l1	Coding	Click Me	1	-0.299	148	-14.32	0	0	0	0	1	0	0	2712
tRF-1:32-Glu-TTC-2	ENSMUST00000044039.1	Lrrd1	Coding	Click Me	1	-0.292	149	-12.4	0	0	0	1	0	0	0	50
tRF-1:32-Glu-TTC-2	ENSMUST00000005950.11	Mmp12	Coding	Click Me	1	-0.157	149	-11.77	0	0	0	1	0	0	0	2134
tRF-1:32-Glu-TTC-2	ENSMUST00000102765.8	Col23a1	Coding	Click Me	1	-0.105	151	-18.33	0	0	0	0	0	1	0	3859
tRF-1:32-Glu-TTC-2	ENSMUST00000105923.7	Tspan32	Coding	Click Me	1	-0.153	142	-12.54	1	0	0	0	0	0	0	747
tRF-1:32-Glu-TTC-2	ENSMUST00000192937.1	Tigd5	Coding	Click Me	1	-0.231	141	-10.06	0	0	0	0	1	0	0	2816
tRF-1:32-Glu-TTC-2	ENSMUST00000216397.2	Olfr1013	Coding	Click Me	1	-0.187	140	-10.71	0	0	0	1	0	0	0	3929
tRF-1:32-Glu-TTC-2	ENSMUST00000224011.1	Rnf180	Coding	Click Me	1	-0.139	140	-15.09	1	0	0	0	0	0	0	1858
tRF-1:32-Glu-TTC-2	ENSMUST00000022186.4	S100z	Coding	Click Me	1	-0.158	157	-15.27	0	0	0	1	0	0	0	1904
tRF-1:32-Glu-TTC-2	ENSMUST00000085206.10	Slc25a36	Coding	Click Me	1	-0.228	146	-10.22	0	0	0	0	0	1	0	5110
tRF-1:32-Glu-TTC-2	ENSMUST00000113481.8	Zfp318	Coding	Click Me	1	-0.156	145	-12.18	0	0	0	1	0	0	0	7129
tRF-1:32-Glu-TTC-2	ENSMUST00000020522.8	Pfkl	Coding	Click Me	1	-0.16	144	-10.59	0	0	0	1	0	0	0	1383
tRF-1:32-Glu-TTC-2	ENSMUST00000103121.9	D630003M21Rik	Coding	Click Me	1	-0.293	142	-13.88	0	0	1	0	0	0	0	1064
tRF-1:32-Glu-TTC-2	ENSMUST00000020399.5	Cpm	Coding	Click Me	1	-0.139	140	-11.14	0	0	0	0	0	1	0	3832
tRF-1:32-Glu-TTC-2	ENSMUST00000233984.1	Mapk13	Coding	Click Me	1	-0.311	155	-16.39	0	0	0	0	1	0	0	1723
tRF-1:32-Glu-TTC-2	ENSMUST00000145988.8	Dnhd1	Coding	Click Me	1	-0.134	143	-12.07	0	0	0	0	0	1	0	3911
tRF-1:32-Glu-TTC-2	ENSMUST00000161114.1	Slc37a2	Coding	Click Me	1	-0.232	145	-10.41	0	0	0	0	1	0	0	4681
tRF-1:32-Glu-TTC-2	ENSMUST00000048263.13	Wapl	Coding	Click Me	1	-0.132	149	-10.52	0	0	0	1	0	0	0	2293
tRF-1:32-Glu-TTC-2	ENSMUST00000088373.10	Srgap3	Coding	Click Me	1	-0.15	145	-11.66	0	0	0	0	1	0	0	4817
tRF-1:32-Glu-TTC-2	ENSMUST00000084953.12	Mark3	Coding	Click Me	1	-0.265	150	-11.15	0	0	0	0	1	0	0	4074
tRF-1:32-Glu-TTC-2	ENSMUST00000109197.7	Zfp62	Coding	Click Me	1	-0.339	144	-10.41	0	0	0	0	1	0	0	1195
tRF-1:32-Glu-TTC-2	ENSMUST00000023159.9	Mgrn1	Coding	Click Me	1	-0.24	148	-14.68	0	0	0	0	1	0	0	1287
tRF-1:32-Glu-TTC-2	ENSMUST00000058755.4	Fzd4	Coding	Click Me	1	-0.112	150	-11.53	0	0	0	1	0	0	0	4798
tRF-1:32-Glu-TTC-2	ENSMUST00000114942.8	Proser2	Coding	Click Me	1	-0.144	148	-13.71	0	0	0	1	0	0	0	2729
tRF-1:32-Glu-TTC-2	ENSMUST00000120630.2	Amz1	Coding	Click Me	1	-0.255	143	-11.17	0	0	0	0	1	0	0	2196
tRF-1:32-Glu-TTC-2	ENSMUST00000002048.7	Taco1	Coding	Click Me	1	-0.153	140	-10.44	0	0	0	0	0	1	0	3843
tRF-1:32-Glu-TTC-2	ENSMUST00000161971.7	Cd247	Coding	Click Me	1	-0.349	142	-11.19	0	0	0	0	1	0	0	2031
tRF-1:32-Glu-TTC-2	ENSMUST00000041782.3	Abt1	Coding	Click Me	1	-0.141	140	-12.76	0	0	0	0	0	1	0	3612
tRF-1:32-Glu-TTC-2	ENSMUST00000018765.3	Mmp8	Coding	Click Me	1	-0.23	142	-12.54	0	0	0	0	0	1	0	948
tRF-1:32-Glu-TTC-2	ENSMUST00000034048.12	Cfap97	Coding	Click Me	1	-0.143	149	-14.24	0	0	0	1	0	0	0	2875
tRF-1:32-Glu-TTC-2	ENSMUST00000067417.9	Gata4	Coding	Click Me	1	-0.145	140	-10.61	0	0	0	0	0	1	0	1453
tRF-1:32-Glu-TTC-2	ENSMUST00000091459.11	Fam172a	Coding	Click Me	1	-0.174	157	-19.65	0	0	0	0	0	1	0	2580
tRF-1:32-Glu-TTC-2	ENSMUST00000105336.8	Dot1l	Coding	Click Me	1	-0.121	141	-11.5	0	0	0	0	0	1	0	1966
tRF-1:32-Glu-TTC-2	ENSMUST00000187313.6	Cd247	Coding	Click Me	1	-0.349	142	-11.19	0	0	0	0	1	0	0	2182
tRF-1:32-Glu-TTC-2	ENSMUST00000066807.7	Ercc6	Coding	Click Me	1	-0.123	142	-10.61	0	0	0	0	0	1	0	3887
tRF-1:32-Glu-TTC-2	ENSMUST00000084721.7	Ak6	Coding	Click Me	1	-0.18	146	-11.97	0	0	0	1	0	0	0	745
tRF-1:32-Glu-TTC-2	ENSMUST00000074425.12	Efcab14	Coding	Click Me	1	-0.315	149	-13.67	0	0	0	0	1	0	0	2188
tRF-1:32-Glu-TTC-2	ENSMUST00000182666.7	Sh3d19	Coding	Click Me	1	-0.207	148	-14.15	0	0	0	0	0	1	0	3815
tRF-1:32-Glu-TTC-2	ENSMUST00000068351.13	Lrtm2	Coding	Click Me	1	-0.127	143	-12.34	0	0	0	1	0	0	0	1923
tRF-1:32-Glu-TTC-2	ENSMUST00000020741.11	Drg1	Coding	Click Me	1	-0.148	147	-12.32	0	0	0	0	0	1	0	5235
tRF-1:32-Glu-TTC-2	ENSMUST00000118364.1	Il23r	Coding	Click Me	1	-0.124	142	-10.88	0	0	0	0	1	0	0	5199
tRF-1:32-Glu-TTC-2	ENSMUST00000055931.4	Dusp18	Coding	Click Me	1	-0.104	152	-12.27	0	0	0	0	1	0	0	3718
tRF-1:32-Glu-TTC-2	ENSMUST00000037117.5	Gtf3c4	Coding	Click Me	1	-0.261	140	-10.22	0	0	0	0	0	1	0	4428
tRF-1:32-Glu-TTC-2	ENSMUST00000030797.3	Vamp3	Coding	Click Me	1	-0.212	145	-13.93	0	0	0	1	0	0	0	3840
tRF-1:32-Glu-TTC-2	ENSMUST00000034905.8	Gclc	Coding	Click Me	1	-0.106	140	-10.13	0	0	0	1	0	0	0	1238
tRF-1:32-Glu-TTC-2	ENSMUST00000058991.4	Olfr1352	Coding	Click Me	1	-0.103	148	-12.38	0	0	0	0	0	1	0	3182
tRF-1:32-Glu-TTC-2	ENSMUST00000023161.7	Srl	Coding	Click Me	1	-0.174	140	-10.15	0	0	0	1	0	0	0	2245
tRF-1:32-Glu-TTC-2	ENSMUST00000033999.7	Frg1	Coding	Click Me	1	-0.241	152	-17.91	0	0	0	0	0	1	0	4354
tRF-1:32-Glu-TTC-2	ENSMUST00000171462.7	Nkapd1	Coding	Click Me	1	-0.188	151	-14.74	0	0	0	1	0	0	0	2188
tRF-1:32-Glu-TTC-2	ENSMUST00000095349.5	Ubxn8	Coding	Click Me	1	-0.228	141	-10.22	0	0	0	1	0	0	0	1998
tRF-1:32-Glu-TTC-2	ENSMUST00000030091.9	Pole3	Coding	Click Me	1	-0.183	146	-13.35	0	0	0	1	0	0	0	1296
tRF-1:32-Glu-TTC-2	ENSMUST00000117782.7	Adamtsl4	Coding	Click Me	1	-0.115	146	-11.55	0	0	0	0	0	1	0	635
tRF-1:32-Glu-TTC-2	ENSMUST00000053306.7	Oxtr	Coding	Click Me	1	-0.128	143	-14.75	0	0	0	0	0	1	0	3390
tRF-1:32-Glu-TTC-2	ENSMUST00000031434.7	Rnf34	Coding	Click Me	1	-0.103	145	-10.7	0	0	0	0	0	1	0	3071
tRF-1:32-Glu-TTC-2	ENSMUST00000020444.15	Llph	Coding	Click Me	1	-0.146	142	-11.77	1	0	0	0	0	0	0	699
tRF-1:32-Glu-TTC-2	ENSMUST00000227811.1	Vmn1r47	Coding	Click Me	1	-0.387	143	-10.27	0	0	0	0	1	0	0	4657
tRF-1:32-Glu-TTC-2	ENSMUST00000060208.10	Myo3b	Coding	Click Me	1	-0.216	142	-10.22	0	0	0	1	0	0	0	2234
tRF-1:32-Glu-TTC-2	ENSMUST00000108182.9	Dcun1d1	Coding	Click Me	1	-0.117	157	-14.8	0	0	0	0	1	0	0	3515
tRF-1:32-Glu-TTC-2	ENSMUST00000041183.6	Meox2	Coding	Click Me	1	-0.223	150	-13.07	0	0	0	1	0	0	0	1157
tRF-1:32-Glu-TTC-2	ENSMUST00000207590.3	Olfr1301	Coding	Click Me	1	-0.127	142	-12.88	0	0	0	0	0	1	0	3663
tRF-1:32-Glu-TTC-2	ENSMUST00000062122.3	Cmya5	Coding	Click Me	1	-0.205	142	-10.22	0	0	0	0	0	1	0	629
tRF-1:32-Glu-TTC-2	ENSMUST00000048892.13	Icmt	Coding	Click Me	1	-0.251	144	-12.2	0	0	0	0	1	0	0	3941
tRF-1:32-Glu-TTC-2	ENSMUST00000034382.7	Zfp90	Coding	Click Me	1	-0.228	150	-15.58	0	0	0	0	0	1	0	1372
tRF-1:32-Glu-TTC-2	ENSMUST00000085177.4	Msl2	Coding	Click Me	1	-0.287	144	-10.61	0	0	0	0	0	1	0	2709
tRF-1:32-Glu-TTC-2	ENSMUST00000079584.2	Vmn1r32	Coding	Click Me	1	-0.235	148	-13.43	0	0	0	0	0	1	0	699
tRF-1:32-Glu-TTC-2	ENSMUST00000214328.2	Olfr679	Coding	Click Me	1	-0.227	140	-12.04	0	0	0	0	0	1	0	3977
tRF-1:32-Glu-TTC-2	ENSMUST00000215153.2	Olfr32	Coding	Click Me	1	-0.167	149	-10.18	0	0	0	0	1	0	0	1938
tRF-1:32-Glu-TTC-2	ENSMUST00000035113.10	Ss18l2	Coding	Click Me	1	-0.141	145	-10.99	0	0	0	0	1	0	0	3778
tRF-1:32-Glu-TTC-2	ENSMUST00000043112.8	Fbxo34	Coding	Click Me	1	-0.124	140	-10.13	0	0	0	1	0	0	0	682
tRF-1:32-Glu-TTC-2	ENSMUST00000084806.6	Dnah11	Coding	Click Me	1	-0.213	141	-11.16	0	0	0	0	0	1	0	401
tRF-1:32-Glu-TTC-2	ENSMUST00000170430.2	Pik3c2a	Coding	Click Me	1	-0.157	143	-10.22	0	0	0	0	0	1	0	2793
tRF-1:32-Glu-TTC-2	ENSMUST00000101151.9	Iqsec1	Coding	Click Me	1	-0.192	153	-15.39	0	0	0	0	1	0	0	2906
tRF-1:32-Glu-TTC-2	ENSMUST00000049388.8	Commd10	Coding	Click Me	1	-0.203	140	-11.14	0	0	0	0	0	1	0	928
tRF-1:32-Glu-TTC-2	ENSMUST00000029658.13	Enpep	Coding	Click Me	1	-0.133	144	-11.19	0	0	0	0	0	1	0	1106
tRF-1:32-Glu-TTC-2	ENSMUST00000109375.3	Elmo3	Coding	Click Me	1	-0.123	140	-10.9	0	0	0	0	0	1	0	1774
tRF-1:32-Glu-TTC-2	ENSMUST00000049166.4	Bet1	Coding	Click Me	1	-0.253	145	-13.14	0	0	0	0	1	0	0	3736
tRF-1:32-Glu-TTC-2	ENSMUST00000181969.7	Ndfip2	Coding	Click Me	1	-0.333	148	-11.04	0	0	0	0	1	0	0	1415
tRF-1:32-Glu-TTC-2	ENSMUST00000099547.3	Fam8a1	Coding	Click Me	1	-0.163	140	-10.65	0	0	0	0	0	1	0	2405
tRF-1:32-Glu-TTC-2	ENSMUST00000114246.3	Fzd7	Coding	Click Me	1	-0.181	147	-12.01	0	0	0	0	1	0	0	5068
tRF-1:32-Glu-TTC-2	ENSMUST00000111967.7	Vsig10	Coding	Click Me	1	-0.23	162	-19.91	0	0	0	1	0	0	0	2200
tRF-1:32-Glu-TTC-2	ENSMUST00000027312.10	Prim2	Coding	Click Me	1	-0.207	141	-12.32	0	0	0	0	0	1	0	360
tRF-1:32-Glu-TTC-2	ENSMUST00000160379.3	Cdk5r2	Coding	Click Me	1	-0.108	141	-10.22	0	0	0	1	0	0	0	1525
tRF-1:32-Glu-TTC-2	ENSMUST00000165365.2	Cd276	Coding	Click Me	1	-0.124	145	-12.78	0	0	0	1	0	0	0	2041
tRF-1:32-Glu-TTC-2	ENSMUST00000155571.1	Fam222b	Coding	Click Me	1	-0.145	143	-12.54	0	0	0	0	0	1	0	1397
tRF-1:32-Glu-TTC-2	ENSMUST00000089925.9	Dgkg	Coding	Click Me	1	-0.115	149	-10.52	0	0	0	0	1	0	0	4515
tRF-1:32-Glu-TTC-2	ENSMUST00000181071.7	Zfp429	Coding	Click Me	1	-0.182	145	-12.71	0	0	0	0	1	0	0	3481
tRF-1:32-Glu-TTC-2	ENSMUST00000095712.4	Slc5a7	Coding	Click Me	1	-0.204	148	-12.01	0	0	0	0	1	0	0	2928
tRF-1:32-Glu-TTC-2	ENSMUST00000022497.14	Spryd7	Coding	Click Me	1	-0.12	145	-10.73	0	0	0	0	1	0	0	5009
tRF-1:32-Glu-TTC-2	ENSMUST00000114876.8	Mbnl3	Coding	Click Me	1	-0.21	144	-12.71	0	0	0	0	0	1	0	927
tRF-1:32-Glu-TTC-2	ENSMUST00000095715.4	Bves	Coding	Click Me	1	-0.199	148	-15.23	0	0	0	0	0	1	0	3176
tRF-1:32-Glu-TTC-2	ENSMUST00000101120.10	Prok2	Coding	Click Me	1	-0.142	147	-12.32	0	0	0	0	0	1	0	1054
tRF-1:32-Glu-TTC-2	ENSMUST00000021296.6	Tmem101	Coding	Click Me	1	-0.147	141	-10.69	0	0	0	1	0	0	0	741
tRF-1:32-Glu-TTC-2	ENSMUST00000165017.1	Nolc1	Coding	Click Me	1	-0.196	143	-12.05	0	0	0	1	0	0	0	1960
tRF-1:32-Glu-TTC-2	ENSMUST00000113026.1	Rnf128	Coding	Click Me	1	-0.38	150	-13.31	0	0	0	0	1	0	0	1521
tRF-1:32-Glu-TTC-2	ENSMUST00000142742.8	Nos1	Coding	Click Me	1	-0.117	160	-19.08	0	0	0	1	0	0	0	5027
tRF-1:32-Glu-TTC-2	ENSMUST00000116495.7	Trappc2	Coding	Click Me	1	-0.279	142	-11.35	0	0	0	0	1	0	0	914
tRF-1:32-Glu-TTC-2	ENSMUST00000031009.7	Nsg1	Coding	Click Me	1	-0.134	152	-15.08	0	0	0	0	0	1	0	1479
tRF-1:32-Glu-TTC-2	ENSMUST00000146692.7	Tnfrsf22	Coding	Click Me	1	-0.176	149	-10.05	0	0	0	0	1	0	0	1722
tRF-1:32-Glu-TTC-2	ENSMUST00000025617.3	Rfk	Coding	Click Me	1	-0.358	146	-12.01	0	0	0	0	1	0	0	2166
tRF-1:32-Glu-TTC-2	ENSMUST00000168833.8	Fbxo34	Coding	Click Me	1	-0.123	140	-10.13	0	0	0	1	0	0	0	686
tRF-1:32-Glu-TTC-2	ENSMUST00000166240.7	Lrriq1	Coding	Click Me	1	-0.294	145	-12.01	0	0	0	0	1	0	0	1793
tRF-1:32-Glu-TTC-2	ENSMUST00000027367.13	Ctdsp1	Coding	Click Me	1	-0.358	145	-12.18	0	0	0	0	1	0	0	4448
tRF-1:32-Glu-TTC-2	ENSMUST00000111331.8	Arhgap1	Coding	Click Me	1	-0.198	145	-12.53	0	0	0	0	0	1	0	1426
tRF-1:32-Glu-TTC-2	ENSMUST00000063632.13	Sec31b	Coding	Click Me	1	-0.177	152	-17.55	0	0	0	0	0	1	0	1700
tRF-1:32-Glu-TTC-2	ENSMUST00000055349.14	Zfp943	Coding	Click Me	1	-0.376	145	-12.71	0	0	0	0	1	0	0	908
tRF-1:32-Glu-TTC-2	ENSMUST00000222404.1	Tes3-ps	Coding	Click Me	1	-0.356	157	-14.8	0	0	0	0	1	0	0	2160
tRF-1:32-Glu-TTC-2	ENSMUST00000002837.10	Tmed5	Coding	Click Me	1	-0.188	151	-16.63	0	0	0	0	0	1	0	2991
tRF-1:32-Glu-TTC-2	ENSMUST00000106341.8	Lef1	Coding	Click Me	1	-0.172	143	-11.25	0	0	0	1	0	0	0	1202
tRF-1:32-Glu-TTC-2	ENSMUST00000111828.3	Ddhd1	Coding	Click Me	1	-0.174	147	-12.01	0	0	0	0	1	0	0	7016
tRF-1:32-Glu-TTC-2	ENSMUST00000171767.7	Rcbtb2	Coding	Click Me	1	-0.331	150	-12.01	0	0	0	0	1	0	0	626
tRF-1:32-Glu-TTC-2	ENSMUST00000008907.13	Man1a2	Coding	Click Me	1	-0.298	146	-11.11	0	0	0	0	1	0	0	5405
tRF-1:32-Glu-TTC-2	ENSMUST00000153735.7	Pdlim2	Coding	Click Me	1	-0.134	146	-13.67	1	0	0	0	0	0	0	385
tRF-1:32-Glu-TTC-2	ENSMUST00000025774.9	Sf3b2	Coding	Click Me	1	-0.14	157	-19.46	0	0	0	0	0	1	0	545
tRF-1:32-Glu-TTC-2	ENSMUST00000119453.7	Ankrd60	Coding	Click Me	1	-0.232	145	-13.36	0	0	0	0	1	0	0	108
tRF-1:32-Glu-TTC-2	ENSMUST00000075588.12	Tnfrsf22	Coding	Click Me	1	-0.2	149	-10.05	0	0	0	0	1	0	0	3540
tRF-1:32-Glu-TTC-2	ENSMUST00000094481.1	Fv1	Coding	Click Me	1	-0.175	140	-10.61	0	0	0	0	0	1	0	2297
tRF-1:32-Glu-TTC-2	ENSMUST00000038769.2	S100g	Coding	Click Me	1	-0.211	140	-13.74	0	0	0	0	0	1	0	1532
tRF-1:32-Glu-TTC-2	ENSMUST00000032477.5	Necap1	Coding	Click Me	1	-0.149	145	-14.27	0	0	0	0	0	1	0	1553
tRF-1:32-Glu-TTC-2	ENSMUST00000031040.12	Cwh43	Coding	Click Me	1	-0.273	141	-12.02	0	0	0	0	0	1	0	339
tRF-1:32-Glu-TTC-2	ENSMUST00000187307.1	Wdr89	Coding	Click Me	1	-0.278	142	-11.12	0	0	0	0	0	1	0	921
tRF-1:32-Glu-TTC-2	ENSMUST00000215474.1	Siae	Coding	Click Me	1	-0.147	142	-10.61	0	0	0	0	0	1	0	3131
tRF-1:32-Glu-TTC-2	ENSMUST00000114513.8	Gls	Coding	Click Me	1	-0.109	151	-16.06	0	0	0	0	1	0	0	2713
tRF-1:32-Glu-TTC-2	ENSMUST00000058438.8	Dcaf7	Coding	Click Me	1	-0.178	150	-15.58	0	0	0	0	0	1	0	4482
tRF-1:32-Glu-TTC-2	ENSMUST00000054274.7	Lhfpl2	Coding	Click Me	1	-0.22	145	-19.45	0	0	1	0	0	0	0	3361
tRF-1:32-Glu-TTC-2	ENSMUST00000061446.7	Tmem130	Coding	Click Me	1	-0.144	144	-11.38	0	0	0	1	0	0	0	1428
tRF-1:32-Glu-TTC-2	ENSMUST00000037491.9	F13a1	Coding	Click Me	1	-0.175	142	-10.61	0	0	0	0	0	1	0	1587
tRF-1:32-Glu-TTC-2	ENSMUST00000203261.2	Smim4	Coding	Click Me	1	-0.323	142	-11.35	0	0	0	0	1	0	0	737
tRF-1:32-Glu-TTC-2	ENSMUST00000029575.11	Extl2	Coding	Click Me	1	-0.1	145	-18.7	0	1	0	0	0	0	0	4803
tRF-1:32-Glu-TTC-2	ENSMUST00000062437.9	Nkx2-6	Coding	Click Me	1	-0.123	144	-13.75	0	0	0	0	0	1	0	286
tRF-1:32-Glu-TTC-2	ENSMUST00000037198.9	Osgin2	Coding	Click Me	1	-0.124	150	-13.4	0	0	0	0	0	1	0	1616
tRF-1:32-Glu-TTC-2	ENSMUST00000093786.8	Rassf1	Coding	Click Me	1	-0.211	146	-13.17	0	0	0	1	0	0	0	722
tRF-1:32-Glu-TTC-2	ENSMUST00000011733.8	Fsd1	Coding	Click Me	1	-0.336	147	-12.01	0	0	0	0	1	0	0	367
tRF-1:32-Glu-TTC-2	ENSMUST00000029651.10	Gstcd	Coding	Click Me	2	-0.428	300	-28.55	0	0	0	1	0	1	0	5366
tRF-1:32-Glu-TTC-2	ENSMUST00000056740.5	Gldn	Coding	Click Me	1	-0.182	144	-13.86	0	0	0	0	0	1	0	2972
tRF-1:32-Glu-TTC-2	ENSMUST00000108250.2	Gm12353	Coding	Click Me	1	-0.163	140	-11.1	0	0	0	0	0	1	0	5214
tRF-1:32-Glu-TTC-2	ENSMUST00000170422.3	Evi2	Coding	Click Me	1	-0.255	148	-13.31	0	0	0	0	0	1	0	2028
tRF-1:32-Glu-TTC-2	ENSMUST00000193389.1	Pcdha6	Coding	Click Me	1	-0.177	154	-15.31	0	0	0	0	0	1	0	1842
tRF-1:32-Glu-TTC-2	ENSMUST00000035889.14	Myo6	Coding	Click Me	1	-0.123	146	-14.95	0	0	0	0	0	1	0	3858
tRF-1:32-Glu-TTC-2	ENSMUST00000022871.6	Sdc2	Coding	Click Me	1	-0.196	153	-14.52	0	0	0	0	0	1	0	3083
tRF-1:32-Glu-TTC-2	ENSMUST00000112140.7	Dync1i2	Coding	Click Me	1	-0.101	149	-12.01	0	0	0	0	1	0	0	2513
tRF-1:32-Glu-TTC-2	ENSMUST00000087517.9	Dido1	Coding	Click Me	1	-0.238	143	-10.22	0	0	0	0	1	0	0	1396
tRF-1:32-Glu-TTC-2	ENSMUST00000026568.9	Ptdss2	Coding	Click Me	1	-0.142	144	-13.67	0	0	0	0	0	1	0	2093
tRF-1:32-Glu-TTC-2	ENSMUST00000005108.9	Kdm5a	Coding	Click Me	1	-0.182	145	-14.28	0	0	0	0	0	1	0	5581
tRF-1:32-Glu-TTC-2	ENSMUST00000021141.13	P2rx1	Coding	Click Me	1	-0.16	146	-15.94	0	0	0	0	0	1	0	1074
tRF-1:32-Glu-TTC-2	ENSMUST00000027125.6	Coq10b	Coding	Click Me	1	-0.362	147	-10.52	0	0	0	0	1	0	0	4677
tRF-1:32-Glu-TTC-2	ENSMUST00000208455.2	Olfr193	Coding	Click Me	1	-0.258	146	-11.14	0	0	0	0	0	1	0	1755
tRF-1:32-Glu-TTC-2	ENSMUST00000226692.1	Vmn1r218	Coding	Click Me	1	-0.153	140	-10.17	0	0	0	0	1	0	0	8731
tRF-1:32-Glu-TTC-2	ENSMUST00000180502.7	Zfp850	Coding	Click Me	1	-0.166	140	-11.58	0	0	0	0	0	1	0	5097
tRF-1:32-Glu-TTC-2	ENSMUST00000009219.2	Cabp7	Coding	Click Me	1	-0.155	140	-10.59	0	0	0	0	0	1	0	1929
tRF-1:32-Glu-TTC-2	ENSMUST00000040622.2	P2ry13	Coding	Click Me	1	-0.155	149	-10.65	0	0	0	1	0	0	0	1448
tRF-1:32-Glu-TTC-2	ENSMUST00000033157.9	Ndufab1	Coding	Click Me	1	-0.188	145	-12.18	0	0	0	0	1	0	0	2944
tRF-1:32-Glu-TTC-2	ENSMUST00000023291.5	Mapk8ip2	Coding	Click Me	1	-0.222	140	-10.27	0	0	0	1	0	0	0	2760
tRF-1:32-Glu-TTC-2	ENSMUST00000024620.7	Riok2	Coding	Click Me	1	-0.236	154	-10.52	0	0	0	0	1	0	0	4584
tRF-1:32-Glu-TTC-2	ENSMUST00000049474.8	Fbxw8	Coding	Click Me	1	-0.143	140	-10.7	0	0	0	1	0	0	0	5022
tRF-1:32-Glu-TTC-2	ENSMUST00000011315.9	Vipr2	Coding	Click Me	1	-0.385	150	-14.01	0	0	0	0	1	0	0	1954
tRF-1:32-Glu-TTC-2	ENSMUST00000201972.1	Bend4	Coding	Click Me	1	-0.276	142	-11.35	0	0	0	0	1	0	0	6088
tRF-1:32-Glu-TTC-2	ENSMUST00000038252.3	B3galt2	Coding	Click Me	1	-0.12	141	-10.61	0	0	0	0	0	1	0	7218
tRF-1:32-Glu-TTC-2	ENSMUST00000084141.5	Zfp820	Coding	Click Me	1	-0.299	145	-11.78	0	0	0	0	1	0	0	1820
tRF-1:32-Glu-TTC-2	ENSMUST00000162686.7	Tyw5	Coding	Click Me	1	-0.129	157	-19.65	0	0	0	0	0	1	0	1658
tRF-1:32-Glu-TTC-2	ENSMUST00000209117.1	Zfand6	Coding	Click Me	1	-0.231	157	-17.89	0	0	0	0	1	0	0	2054
tRF-1:32-Glu-TTC-2	ENSMUST00000057557.13	Mcmbp	Coding	Click Me	1	-0.238	143	-11.78	0	0	0	0	0	1	0	3112
tRF-1:32-Glu-TTC-2	ENSMUST00000217289.1	Htr3a	Coding	Click Me	1	-0.2	147	-12.79	0	0	0	0	0	1	0	479
tRF-1:32-Glu-TTC-2	ENSMUST00000144164.7	Lyrm7	Coding	Click Me	1	-0.211	142	-11.08	0	0	0	1	0	0	0	2959
tRF-1:32-Glu-TTC-2	ENSMUST00000059045.7	Exosc4	Coding	Click Me	1	-0.194	145	-12.16	0	0	0	0	0	1	0	966
tRF-1:32-Glu-TTC-2	ENSMUST00000102864.4	Rel	Coding	Click Me	1	-0.129	140	-10.06	0	0	0	0	1	0	0	5425
tRF-1:32-Glu-TTC-2	ENSMUST00000077954.12	Sgcg	Coding	Click Me	1	-0.189	140	-12.29	0	0	0	0	0	1	0	2508
tRF-1:32-Glu-TTC-2	ENSMUST00000048605.2	Il5	Coding	Click Me	1	-0.189	140	-10.61	0	0	0	0	0	1	0	1092
tRF-1:32-Glu-TTC-2	ENSMUST00000217390.1	Olfr130	Coding	Click Me	1	-0.148	145	-12.07	0	0	0	1	0	0	0	4664
tRF-1:32-Glu-TTC-2	ENSMUST00000051572.7	Cavin2	Coding	Click Me	1	-0.184	161	-17.88	0	0	0	0	1	0	0	8648
tRF-1:32-Glu-TTC-2	ENSMUST00000033414.7	Slc6a14	Coding	Click Me	1	-0.312	147	-11.04	0	0	0	0	1	0	0	2350
tRF-1:32-Glu-TTC-2	ENSMUST00000172035.7	Gemin5	Coding	Click Me	1	-0.156	141	-10.83	0	0	0	0	1	0	0	2215
tRF-1:32-Glu-TTC-2	ENSMUST00000213601.1	Olfr481	Coding	Click Me	1	-0.265	143	-10.61	0	0	0	0	0	1	0	4090
tRF-1:32-Glu-TTC-2	ENSMUST00000121887.7	Fam107a	Coding	Click Me	1	-0.255	144	-12.53	0	0	0	0	1	0	0	2421
tRF-1:32-Glu-TTC-2	ENSMUST00000089162.4	Edem1	Coding	Click Me	1	-0.133	148	-11.57	0	0	0	1	0	0	0	6475
tRF-1:32-Glu-TTC-2	ENSMUST00000088307.4	BC003965	Coding	Click Me	1	-0.245	145	-10.35	0	0	0	0	0	1	0	2994
tRF-1:32-Glu-TTC-2	ENSMUST00000170719.1	Sftpa1	Coding	Click Me	1	-0.214	154	-13.67	0	0	0	0	1	0	0	5030
tRF-1:32-Glu-TTC-2	ENSMUST00000107635.6	Lrba	Coding	Click Me	1	-0.148	140	-10.49	0	0	0	1	0	0	0	1042
tRF-1:32-Glu-TTC-2	ENSMUST00000147695.7	Lonrf2	Coding	Click Me	2	-0.612	300	-22.08	0	0	0	0	2	0	0	4360
tRF-1:32-Glu-TTC-2	ENSMUST00000089157.10	Cenpm	Coding	Click Me	1	-0.115	147	-12.48	0	0	0	1	0	0	0	2864
tRF-1:32-Glu-TTC-2	ENSMUST00000047737.9	Irf8	Coding	Click Me	1	-0.151	140	-10.25	0	0	0	0	1	0	0	1964
tRF-1:32-Glu-TTC-2	ENSMUST00000015394.9	Mmp13	Coding	Click Me	1	-0.18	141	-16.17	0	0	1	0	0	0	0	1215
tRF-1:32-Glu-TTC-2	ENSMUST00000095457.10	Ptbp1	Coding	Click Me	1	-0.388	151	-14.51	0	0	0	0	1	0	0	1082
tRF-1:32-Glu-TTC-2	ENSMUST00000217253.1	Olfr299	Coding	Click Me	1	-0.297	149	-10.85	0	0	0	0	1	0	0	3152
tRF-1:32-Glu-TTC-2	ENSMUST00000023670.3	Clic6	Coding	Click Me	1	-0.198	141	-11.55	0	0	0	0	0	1	0	2254
tRF-1:32-Glu-TTC-2	ENSMUST00000113878.7	Arhgef9	Coding	Click Me	1	-0.235	147	-11.04	0	0	0	0	1	0	0	3029
tRF-1:32-Glu-TTC-2	ENSMUST00000107661.9	Snx11	Coding	Click Me	1	-0.183	140	-19.1	0	1	0	0	0	0	0	1169
tRF-1:32-Glu-TTC-2	ENSMUST00000110865.1	Adap1	Coding	Click Me	1	-0.267	155	-16.39	0	0	0	0	1	0	0	1172
tRF-1:32-Glu-TTC-2	ENSMUST00000001709.2	Hoxc5	Coding	Click Me	1	-0.182	140	-10.61	0	0	0	0	0	1	0	1998
tRF-1:32-Glu-TTC-2	ENSMUST00000008052.12	Hmgcll1	Coding	Click Me	1	-0.115	143	-11.64	0	0	0	1	0	0	0	2611
tRF-1:32-Glu-TTC-2	ENSMUST00000081335.12	Tgif2	Coding	Click Me	1	-0.179	142	-10.62	0	0	0	0	1	0	0	1922
tRF-1:32-Glu-TTC-2	ENSMUST00000100024.2	Fgf12	Coding	Click Me	1	-0.14	141	-10.22	0	0	0	1	0	0	0	6394
tRF-1:32-Glu-TTC-2	ENSMUST00000112863.7	Pak3	Coding	Click Me	1	-0.126	140	-12.05	0	0	0	0	0	1	0	6468
tRF-1:32-Glu-TTC-2	ENSMUST00000059599.9	Utp23	Coding	Click Me	1	-0.275	147	-11.76	0	0	0	0	1	0	0	2446
tRF-1:32-Glu-TTC-2	ENSMUST00000186057.6	Stat1	Coding	Click Me	1	-0.293	149	-12.24	0	0	0	0	1	0	0	1433
tRF-1:32-Glu-TTC-2	ENSMUST00000065211.8	Srr	Coding	Click Me	1	-0.146	148	-13.75	0	0	0	0	0	1	0	2518
tRF-1:32-Glu-TTC-2	ENSMUST00000026013.5	Maoa	Coding	Click Me	1	-0.151	147	-12.79	0	0	0	0	0	1	0	2443
tRF-1:32-Glu-TTC-2	ENSMUST00000066039.6	Cstf2t	Coding	Click Me	1	-0.211	142	-12.88	0	0	0	0	0	1	0	2016
tRF-1:32-Glu-TTC-2	ENSMUST00000023737.5	Dhh	Coding	Click Me	1	-0.1	140	-10.95	0	0	0	0	0	1	0	3596
tRF-1:32-Glu-TTC-2	ENSMUST00000036497.15	Prkar2b	Coding	Click Me	1	-0.243	140	-10.83	0	0	0	1	0	0	0	2183
tRF-1:32-Glu-TTC-2	ENSMUST00000090171.6	Adh7	Coding	Click Me	1	-0.191	140	-10.35	0	0	0	0	0	1	0	2905
tRF-1:32-Glu-TTC-2	ENSMUST00000067036.11	Bsg	Coding	Click Me	1	-0.378	148	-11.21	0	0	0	0	1	0	0	338
tRF-1:32-Glu-TTC-2	ENSMUST00000216415.1	Olfr186	Coding	Click Me	1	-0.193	145	-13.2	0	0	0	0	0	1	0	1179
tRF-1:32-Glu-TTC-2	ENSMUST00000050535.1	Msantd1	Coding	Click Me	1	-0.293	146	-13.38	0	0	0	0	0	1	0	3425
tRF-1:32-Glu-TTC-2	ENSMUST00000115662.8	Pcdha2	Coding	Click Me	2	-0.314	316	-32.89	0	0	0	1	0	1	0	2401
tRF-1:32-Glu-TTC-2	ENSMUST00000215369.1	Olfr446	Coding	Click Me	1	-0.224	144	-10.74	0	0	0	1	0	0	0	2982
tRF-1:32-Glu-TTC-2	ENSMUST00000106402.7	Camk2d	Coding	Click Me	1	-0.156	140	-11.65	0	0	0	0	0	1	0	4244
tRF-1:32-Glu-TTC-2	ENSMUST00000000542.13	Acvrl1	Coding	Click Me	1	-0.152	146	-13.51	0	0	0	0	0	1	0	1859
tRF-1:32-Glu-TTC-2	ENSMUST00000057067.9	Mei4	Coding	Click Me	1	-0.311	142	-10.88	0	0	0	0	1	0	0	1703
tRF-1:32-Glu-TTC-2	ENSMUST00000052927.10	Ppp1r16b	Coding	Click Me	1	-0.166	160	-19.08	0	0	0	1	0	0	0	4471
tRF-1:32-Glu-TTC-2	ENSMUST00000153470.8	Hikeshi	Coding	Click Me	1	-0.142	144	-17.86	0	0	1	0	0	0	0	3100
tRF-1:32-Glu-TTC-2	ENSMUST00000113054.8	Shroom3	Coding	Click Me	1	-0.38	153	-13.67	0	0	0	0	1	0	0	3309
tRF-1:32-Glu-TTC-2	ENSMUST00000013458.8	Adh4	Coding	Click Me	2	-0.429	299	-28.23	0	0	0	0	1	1	0	1948
tRF-1:32-Glu-TTC-2	ENSMUST00000117069.7	Ppil3	Coding	Click Me	1	-0.166	141	-11.93	0	0	0	0	0	1	0	2039
tRF-1:32-Glu-TTC-2	ENSMUST00000026899.3	Slc25a10	Coding	Click Me	1	-0.112	141	-10.27	0	0	0	0	1	0	0	4436
tRF-1:32-Glu-TTC-2	ENSMUST00000214541.1	Olfr1387	Coding	Click Me	1	-0.133	142	-10.88	0	0	0	0	1	0	0	3385
tRF-1:32-Glu-TTC-2	ENSMUST00000054344.10	Eogt	Coding	Click Me	1	-0.281	152	-12.27	0	0	0	0	1	0	0	2137
tRF-1:32-Glu-TTC-2	ENSMUST00000010211.6	Rassf1	Coding	Click Me	1	-0.211	146	-13.17	0	0	0	1	0	0	0	718
tRF-1:32-Glu-TTC-2	ENSMUST00000052716.7	Zfp759	Coding	Click Me	1	-0.347	141	-17.14	0	0	1	0	0	0	0	5303
tRF-1:32-Glu-TTC-2	ENSMUST00000042493.9	Ccdc115	Coding	Click Me	1	-0.176	140	-10.53	0	0	0	1	0	0	0	4200
tRF-1:32-Glu-TTC-2	ENSMUST00000035027.12	Clstn2	Coding	Click Me	1	-0.272	145	-12.01	0	0	0	0	1	0	0	3115
tRF-1:32-Glu-TTC-2	ENSMUST00000034228.15	Arl2bp	Coding	Click Me	1	-0.194	147	-11.36	0	0	0	0	1	0	0	1354
tRF-1:32-Glu-TTC-2	ENSMUST00000056028.10	Sbk1	Coding	Click Me	1	-0.124	141	-12.26	0	0	0	0	0	1	0	5359
tRF-1:32-Glu-TTC-2	ENSMUST00000216433.1	Cyp1a1	Coding	Click Me	1	-0.242	142	-10.74	0	0	0	1	0	0	0	942
tRF-1:32-Glu-TTC-2	ENSMUST00000029388.9	4930579G24Rik	Coding	Click Me	1	-0.207	143	-13.44	0	0	0	0	0	1	0	2435
tRF-1:32-Glu-TTC-2	ENSMUST00000093785.5	Naa80	Coding	Click Me	1	-0.143	142	-10.98	0	0	0	1	0	0	0	196
tRF-1:32-Glu-TTC-2	ENSMUST00000108379.7	BC024978	Coding	Click Me	1	-0.106	140	-10.61	0	0	0	0	0	1	0	2787
tRF-1:32-Glu-TTC-2	ENSMUST00000034612.6	Ddx25	Coding	Click Me	1	-0.163	157	-19.13	0	0	0	0	0	1	0	5349
tRF-1:32-Glu-TTC-2	ENSMUST00000111080.7	Ap1s1	Coding	Click Me	1	-0.152	140	-10.3	0	0	0	1	0	0	0	751
tRF-1:32-Glu-TTC-2	ENSMUST00000012281.7	Bmp5	Coding	Click Me	1	-0.256	144	-10.87	0	0	0	1	0	0	0	1822
tRF-1:32-Glu-TTC-2	ENSMUST00000022064.4	Lrrc14b	Coding	Click Me	1	-0.299	143	-11.17	0	0	0	0	1	0	0	3145
tRF-1:32-Glu-TTC-2	ENSMUST00000115059.7	Tenm1	Coding	Click Me	2	-0.398	287	-21.87	0	0	0	0	1	1	0	4599
tRF-1:32-Glu-TTC-2	ENSMUST00000013807.7	Pten	Coding	Click Me	1	-0.117	151	-14.12	0	0	0	0	1	0	0	6132
tRF-1:32-Glu-TTC-2	ENSMUST00000124001.7	Spdya	Coding	Click Me	1	-0.372	150	-13.67	0	0	0	0	1	0	0	296
tRF-1:32-Glu-TTC-2	ENSMUST00000057251.7	Olfr456	Coding	Click Me	1	-0.186	147	-10.52	0	0	0	1	0	0	0	2087
tRF-1:32-Glu-TTC-2	ENSMUST00000025965.11	Hells	Coding	Click Me	1	-0.141	153	-13.12	0	0	0	1	0	0	0	3655
tRF-1:32-Glu-TTC-2	ENSMUST00000080925.6	Olfr704	Coding	Click Me	1	-0.189	149	-14.04	0	0	0	1	0	0	0	860
tRF-1:32-Glu-TTC-2	ENSMUST00000111394.7	Ncor2	Coding	Click Me	1	-0.299	151	-14.12	0	0	0	0	1	0	0	332
tRF-1:32-Glu-TTC-2	ENSMUST00000047131.15	Ipo4	Coding	Click Me	1	-0.21	153	-12.72	0	0	0	1	0	0	0	511
tRF-1:32-Glu-TTC-2	ENSMUST00000218832.1	Olfr450	Coding	Click Me	1	-0.291	145	-10.7	0	0	0	0	0	1	0	676
tRF-1:32-Glu-TTC-2	ENSMUST00000048993.11	Polr3g	Coding	Click Me	1	-0.13	150	-16.28	0	0	0	0	0	1	0	4551
tRF-1:32-Glu-TTC-2	ENSMUST00000216868.1	Olfr695	Coding	Click Me	1	-0.159	149	-13.51	0	0	0	1	0	0	0	2701
tRF-1:32-Glu-TTC-2	ENSMUST00000027137.10	Slc40a1	Coding	Click Me	1	-0.116	144	-10.92	0	0	0	0	1	0	0	1631
tRF-1:32-Glu-TTC-2	ENSMUST00000193777.5	Pcdha6	Coding	Click Me	2	-0.314	316	-32.89	0	0	0	1	0	1	0	2401
tRF-1:32-Glu-TTC-2	ENSMUST00000032157.8	Gxylt2	Coding	Click Me	1	-0.256	140	-11.12	0	0	0	0	1	0	0	2452
tRF-1:32-Glu-TTC-2	ENSMUST00000031398.13	Hpd	Coding	Click Me	1	-0.107	149	-12.17	0	0	0	1	0	0	0	4183
tRF-1:32-Glu-TTC-2	ENSMUST00000189181.6	Pgr	Coding	Click Me	1	-0.172	166	-22.7	0	0	0	0	1	0	0	3488
tRF-1:32-Glu-TTC-2	ENSMUST00000026693.13	Zfp202	Coding	Click Me	1	-0.297	150	-13.31	0	0	0	0	1	0	0	1748
tRF-1:32-Glu-TTC-2	ENSMUST00000049016.11	Zfp532	Coding	Click Me	1	-0.15	141	-10.62	0	0	0	0	1	0	0	1987
tRF-1:32-Glu-TTC-2	ENSMUST00000028005.2	Mgst3	Coding	Click Me	1	-0.176	145	-12.48	0	0	0	1	0	0	0	4613
tRF-1:32-Glu-TTC-2	ENSMUST00000066568.5	Fpgt	Coding	Click Me	1	-0.152	145	-14.45	0	0	0	0	0	1	0	1702
tRF-1:32-Glu-TTC-2	ENSMUST00000105397.9	1810043G02Rik	Coding	Click Me	1	-0.265	153	-15.97	0	0	0	0	1	0	0	888
tRF-1:32-Glu-TTC-2	ENSMUST00000023154.2	Cldn1	Coding	Click Me	1	-0.189	157	-18.56	0	0	0	1	0	0	0	2419
tRF-1:32-Glu-TTC-2	ENSMUST00000090586.11	Phf21a	Coding	Click Me	1	-0.144	145	-13.18	0	0	0	1	0	0	0	4243
tRF-1:32-Glu-TTC-2	ENSMUST00000023775.8	Cela1	Coding	Click Me	1	-0.337	144	-11.48	0	0	0	0	1	0	0	3804
tRF-1:32-Glu-TTC-2	ENSMUST00000115091.1	Chchd3	Coding	Click Me	1	-0.234	145	-10.08	0	0	0	1	0	0	0	703
tRF-1:32-Glu-TTC-2	ENSMUST00000115333.8	Zfp182	Coding	Click Me	1	-0.248	142	-10.27	0	0	0	0	1	0	0	3880
tRF-1:32-Glu-TTC-2	ENSMUST00000215828.2	Olfr259	Coding	Click Me	1	-0.126	145	-13.11	0	0	0	0	1	0	0	2869
tRF-1:32-Glu-TTC-2	ENSMUST00000152080.7	Slc35e1	Coding	Click Me	1	-0.115	140	-11.56	0	0	0	1	0	0	0	5771
tRF-1:32-Glu-TTC-2	ENSMUST00000048568.5	Inka1	Coding	Click Me	1	-0.234	141	-10.18	0	0	0	1	0	0	0	244
tRF-1:32-Glu-TTC-2	ENSMUST00000034087.8	Snx20	Coding	Click Me	1	-0.165	145	-12.38	0	0	0	1	0	0	0	1219
tRF-1:32-Glu-TTC-2	ENSMUST00000102967.2	Hist1h4c	Coding	Click Me	1	-0.133	143	-13.44	0	0	0	0	0	1	0	1425
tRF-1:32-Glu-TTC-2	ENSMUST00000168386.8	Prr36	Coding	Click Me	1	-0.143	144	-14.28	0	0	0	0	0	1	0	976
tRF-1:32-Glu-TTC-2	ENSMUST00000039559.8	Thbs1	Coding	Click Me	1	-0.103	146	-10.97	0	0	0	1	0	0	0	2108
tRF-1:32-Glu-TTC-2	ENSMUST00000117217.7	Numb	Coding	Click Me	1	-0.343	140	-15.49	0	0	1	0	0	0	0	1405
tRF-1:32-Glu-TTC-2	ENSMUST00000052404.12	Epb41l5	Coding	Click Me	1	-0.28	150	-13.73	0	0	0	0	1	0	0	4096
tRF-1:32-Glu-TTC-2	ENSMUST00000047028.8	Lgalsl	Coding	Click Me	1	-0.213	155	-15.89	0	0	0	1	0	0	0	3040
tRF-1:32-Glu-TTC-2	ENSMUST00000034396.13	Mtmr2	Coding	Click Me	1	-0.211	140	-10.61	0	0	0	0	0	1	0	2272
tRF-1:32-Glu-TTC-2	ENSMUST00000105924.7	Tspan32	Coding	Click Me	1	-0.157	142	-12.54	1	0	0	0	0	0	0	718
tRF-1:32-Glu-TTC-2	ENSMUST00000118365.2	Card6	Coding	Click Me	1	-0.109	150	-13.31	0	0	0	0	1	0	0	2406
tRF-1:32-Glu-TTC-2	ENSMUST00000113560.7	Fnbp1	Coding	Click Me	1	-0.18	142	-10.27	0	0	0	0	1	0	0	2677
tRF-1:32-Glu-TTC-2	ENSMUST00000162292.7	Pde8b	Coding	Click Me	1	-0.249	140	-10.35	0	0	0	0	0	1	0	1615
tRF-1:32-Glu-TTC-2	ENSMUST00000030585.7	A3galt2	Coding	Click Me	1	-0.321	146	-11.86	0	0	0	0	1	0	0	2527
tRF-1:32-Glu-TTC-2	ENSMUST00000120990.1	Olfml1	Coding	Click Me	1	-0.165	143	-11.55	0	0	0	0	0	1	0	3075
tRF-1:32-Glu-TTC-2	ENSMUST00000003720.4	Crot	Coding	Click Me	1	-0.132	144	-10.61	0	0	0	1	0	0	0	4977
tRF-1:32-Glu-TTC-2	ENSMUST00000196449.4	Vcam1	Coding	Click Me	1	-0.214	140	-11.22	0	0	0	0	1	0	0	1404
tRF-1:32-Glu-TTC-2	ENSMUST00000025409.7	Lox	Coding	Click Me	1	-0.113	150	-13.51	0	0	0	1	0	0	0	1989
tRF-1:32-Glu-TTC-2	ENSMUST00000167571.7	Gspt1	Coding	Click Me	1	-0.403	150	-13.31	0	0	0	0	1	0	0	4592
tRF-1:32-Glu-TTC-2	ENSMUST00000102975.9	Mob3b	Coding	Click Me	1	-0.227	149	-13.5	0	0	0	0	1	0	0	4944
tRF-1:32-Glu-TTC-2	ENSMUST00000079451.12	Kcnk2	Coding	Click Me	1	-0.296	144	-11	0	0	0	0	1	0	0	1860
tRF-1:32-Glu-TTC-2	ENSMUST00000031446.6	Tmem132b	Coding	Click Me	1	-0.318	151	-14.12	0	0	0	0	1	0	0	4531
tRF-1:32-Glu-TTC-2	ENSMUST00000090275.4	Gjd2	Coding	Click Me	1	-0.219	141	-16.11	0	0	1	0	0	0	0	1428
tRF-1:32-Glu-TTC-2	ENSMUST00000178159.1	Zfp616	Coding	Click Me	1	-0.228	140	-10.61	0	0	0	0	0	1	0	1431
tRF-1:32-Glu-TTC-2	ENSMUST00000105421.9	Specc1l	Coding	Click Me	1	-0.294	158	-16.86	0	0	0	0	1	0	0	2864
tRF-1:32-Glu-TTC-2	ENSMUST00000026988.10	Arl10	Coding	Click Me	1	-0.278	157	-14.8	0	0	0	0	1	0	0	2253
tRF-1:32-Glu-TTC-2	ENSMUST00000170945.1	Skint3	Coding	Click Me	1	-0.234	152	-14.54	0	0	0	0	0	1	0	2261
tRF-1:32-Glu-TTC-2	ENSMUST00000029654.14	Glrb	Coding	Click Me	1	-0.231	142	-12.49	0	0	0	0	0	1	0	2215
tRF-1:32-Glu-TTC-2	ENSMUST00000093221.12	Ces3b	Coding	Click Me	1	-0.177	153	-14.95	0	0	0	0	0	1	0	2026
tRF-1:32-Glu-TTC-2	ENSMUST00000151477.7	Tnrc18	Coding	Click Me	1	-0.15	140	-11.73	0	0	0	1	0	0	0	915
tRF-1:32-Glu-TTC-2	ENSMUST00000016631.13	Ppfibp1	Coding	Click Me	1	-0.237	142	-11.06	0	0	0	0	1	0	0	1625
tRF-1:32-Glu-TTC-2	ENSMUST00000032551.7	Zik1	Coding	Click Me	1	-0.156	151	-16.3	0	0	0	0	0	1	0	2553
tRF-1:32-Glu-TTC-2	ENSMUST00000025083.13	Kif5b	Coding	Click Me	1	-0.238	144	-12.68	0	0	0	0	0	1	0	3067
tRF-1:32-Glu-TTC-2	ENSMUST00000115557.9	Zfp846	Coding	Click Me	1	-0.217	145	-14.28	0	0	0	0	0	1	0	10937
tRF-1:32-Glu-TTC-2	ENSMUST00000193839.5	Pcdha1	Coding	Click Me	2	-0.313	316	-32.89	0	0	0	1	0	1	0	2115
tRF-1:32-Glu-TTC-2	ENSMUST00000020930.13	Gna13	Coding	Click Me	1	-0.338	144	-10.93	0	0	0	0	1	0	0	4883
tRF-1:32-Glu-TTC-2	ENSMUST00000216259.1	Olfr161	Coding	Click Me	1	-0.103	141	-11.09	0	0	0	0	0	1	0	5984
tRF-1:32-Glu-TTC-2	ENSMUST00000069692.9	Zfp277	Coding	Click Me	1	-0.268	150	-11.04	0	0	0	0	0	1	0	671
tRF-1:32-Glu-TTC-2	ENSMUST00000168423.7	Smad2	Coding	Click Me	1	-0.131	141	-11.25	0	0	0	0	0	1	0	7157
tRF-1:32-Glu-TTC-2	ENSMUST00000111872.8	Arpp21	Coding	Click Me	1	-0.23	158	-14.76	0	0	0	1	0	0	0	674
tRF-1:32-Glu-TTC-2	ENSMUST00000032152.13	Prok2	Coding	Click Me	1	-0.142	147	-12.32	0	0	0	0	0	1	0	1481
tRF-1:32-Glu-TTC-2	ENSMUST00000037025.15	Kdm1b	Coding	Click Me	1	-0.435	150	-13.31	0	0	0	0	1	0	0	2907
tRF-1:32-Glu-TTC-2	ENSMUST00000099166.9	Ddx4	Coding	Click Me	1	-0.177	145	-12.01	0	0	0	0	1	0	0	3596
tRF-1:32-Glu-TTC-2	ENSMUST00000047627.13	Gpbp1	Coding	Click Me	1	-0.156	153	-17.06	0	0	0	0	0	1	0	5104
tRF-1:32-Glu-TTC-2	ENSMUST00000111868.9	Pik3c2g	Coding	Click Me	1	-0.148	146	-13.67	1	0	0	0	0	0	0	1341
tRF-1:32-Glu-TTC-2	ENSMUST00000060396.6	Slc25a46	Coding	Click Me	1	-0.251	156	-19.65	0	0	0	0	0	1	0	10548
tRF-1:32-Glu-TTC-2	ENSMUST00000041618.12	Taf4	Coding	Click Me	1	-0.213	150	-12.98	0	0	0	0	1	0	0	1293
tRF-1:32-Glu-TTC-2	ENSMUST00000162412.7	Pde8b	Coding	Click Me	1	-0.193	140	-10.35	0	0	0	0	0	1	0	2015
tRF-1:32-Glu-TTC-2	ENSMUST00000044373.5	Rfxap	Coding	Click Me	1	-0.136	146	-13.56	0	0	0	0	0	1	0	1355
tRF-1:32-Glu-TTC-2	ENSMUST00000043598.13	Tlcd2	Coding	Click Me	1	-0.152	141	-11.95	0	0	0	1	0	0	0	345
tRF-1:32-Glu-TTC-2	ENSMUST00000118820.7	Gpr174	Coding	Click Me	1	-0.243	140	-10.45	0	0	0	0	1	0	0	3176
tRF-1:32-Glu-TTC-2	ENSMUST00000166170.8	Nell2	Coding	Click Me	1	-0.137	147	-10.72	0	0	0	1	0	0	0	8461
tRF-1:32-Glu-TTC-2	ENSMUST00000167565.2	Zfp712	Coding	Click Me	1	-0.162	142	-10.22	0	0	0	0	0	1	0	1750
tRF-1:32-Glu-TTC-2	ENSMUST00000205131.1	Timp4	Coding	Click Me	1	-0.236	143	-10.64	0	0	0	1	0	0	0	347
tRF-1:32-Glu-TTC-2	ENSMUST00000029740.13	Rnf115	Coding	Click Me	1	-0.308	140	-10.22	0	0	0	0	1	0	0	3115
tRF-1:32-Glu-TTC-2	ENSMUST00000023294.14	Rabl2	Coding	Click Me	1	-0.163	140	-10.22	0	0	0	0	0	1	0	823
tRF-1:32-Glu-TTC-2	ENSMUST00000116403.8	Hnrnpk	Coding	Click Me	1	-0.208	140	-10.22	0	0	0	0	0	1	0	4968
tRF-1:32-Glu-TTC-2	ENSMUST00000026021.13	Msr1	Coding	Click Me	2	-0.382	282	-23.89	0	0	0	0	0	2	0	4317
tRF-1:32-Glu-TTC-2	ENSMUST00000111623.8	Ppfibp1	Coding	Click Me	1	-0.237	142	-11.06	0	0	0	0	1	0	0	1625
tRF-1:32-Glu-TTC-2	ENSMUST00000150844.2	Eri2	Coding	Click Me	1	-0.195	149	-11.9	0	0	0	1	0	0	0	1385
tRF-1:32-Glu-TTC-2	ENSMUST00000065785.3	Trim50	Coding	Click Me	1	-0.155	142	-10.83	0	0	0	1	0	0	0	351
tRF-1:32-Glu-TTC-2	ENSMUST00000029815.7	Cisd2	Coding	Click Me	1	-0.266	154	-13.1	0	0	0	0	1	0	0	2393
tRF-1:32-Glu-TTC-2	ENSMUST00000109267.8	Map3k1	Coding	Click Me	1	-0.278	147	-15.44	0	0	0	0	0	1	0	2472
tRF-1:32-Glu-TTC-2	ENSMUST00000044492.9	Akap9	Coding	Click Me	1	-0.246	143	-10.22	0	0	0	0	0	1	0	650
tRF-1:32-Glu-TTC-2	ENSMUST00000111523.2	Olfr1254	Coding	Click Me	1	-0.176	140	-10.61	0	0	0	0	0	1	0	1081
tRF-1:32-Glu-TTC-2	ENSMUST00000032469.12	Mbd4	Coding	Click Me	1	-0.279	153	-14.77	0	0	0	0	1	0	0	1788
tRF-1:32-Glu-TTC-2	ENSMUST00000153609.7	Snrpa1	Coding	Click Me	1	-0.161	150	-15.25	0	0	0	0	1	0	0	3939
tRF-1:32-Glu-TTC-2	ENSMUST00000080299.6	Yaf2	Coding	Click Me	1	-0.106	158	-18.66	0	0	0	0	0	1	0	8050
tRF-1:32-Glu-TTC-2	ENSMUST00000172282.7	Ptbp1	Coding	Click Me	1	-0.388	151	-14.51	0	0	0	0	1	0	0	1155
tRF-1:32-Glu-TTC-2	ENSMUST00000099358.4	Fam172a	Coding	Click Me	1	-0.229	157	-19.65	0	0	0	0	0	1	0	1126
tRF-1:32-Glu-TTC-2	ENSMUST00000044180.4	Npbwr1	Coding	Click Me	1	-0.143	141	-11.94	0	0	0	0	0	1	0	2597
tRF-1:32-Glu-TTC-2	ENSMUST00000217494.1	Olfr307	Coding	Click Me	1	-0.243	140	-10.44	0	0	0	0	1	0	0	3277
tRF-1:32-Glu-TTC-2	ENSMUST00000111941.1	Rgs13	Coding	Click Me	1	-0.288	143	-13.33	0	0	0	0	0	1	0	834
tRF-49:70-chrM.Trp-TCA	ENSMUST00000215317.1	Olfr727	Coding	Click Me	1	-0.177	148	-21.02	0	1	0	0	0	0	0	1193
tRF-49:70-chrM.Trp-TCA	ENSMUST00000146433.1	Gm11444	Coding	Click Me	1	-0.183	161	-31.31	0	0	0	1	0	0	0	5209
tRF-49:70-chrM.Trp-TCA	ENSMUST00000167673.1	P2ry10b	Coding	Click Me	1	-0.334	154	-25.5	0	0	0	0	1	0	0	4122
tRF-49:70-chrM.Trp-TCA	ENSMUST00000043414.11	Dennd3	Coding	Click Me	1	-0.174	157	-26.65	0	0	0	0	0	1	0	1326
tRF-49:70-chrM.Trp-TCA	ENSMUST00000032402.11	Bcat1	Coding	Click Me	1	-0.126	158	-22.71	0	0	0	0	1	0	0	6428
tRF-49:70-chrM.Trp-TCA	ENSMUST00000092584.5	Marcks	Coding	Click Me	1	-0.541	156	-22.61	0	0	0	0	1	0	0	2880
tRF-49:70-chrM.Trp-TCA	ENSMUST00000020958.8	Klhl29	Coding	Click Me	1	-0.217	170	-28.6	0	0	0	0	0	1	0	4009
tRF-49:70-chrM.Trp-TCA	ENSMUST00000031273.8	Cds1	Coding	Click Me	2	-0.414	303	-45.81	0	0	0	1	1	0	0	2299
tRF-49:70-chrM.Trp-TCA	ENSMUST00000068150.6	Adam11	Coding	Click Me	1	-0.113	155	-27.09	0	0	0	1	0	0	0	2580
tRF-49:70-chrM.Trp-TCA	ENSMUST00000060762.5	Zfp397	Coding	Click Me	1	-0.172	144	-21.02	0	1	0	0	0	0	0	4761
tRF-49:70-chrM.Trp-TCA	ENSMUST00000026537.12	Paox	Coding	Click Me	1	-0.203	141	-23.52	0	1	0	0	0	0	0	3104
tRF-49:70-chrM.Trp-TCA	ENSMUST00000059093.6	Coa6	Coding	Click Me	1	-0.283	158	-24.86	0	0	0	1	0	0	0	1477
tRF-49:70-chrM.Trp-TCA	ENSMUST00000112295.8	Gmppb	Coding	Click Me	1	-0.251	153	-27.68	0	0	0	0	1	0	0	1352
tRF-49:70-chrM.Trp-TCA	ENSMUST00000052725.14	Sc5d	Coding	Click Me	1	-0.12	144	-20.09	0	0	0	0	0	1	0	3909
tRF-49:70-chrM.Trp-TCA	ENSMUST00000022875.6	Ank	Coding	Click Me	1	-0.22	147	-26.5	0	0	0	0	1	0	0	3378
tRF-49:70-chrM.Trp-TCA	ENSMUST00000066747.13	Cd8a	Coding	Click Me	1	-0.146	154	-21.46	0	0	0	1	0	0	0	2270
tRF-49:70-chrM.Trp-TCA	ENSMUST00000206592.1	Stambp	Coding	Click Me	1	-0.273	148	-21.3	0	0	0	0	1	0	0	218
tRF-49:70-chrM.Trp-TCA	ENSMUST00000102600.3	Fndc5	Coding	Click Me	1	-0.203	159	-25.83	0	0	0	0	1	0	0	2053
tRF-49:70-chrM.Trp-TCA	ENSMUST00000218183.1	Bcl9l	Coding	Click Me	1	-0.151	142	-20.06	0	0	0	1	0	0	0	2113
tRF-49:70-chrM.Trp-TCA	ENSMUST00000177638.1	E030018B13Rik	Coding	Click Me	1	-0.43	147	-22.22	0	0	0	0	1	0	0	473
tRF-49:70-chrM.Trp-TCA	ENSMUST00000023359.12	Nde1	Coding	Click Me	1	-0.158	164	-25.72	0	0	0	0	0	1	0	1462
tRF-49:70-chrM.Trp-TCA	ENSMUST00000194478.5	Osbpl9	Coding	Click Me	1	-0.248	153	-24.91	0	0	0	1	0	0	0	643
tRF-49:70-chrM.Trp-TCA	ENSMUST00000006557.12	Elovl1	Coding	Click Me	1	-0.216	152	-26.26	0	0	0	1	0	0	0	834
tRF-49:70-chrM.Trp-TCA	ENSMUST00000206658.1	Kctd14	Coding	Click Me	1	-0.235	144	-21.02	0	1	0	0	0	0	0	1313
tRF-49:70-chrM.Trp-TCA	ENSMUST00000048044.11	Trub2	Coding	Click Me	1	-0.116	144	-21.02	0	1	0	0	0	0	0	7894
tRF-49:70-chrM.Trp-TCA	ENSMUST00000102738.3	Kti12	Coding	Click Me	1	-0.216	165	-23.81	0	0	0	1	0	0	0	3178
tRF-49:70-chrM.Trp-TCA	ENSMUST00000106094.8	Dlgap3	Coding	Click Me	1	-0.161	157	-24.16	0	0	0	1	0	0	0	654
tRF-49:70-chrM.Trp-TCA	ENSMUST00000093833.5	Fam219b	Coding	Click Me	1	-0.204	154	-26.04	0	0	0	1	0	0	0	3636
tRF-49:70-chrM.Trp-TCA	ENSMUST00000043150.5	Acsl5	Coding	Click Me	1	-0.13	148	-25.77	0	1	0	0	0	0	0	1362
tRF-49:70-chrM.Trp-TCA	ENSMUST00000101358.2	Gm614	Coding	Click Me	1	-0.364	159	-25.01	0	0	0	0	1	0	0	1328
tRF-49:70-chrM.Trp-TCA	ENSMUST00000121137.8	Rhpn1	Coding	Click Me	1	-0.125	161	-31.73	0	0	0	1	0	0	0	1258
tRF-49:70-chrM.Trp-TCA	ENSMUST00000036074.14	Gmip	Coding	Click Me	1	-0.217	144	-21.02	0	1	0	0	0	0	0	928
tRF-49:70-chrM.Trp-TCA	ENSMUST00000021757.4	Aoah	Coding	Click Me	2	-0.637	314	-51.75	0	0	0	0	1	1	0	1966
tRF-49:70-chrM.Trp-TCA	ENSMUST00000010038.9	Snap47	Coding	Click Me	1	-0.13	158	-28.29	0	0	1	0	0	0	0	5327
tRF-49:70-chrM.Trp-TCA	ENSMUST00000211887.1	Cnot1	Coding	Click Me	1	-0.261	159	-25.72	0	0	0	1	0	0	0	949
tRF-49:70-chrM.Trp-TCA	ENSMUST00000109616.8	Cbx7	Coding	Click Me	1	-0.327	146	-26.61	0	0	0	0	1	0	0	2294
tRF-49:70-chrM.Trp-TCA	ENSMUST00000048197.9	Rhod	Coding	Click Me	1	-0.177	150	-21.04	0	1	0	0	0	0	0	4100
tRF-49:70-chrM.Trp-TCA	ENSMUST00000104926.2	Fam170b	Coding	Click Me	1	-0.188	149	-19.67	0	0	0	0	0	1	0	443
tRF-49:70-chrM.Trp-TCA	ENSMUST00000122044.7	Csnk1e	Coding	Click Me	1	-0.308	147	-26.63	0	0	1	0	0	0	0	1459
tRF-49:70-chrM.Trp-TCA	ENSMUST00000226342.2	Dgkh	Coding	Click Me	1	-0.144	144	-18.14	0	0	0	0	1	0	0	11355
tRF-49:70-chrM.Trp-TCA	ENSMUST00000036592.14	1700034J05Rik	Coding	Click Me	1	-0.483	164	-27.78	0	0	0	0	1	0	0	1923
tRF-49:70-chrM.Trp-TCA	ENSMUST00000030884.9	Mfn2	Coding	Click Me	1	-0.421	163	-27.13	0	0	0	0	1	0	0	1790
tRF-49:70-chrM.Trp-TCA	ENSMUST00000077004.5	2010109I03Rik	Coding	Click Me	1	-0.19	148	-21.02	0	1	0	0	0	0	0	1512
tRF-49:70-chrM.Trp-TCA	ENSMUST00000163472.2	Gm17349	Coding	Click Me	3	-0.607	459	-70.61	0	0	1	2	0	0	0	2882
tRF-49:70-chrM.Trp-TCA	ENSMUST00000101426.10	Tmem176a	Coding	Click Me	1	-0.394	148	-26.03	0	0	0	0	1	0	0	2295
tRF-49:70-chrM.Trp-TCA	ENSMUST00000074792.6	Mtfmt	Coding	Click Me	1	-0.178	144	-21.02	0	1	0	0	0	0	0	2262
tRF-49:70-chrM.Trp-TCA	ENSMUST00000028052.11	Rabgap1l	Coding	Click Me	1	-0.228	144	-20.71	0	0	0	1	0	0	0	5047
tRF-49:70-chrM.Trp-TCA	ENSMUST00000028551.3	Emc4	Coding	Click Me	1	-0.257	148	-21.86	0	0	0	1	0	0	0	1062
tRF-49:70-chrM.Trp-TCA	ENSMUST00000053451.1	Gm9887	Coding	Click Me	1	-0.148	152	-27.35	0	0	1	0	0	0	0	4193
tRF-49:70-chrM.Trp-TCA	ENSMUST00000107358.8	Stat5b	Coding	Click Me	2	-0.211	284	-52.06	0	2	0	0	0	0	0	2365
tRF-49:70-chrM.Trp-TCA	ENSMUST00000071056.13	Bckdk	Coding	Click Me	2	-0.401	290	-43.53	0	1	0	0	1	0	0	2960
tRF-49:70-chrM.Trp-TCA	ENSMUST00000215102.1	Olfr718-ps1	Coding	Click Me	1	-0.145	144	-21.02	0	1	0	0	0	0	0	3218
tRF-49:70-chrM.Trp-TCA	ENSMUST00000110384.8	Ripor2	Coding	Click Me	1	-0.186	150	-20.41	0	0	0	0	0	1	0	2131
tRF-49:70-chrM.Trp-TCA	ENSMUST00000179422.7	Ecsit	Coding	Click Me	1	-0.192	144	-21.02	0	1	0	0	0	0	0	531
tRF-49:70-chrM.Trp-TCA	ENSMUST00000117085.1	Abhd17c	Coding	Click Me	2	-0.855	319	-57.16	0	0	0	0	2	0	0	2906
tRF-49:70-chrM.Trp-TCA	ENSMUST00000042957.5	Krt75	Coding	Click Me	2	-0.656	307	-52.03	0	1	0	0	1	0	0	1539
tRF-49:70-chrM.Trp-TCA	ENSMUST00000163605.2	Ddx11	Coding	Click Me	1	-0.224	144	-21.02	0	1	0	0	0	0	0	3938
tRF-49:70-chrM.Trp-TCA	ENSMUST00000171376.7	Ppt2	Coding	Click Me	1	-0.139	154	-28.23	0	0	0	1	0	0	0	680
tRF-49:70-chrM.Trp-TCA	ENSMUST00000135884.7	Nme1	Coding	Click Me	2	-0.458	316	-42.67	0	0	0	1	1	0	0	2423
tRF-49:70-chrM.Trp-TCA	NM_001327810	Ankfn1	Coding	Click Me	1	-0.121	150	-22.4	0	0	0	0	0	1	0	1385
tRF-49:70-chrM.Trp-TCA	ENSMUST00000143203.7	Stxbp4	Coding	Click Me	1	-0.136	144	-21.02	0	1	0	0	0	0	0	4108
tRF-49:70-chrM.Trp-TCA	ENSMUST00000047726.11	Slc39a2	Coding	Click Me	1	-0.451	162	-24.94	0	0	0	0	1	0	0	1214
tRF-49:70-chrM.Trp-TCA	ENSMUST00000006587.6	Tmem189	Coding	Click Me	1	-0.207	148	-21.85	0	0	0	0	0	1	0	1467
tRF-49:70-chrM.Trp-TCA	ENSMUST00000025851.3	Dpp3	Coding	Click Me	1	-0.266	149	-20.8	0	0	0	1	0	0	0	393
tRF-49:70-chrM.Trp-TCA	ENSMUST00000124745.7	Dda1	Coding	Click Me	1	-0.107	141	-25.47	0	1	0	0	0	0	0	1497
tRF-49:70-chrM.Trp-TCA	ENSMUST00000199942.4	Lgi2	Coding	Click Me	1	-0.513	144	-20.08	0	0	0	0	1	0	0	4446
tRF-49:70-chrM.Trp-TCA	ENSMUST00000088345.11	Mapk8ip3	Coding	Click Me	1	-0.23	149	-19.78	0	0	0	0	0	1	0	1415
tRF-49:70-chrM.Trp-TCA	ENSMUST00000041761.6	Prss23	Coding	Click Me	1	-0.179	153	-25.08	1	0	0	0	0	0	0	1935
tRF-49:70-chrM.Trp-TCA	ENSMUST00000025058.14	Anks1	Coding	Click Me	2	-0.45	300	-50.86	0	0	0	0	2	0	0	3383
tRF-49:70-chrM.Trp-TCA	ENSMUST00000047257.14	Katnal1	Coding	Click Me	1	-0.307	160	-29.9	0	0	0	0	1	0	0	5710
tRF-49:70-chrM.Trp-TCA	ENSMUST00000033483.4	Ccdc22	Coding	Click Me	1	-0.178	143	-27.71	0	1	0	0	0	0	0	250
tRF-49:70-chrM.Trp-TCA	ENSMUST00000028553.3	Nop10	Coding	Click Me	1	-0.197	144	-21.02	0	1	0	0	0	0	0	2228
tRF-49:70-chrM.Trp-TCA	ENSMUST00000092569.12	Ccdc43	Coding	Click Me	1	-0.274	150	-22.04	0	0	0	1	0	0	0	1626
tRF-49:70-chrM.Trp-TCA	ENSMUST00000085077.4	Arnt2	Coding	Click Me	1	-0.142	142	-26.8	0	1	0	0	0	0	0	3783
tRF-49:70-chrM.Trp-TCA	ENSMUST00000029699.12	Lmna	Coding	Click Me	1	-0.224	151	-17.68	0	0	0	1	0	0	0	2422
tRF-49:70-chrM.Trp-TCA	ENSMUST00000171686.8	Rpp40	Coding	Click Me	1	-0.372	153	-26.8	0	0	0	0	1	0	0	3259
tRF-49:70-chrM.Trp-TCA	ENSMUST00000106656.1	Amigo1	Coding	Click Me	1	-0.376	166	-32.52	0	0	0	0	1	0	0	3618
tRF-49:70-chrM.Trp-TCA	ENSMUST00000033643.5	Glt28d2	Coding	Click Me	1	-0.167	144	-21.02	0	1	0	0	0	0	0	1821
tRF-49:70-chrM.Trp-TCA	ENSMUST00000032738.6	Chrna7	Coding	Click Me	1	-0.396	155	-22.77	0	0	0	0	1	0	0	4036
tRF-49:70-chrM.Trp-TCA	ENSMUST00000020334.8	Usp15	Coding	Click Me	1	-0.125	149	-25.98	0	0	1	0	0	0	0	8509
tRF-49:70-chrM.Trp-TCA	ENSMUST00000041804.7	Lmtk2	Coding	Click Me	1	-0.128	152	-27.69	0	0	0	1	0	0	0	3460
tRF-49:70-chrM.Trp-TCA	ENSMUST00000084662.11	Dnajb5	Coding	Click Me	1	-0.237	159	-25.44	0	0	0	1	0	0	0	1874
tRF-49:70-chrM.Trp-TCA	ENSMUST00000035129.13	Ephb1	Coding	Click Me	1	-0.233	146	-16.64	0	0	0	0	0	1	0	1358
tRF-49:70-chrM.Trp-TCA	ENSMUST00000074740.4	Olfr920	Coding	Click Me	1	-0.234	173	-32.48	0	0	0	0	0	1	0	2526
tRF-49:70-chrM.Trp-TCA	ENSMUST00000184858.1	Mroh6	Coding	Click Me	1	-0.126	152	-31.56	0	0	1	0	0	0	0	4868
tRF-49:70-chrM.Trp-TCA	ENSMUST00000057169.4	Emilin3	Coding	Click Me	1	-0.404	157	-26.25	0	0	0	0	1	0	0	1113
tRF-49:70-chrM.Trp-TCA	ENSMUST00000179685.2	Smlr1	Coding	Click Me	1	-0.297	151	-23.2	0	0	0	0	1	0	0	2164
tRF-49:70-chrM.Trp-TCA	ENSMUST00000161289.1	Ces4a	Coding	Click Me	1	-0.192	143	-24.23	0	1	0	0	0	0	0	589
tRF-49:70-chrM.Trp-TCA	ENSMUST00000105687.8	Tmem201	Coding	Click Me	1	-0.409	156	-28.84	0	0	0	0	1	0	0	1606
tRF-49:70-chrM.Trp-TCA	ENSMUST00000053265.7	Lyrm4	Coding	Click Me	2	-0.388	307	-52.63	1	0	0	1	0	0	0	1042
tRF-49:70-chrM.Trp-TCA	ENSMUST00000115227.9	Bdh1	Coding	Click Me	1	-0.319	145	-29.12	0	0	1	0	0	0	0	1831
tRF-49:70-chrM.Trp-TCA	ENSMUST00000037580.12	Kcnt1	Coding	Click Me	1	-0.164	150	-26.26	0	0	0	1	0	0	0	2156
tRF-49:70-chrM.Trp-TCA	ENSMUST00000084852.12	Numa1	Coding	Click Me	1	-0.287	149	-24.79	0	0	0	0	0	1	0	942
tRF-49:70-chrM.Trp-TCA	ENSMUST00000028465.13	P2rx3	Coding	Click Me	1	-0.444	157	-29.94	0	0	0	0	1	0	0	2465
tRF-49:70-chrM.Trp-TCA	ENSMUST00000006952.8	Saa4	Coding	Click Me	2	-0.503	305	-48.77	0	1	0	0	1	0	0	2978
tRF-49:70-chrM.Trp-TCA	ENSMUST00000044000.11	4930447C04Rik	Coding	Click Me	1	-0.157	144	-21.02	0	1	0	0	0	0	0	1036
tRF-49:70-chrM.Trp-TCA	ENSMUST00000081851.3	Tmeff2	Coding	Click Me	2	-0.25	299	-52.06	1	0	0	1	0	0	0	2686
tRF-49:70-chrM.Trp-TCA	ENSMUST00000030340.14	Scp2	Coding	Click Me	1	-0.204	144	-24.02	0	0	1	0	0	0	0	3154
tRF-49:70-chrM.Trp-TCA	ENSMUST00000025048.6	1700061G19Rik	Coding	Click Me	1	-0.209	140	-19.8	0	1	0	0	0	0	0	1964
tRF-49:70-chrM.Trp-TCA	ENSMUST00000068058.13	Usp46	Coding	Click Me	1	-0.165	146	-32.17	0	1	0	0	0	0	0	3310
tRF-49:70-chrM.Trp-TCA	ENSMUST00000034570.6	Pts	Coding	Click Me	2	-0.646	311	-48.03	0	0	0	1	1	0	0	1085
tRF-49:70-chrM.Trp-TCA	ENSMUST00000112777.8	Dcp1b	Coding	Click Me	1	-0.189	159	-27.11	0	0	0	1	0	0	0	3004
tRF-49:70-chrM.Trp-TCA	ENSMUST00000019439.8	Tmem129	Coding	Click Me	1	-0.14	160	-28.84	0	0	0	0	0	1	0	1150
tRF-49:70-chrM.Trp-TCA	ENSMUST00000114312.1	Grin1	Coding	Click Me	1	-0.351	156	-29.7	0	0	0	0	1	0	0	879
tRF-49:70-chrM.Trp-TCA	ENSMUST00000092394.3	Gm11733	Coding	Click Me	2	-0.573	318	-60.52	0	0	1	1	0	0	0	1874
tRF-49:70-chrM.Trp-TCA	ENSMUST00000178876.7	1600014C10Rik	Coding	Click Me	1	-0.376	155	-26.19	0	0	0	0	1	0	0	2773
tRF-49:70-chrM.Trp-TCA	ENSMUST00000074613.3	Acyp2	Coding	Click Me	1	-0.197	149	-19.69	0	0	0	1	0	0	0	4933
tRF-49:70-chrM.Trp-TCA	ENSMUST00000053015.6	Pcbp1	Coding	Click Me	1	-0.134	141	-23.16	0	1	0	0	0	0	0	525
tRF-49:70-chrM.Trp-TCA	ENSMUST00000031131.10	Uchl1	Coding	Click Me	1	-0.163	169	-36.9	0	0	0	1	0	0	0	306
tRF-49:70-chrM.Trp-TCA	ENSMUST00000057019.8	Aplnr	Coding	Click Me	1	-0.175	149	-24.3	0	0	0	1	0	0	0	2157
tRF-49:70-chrM.Trp-TCA	ENSMUST00000035667.8	Trim62	Coding	Click Me	1	-0.303	167	-27.04	0	0	0	0	0	1	0	4105
tRF-49:70-chrM.Trp-TCA	ENSMUST00000005256.13	Ndrg1	Coding	Click Me	1	-0.144	155	-24.72	0	0	0	0	0	1	0	5165
tRF-49:70-chrM.Trp-TCA	ENSMUST00000001975.4	Nacc1	Coding	Click Me	1	-0.154	144	-25.64	0	0	0	0	1	0	0	3361
tRF-49:70-chrM.Trp-TCA	ENSMUST00000061274.8	Gpr156	Coding	Click Me	1	-0.206	160	-21.2	0	0	0	0	0	1	0	1710
tRF-49:70-chrM.Trp-TCA	ENSMUST00000061706.6	E130311K13Rik	Coding	Click Me	2	-0.521	284	-51.01	0	1	1	0	0	0	0	1519
tRF-49:70-chrM.Trp-TCA	ENSMUST00000166837.1	Gm17067	Coding	Click Me	1	-0.237	157	-23.99	0	0	0	1	0	0	0	4594
tRF-49:70-chrM.Trp-TCA	ENSMUST00000105693.1	Nmnat1	Coding	Click Me	1	-0.506	162	-24.56	0	0	0	0	1	0	0	197
tRF-49:70-chrM.Trp-TCA	ENSMUST00000027974.6	Atf6	Coding	Click Me	1	-0.332	152	-23.18	0	0	0	0	1	0	0	5422
tRF-49:70-chrM.Trp-TCA	ENSMUST00000166277.4	Cfap97d2	Coding	Click Me	1	-0.218	157	-28.83	0	0	0	1	0	0	0	417
tRF-49:70-chrM.Trp-TCA	ENSMUST00000001836.10	Pwp1	Coding	Click Me	1	-0.206	162	-21.66	0	0	0	1	0	0	0	2022
tRF-49:70-chrM.Trp-TCA	ENSMUST00000054930.6	Ptx4	Coding	Click Me	1	-0.198	144	-21.02	0	1	0	0	0	0	0	2284
tRF-49:70-chrM.Trp-TCA	ENSMUST00000030643.2	Extl1	Coding	Click Me	1	-0.266	152	-23.39	0	0	0	0	1	0	0	4710
tRF-49:70-chrM.Trp-TCA	ENSMUST00000017629.11	Top2b	Coding	Click Me	1	-0.339	142	-19.75	0	0	0	1	0	0	0	1480
tRF-49:70-chrM.Trp-TCA	ENSMUST00000040880.8	Map6d1	Coding	Click Me	1	-0.138	146	-23.2	0	1	0	0	0	0	0	2653
tRF-49:70-chrM.Trp-TCA	ENSMUST00000217377.1	Olfr177	Coding	Click Me	1	-0.16	141	-23.81	0	1	0	0	0	0	0	1264
tRF-49:70-chrM.Trp-TCA	ENSMUST00000067384.5	Rhob	Coding	Click Me	2	-0.58	293	-49.86	0	0	0	0	1	1	0	3331
tRF-49:70-chrM.Trp-TCA	ENSMUST00000220008.1	Olfr213	Coding	Click Me	1	-0.12	156	-21.21	0	0	0	1	0	0	0	2854
tRF-49:70-chrM.Trp-TCA	ENSMUST00000051756.7	Il31ra	Coding	Click Me	3	-0.63	430	-60.74	0	1	0	1	0	1	0	2688
tRF-49:70-chrM.Trp-TCA	ENSMUST00000065441.6	Gpr21	Coding	Click Me	1	-0.271	156	-23.4	0	0	0	0	0	1	0	3813
tRF-49:70-chrM.Trp-TCA	ENSMUST00000171688.8	Ang	Coding	Click Me	1	-0.112	156	-25.77	0	0	0	0	0	1	0	2215
tRF-49:70-chrM.Trp-TCA	ENSMUST00000076306.11	Prkag2	Coding	Click Me	1	-0.311	150	-20.7	0	0	0	0	0	1	0	1108
tRF-49:70-chrM.Trp-TCA	ENSMUST00000059899.2	Mmgt1	Coding	Click Me	1	-0.453	163	-24.61	0	0	0	0	1	0	0	3641
tRF-49:70-chrM.Trp-TCA	ENSMUST00000176325.7	Apobec3	Coding	Click Me	2	-0.35	307	-42.68	0	0	0	2	0	0	0	4485
tRF-49:70-chrM.Trp-TCA	ENSMUST00000100123.9	Lrrc74b	Coding	Click Me	1	-0.152	142	-25.41	0	1	0	0	0	0	0	2827
tRF-49:70-chrM.Trp-TCA	ENSMUST00000146760.6	Flt3l	Coding	Click Me	1	-0.145	144	-21.02	0	1	0	0	0	0	0	2060
tRF-49:70-chrM.Trp-TCA	ENSMUST00000043521.4	Sec22a	Coding	Click Me	1	-0.143	160	-26.58	0	0	0	1	0	0	0	2962
tRF-49:70-chrM.Trp-TCA	ENSMUST00000055947.9	Samd14	Coding	Click Me	1	-0.367	160	-30.62	0	0	0	0	1	0	0	1354
tRF-49:70-chrM.Trp-TCA	ENSMUST00000023615.6	Vps26c	Coding	Click Me	2	-0.4	303	-53.31	0	1	0	0	1	0	0	2309
tRF-49:70-chrM.Trp-TCA	ENSMUST00000100335.9	Mrc2	Coding	Click Me	1	-0.138	142	-16.96	0	0	0	1	0	0	0	4622
tRF-49:70-chrM.Trp-TCA	ENSMUST00000180463.2	Rd3	Coding	Click Me	1	-0.205	144	-20.25	0	1	0	0	0	0	0	2780
tRF-49:70-chrM.Trp-TCA	ENSMUST00000110774.7	Mga	Coding	Click Me	2	-0.338	303	-46.26	0	0	0	0	2	0	0	4616
tRF-49:70-chrM.Trp-TCA	ENSMUST00000109820.4	Bcl2l1	Coding	Click Me	1	-0.18	157	-29.39	0	0	0	1	0	0	0	1473
tRF-49:70-chrM.Trp-TCA	ENSMUST00000017534.14	Aldoc	Coding	Click Me	1	-0.234	141	-22.07	0	1	0	0	0	0	0	1427
tRF-49:70-chrM.Trp-TCA	ENSMUST00000078525.6	Rnf150	Coding	Click Me	1	-0.254	149	-22.41	0	0	0	1	0	0	0	7717
tRF-49:70-chrM.Trp-TCA	ENSMUST00000025704.2	Cdca5	Coding	Click Me	1	-0.416	143	-22.6	0	0	0	0	1	0	0	2336
tRF-49:70-chrM.Trp-TCA	ENSMUST00000049020.8	Irgq	Coding	Click Me	1	-0.129	151	-25.75	0	0	0	1	0	0	0	4113
tRF-49:70-chrM.Trp-TCA	ENSMUST00000195656.5	Slamf6	Coding	Click Me	1	-0.138	152	-23.47	0	0	0	0	1	0	0	4480
tRF-49:70-chrM.Trp-TCA	ENSMUST00000180110.8	Atxn1	Coding	Click Me	1	-0.107	146	-24.99	1	0	0	0	0	0	0	8190
tRF-49:70-chrM.Trp-TCA	ENSMUST00000167868.7	Slc38a3	Coding	Click Me	2	-0.313	281	-51.84	0	2	0	0	0	0	0	2692
tRF-49:70-chrM.Trp-TCA	ENSMUST00000004936.9	Ccl24	Coding	Click Me	1	-0.21	150	-21.02	0	1	0	0	0	0	0	858
tRF-49:70-chrM.Trp-TCA	ENSMUST00000119026.7	Tmem132c	Coding	Click Me	1	-0.219	149	-22.76	0	0	0	1	0	0	0	1703
tRF-49:70-chrM.Trp-TCA	ENSMUST00000043718.11	2310007B03Rik	Coding	Click Me	1	-0.183	154	-20.85	0	0	0	1	0	0	0	1200
tRF-49:70-chrM.Trp-TCA	ENSMUST00000230542.1	Kansl2	Coding	Click Me	1	-0.262	153	-22	0	0	0	0	0	1	0	1764
tRF-49:70-chrM.Trp-TCA	ENSMUST00000112370.8	Mfsd4a	Coding	Click Me	5	-1.482	716	-121.34	0	1	4	0	0	0	0	953
tRF-49:70-chrM.Trp-TCA	ENSMUST00000056034.12	Atat1	Coding	Click Me	2	-0.4	315	-51.62	0	1	0	0	0	1	0	987
tRF-49:70-chrM.Trp-TCA	ENSMUST00000006785.7	Slc17a1	Coding	Click Me	1	-0.24	161	-22.29	0	0	0	0	0	1	0	2514
tRF-49:70-chrM.Trp-TCA	ENSMUST00000095070.3	Dnajc25	Coding	Click Me	1	-0.454	151	-23	0	0	0	0	1	0	0	4836
tRF-49:70-chrM.Trp-TCA	ENSMUST00000138532.7	Syvn1	Coding	Click Me	1	-0.443	155	-27.32	0	0	0	0	1	0	0	1061
tRF-49:70-chrM.Trp-TCA	ENSMUST00000039327.10	Dagla	Coding	Click Me	1	-0.122	148	-28.06	1	0	0	0	0	0	0	2399
tRF-49:70-chrM.Trp-TCA	ENSMUST00000107670.2	Olfr273	Coding	Click Me	1	-0.123	141	-22.74	1	0	0	0	0	0	0	3404
tRF-49:70-chrM.Trp-TCA	ENSMUST00000189061.6	Rgs1	Coding	Click Me	1	-0.176	161	-26.13	0	0	0	0	1	0	0	3006
tRF-49:70-chrM.Trp-TCA	ENSMUST00000080210.9	Slc1a2	Coding	Click Me	1	-0.115	163	-27.1	0	0	0	0	1	0	0	9250
tRF-49:70-chrM.Trp-TCA	ENSMUST00000173867.7	Cct4	Coding	Click Me	1	-0.107	149	-31.06	0	1	0	0	0	0	0	3099
tRF-49:70-chrM.Trp-TCA	ENSMUST00000045748.6	Pdk3	Coding	Click Me	1	-0.219	148	-22.12	0	0	0	0	0	1	0	9930
tRF-49:70-chrM.Trp-TCA	ENSMUST00000021028.4	Itgb3	Coding	Click Me	1	-0.292	147	-21.72	0	0	0	0	1	0	0	3343
tRF-49:70-chrM.Trp-TCA	ENSMUST00000025279.5	Npc1	Coding	Click Me	1	-0.1	152	-24.16	0	0	0	1	0	0	0	1230
tRF-49:70-chrM.Trp-TCA	ENSMUST00000121357.7	Gramd1b	Coding	Click Me	1	-0.471	155	-20.71	0	0	0	0	1	0	0	4777
tRF-49:70-chrM.Trp-TCA	ENSMUST00000145152.7	Diablo	Coding	Click Me	1	-0.272	151	-31.15	0	1	0	0	0	0	0	2098
tRF-49:70-chrM.Trp-TCA	ENSMUST00000044297.6	Igfbpl1	Coding	Click Me	1	-0.114	145	-30.16	1	0	0	0	0	0	0	1921
tRF-49:70-chrM.Trp-TCA	ENSMUST00000044624.7	Kcnk9	Coding	Click Me	2	-0.371	295	-42.32	0	0	0	1	0	1	0	11030
tRF-49:70-chrM.Trp-TCA	ENSMUST00000178124.2	Tpbgl	Coding	Click Me	1	-0.117	158	-24.79	0	0	0	1	0	0	0	3738
tRF-49:70-chrM.Trp-TCA	ENSMUST00000068892.14	Ash2l	Coding	Click Me	2	-0.475	293	-62.79	0	1	1	0	0	0	0	3500
tRF-49:70-chrM.Trp-TCA	ENSMUST00000169935.1	Akain1	Coding	Click Me	2	-0.564	294	-46.08	0	1	0	0	1	0	0	1886
tRF-49:70-chrM.Trp-TCA	ENSMUST00000110293.8	Serpinb6b	Coding	Click Me	1	-0.143	156	-33.26	0	1	0	0	0	0	0	2903
tRF-49:70-chrM.Trp-TCA	ENSMUST00000048656.13	Ubash3a	Coding	Click Me	1	-0.255	149	-24.98	0	0	0	0	0	1	0	1025
tRF-49:70-chrM.Trp-TCA	ENSMUST00000107682.1	Tmem154	Coding	Click Me	1	-0.183	148	-27.13	0	1	0	0	0	0	0	2636
tRF-49:70-chrM.Trp-TCA	ENSMUST00000108569.3	Vmn1r58	Coding	Click Me	1	-0.16	141	-21.69	0	1	0	0	0	0	0	1410
tRF-49:70-chrM.Trp-TCA	ENSMUST00000063444.2	Rasgef1c	Coding	Click Me	1	-0.372	142	-26.45	0	0	1	0	0	0	0	1475
tRF-49:70-chrM.Trp-TCA	ENSMUST00000116349.8	Xylt2	Coding	Click Me	1	-0.29	140	-32.47	0	0	1	0	0	0	0	740
tRF-49:70-chrM.Trp-TCA	ENSMUST00000209532.1	Cyld	Coding	Click Me	2	-0.56	295	-46.54	0	0	0	1	1	0	0	4932
tRF-49:70-chrM.Trp-TCA	ENSMUST00000046945.12	Palm	Coding	Click Me	1	-0.115	146	-20.89	0	0	0	0	0	1	0	1335
tRF-49:70-chrM.Trp-TCA	ENSMUST00000095044.9	St6galnac6	Coding	Click Me	2	-0.386	300	-49.39	1	0	0	1	0	0	0	1280
tRF-49:70-chrM.Trp-TCA	ENSMUST00000176287.1	Mettl7a2	Coding	Click Me	1	-0.179	152	-28.33	0	1	0	0	0	0	0	1075
tRF-49:70-chrM.Trp-TCA	ENSMUST00000026448.9	Faap100	Coding	Click Me	1	-0.146	164	-33.26	0	0	0	1	0	0	0	1028
tRF-49:70-chrM.Trp-TCA	ENSMUST00000021822.6	Ogn	Coding	Click Me	1	-0.127	166	-26.63	0	0	0	0	1	0	0	3964
tRF-49:70-chrM.Trp-TCA	ENSMUST00000046897.12	Trim14	Coding	Click Me	1	-0.256	156	-22.53	0	0	0	0	0	1	0	1889
tRF-49:70-chrM.Trp-TCA	ENSMUST00000201612.1	Rxfp2	Coding	Click Me	1	-0.485	164	-29.89	0	0	0	0	1	0	0	124
tRF-49:70-chrM.Trp-TCA	ENSMUST00000075858.3	Ugt2b37	Coding	Click Me	1	-0.157	142	-22.88	0	1	0	0	0	0	0	3806
tRF-49:70-chrM.Trp-TCA	ENSMUST00000108567.8	Zfp444	Coding	Click Me	1	-0.133	148	-21.09	0	1	0	0	0	0	0	3831
tRF-49:70-chrM.Trp-TCA	ENSMUST00000026494.13	Rnf165	Coding	Click Me	1	-0.234	153	-28.2	0	0	0	0	1	0	0	6222
tRF-49:70-chrM.Trp-TCA	ENSMUST00000057893.6	Fzd2	Coding	Click Me	1	-0.237	156	-24.71	0	0	0	1	0	0	0	1973
tRF-49:70-chrM.Trp-TCA	ENSMUST00000032069.7	Add2	Coding	Click Me	1	-0.235	152	-28.38	0	0	0	1	0	0	0	7935
tRF-49:70-chrM.Trp-TCA	ENSMUST00000204168.1	Gimap1	Coding	Click Me	1	-0.403	155	-27.75	0	0	0	0	1	0	0	436
tRF-49:70-chrM.Trp-TCA	ENSMUST00000085894.11	Cfap45	Coding	Click Me	1	-0.24	147	-22.2	0	0	0	1	0	0	0	390
tRF-49:70-chrM.Trp-TCA	ENSMUST00000043716.8	Cinp	Coding	Click Me	1	-0.228	162	-25.65	0	0	0	1	0	0	0	4361
tRF-49:70-chrM.Trp-TCA	ENSMUST00000058230.12	Ensa	Coding	Click Me	1	-0.224	149	-21.11	0	0	0	1	0	0	0	11163
tRF-49:70-chrM.Trp-TCA	ENSMUST00000216331.1	Olfr510	Coding	Click Me	2	-0.673	305	-51.78	0	0	1	0	1	0	0	1897
tRF-49:70-chrM.Trp-TCA	ENSMUST00000113440.1	Ccdc88b	Coding	Click Me	1	-0.143	150	-25.54	0	0	0	1	0	0	0	441
tRF-49:70-chrM.Trp-TCA	ENSMUST00000113302.9	Tomm6	Coding	Click Me	2	-0.536	292	-43.33	0	0	0	0	2	0	0	3451
tRF-49:70-chrM.Trp-TCA	ENSMUST00000099475.11	Serf2	Coding	Click Me	1	-0.123	152	-20.5	0	0	0	1	0	0	0	2448
tRF-49:70-chrM.Trp-TCA	ENSMUST00000049052.3	9130019O22Rik	Coding	Click Me	1	-0.136	161	-30.29	0	0	0	0	1	0	0	5380
tRF-49:70-chrM.Trp-TCA	ENSMUST00000021076.5	Rab37	Coding	Click Me	1	-0.155	165	-27.26	0	0	0	1	0	0	0	1496
tRF-49:70-chrM.Trp-TCA	ENSMUST00000049298.14	Tph1	Coding	Click Me	2	-0.39	323	-52.6	0	0	0	0	1	1	0	2785
tRF-49:70-chrM.Trp-TCA	ENSMUST00000057311.3	Sfn	Coding	Click Me	1	-0.192	162	-27.81	0	0	0	1	0	0	0	4981
tRF-49:70-chrM.Trp-TCA	ENSMUST00000185852.6	Msh3	Coding	Click Me	1	-0.264	142	-16.2	0	1	0	0	0	0	0	565
tRF-49:70-chrM.Trp-TCA	ENSMUST00000113759.8	Odf2	Coding	Click Me	1	-0.402	147	-27.32	0	0	1	0	0	0	0	1084
tRF-49:70-chrM.Trp-TCA	ENSMUST00000026911.5	Ccr1	Coding	Click Me	1	-0.203	147	-20.61	0	0	0	0	0	1	0	4217
tRF-49:70-chrM.Trp-TCA	ENSMUST00000100764.9	B4galt7	Coding	Click Me	1	-0.208	153	-26.33	0	0	0	1	0	0	0	1545
tRF-49:70-chrM.Trp-TCA	ENSMUST00000030768.8	Kcnab2	Coding	Click Me	1	-0.184	140	-24.32	0	1	0	0	0	0	0	2290
tRF-49:70-chrM.Trp-TCA	ENSMUST00000130643.8	Srpk1	Coding	Click Me	1	-0.202	144	-21.02	0	1	0	0	0	0	0	3860
tRF-49:70-chrM.Trp-TCA	ENSMUST00000090938.10	Dap3	Coding	Click Me	2	-0.506	310	-44.94	0	0	0	2	0	0	0	4380
tRF-49:70-chrM.Trp-TCA	ENSMUST00000040972.3	Utp15	Coding	Click Me	1	-0.172	157	-22.11	0	0	0	0	1	0	0	2895
tRF-49:70-chrM.Trp-TCA	ENSMUST00000108571.8	Ccdc106	Coding	Click Me	1	-0.136	146	-32.84	0	1	0	0	0	0	0	259
tRF-49:70-chrM.Trp-TCA	ENSMUST00000038757.7	Csdc2	Coding	Click Me	1	-0.147	151	-24.87	0	1	0	0	0	0	0	1673
tRF-49:70-chrM.Trp-TCA	ENSMUST00000214472.1	Olfr1423	Coding	Click Me	1	-0.167	160	-27.34	0	0	0	1	0	0	0	4021
tRF-49:70-chrM.Trp-TCA	ENSMUST00000084501.3	Pappa	Coding	Click Me	2	-0.52	309	-50.36	0	0	0	0	1	1	0	5784
tRF-49:70-chrM.Trp-TCA	ENSMUST00000143043.7	Wt1	Coding	Click Me	1	-0.173	152	-24.34	0	0	0	1	0	0	0	1268
tRF-49:70-chrM.Trp-TCA	ENSMUST00000047970.13	Abcc10	Coding	Click Me	1	-0.15	142	-31.59	0	1	0	0	0	0	0	257
tRF-49:70-chrM.Trp-TCA	ENSMUST00000111523.2	Olfr1254	Coding	Click Me	1	-0.487	148	-25.45	0	0	0	0	1	0	0	1081
tRF-49:70-chrM.Trp-TCA	ENSMUST00000075884.6	Msln	Coding	Click Me	1	-0.248	157	-31.71	0	0	0	1	0	0	0	404
tRF-49:70-chrM.Trp-TCA	ENSMUST00000027373.11	Ppm1f	Coding	Click Me	2	-0.391	289	-39.31	0	1	0	0	1	0	0	4380
tRF-49:70-chrM.Trp-TCA	ENSMUST00000031588.11	Usp30	Coding	Click Me	1	-0.181	146	-25.54	0	1	0	0	0	0	0	1722
tRF-49:70-chrM.Trp-TCA	ENSMUST00000064635.11	Eef2kmt	Coding	Click Me	1	-0.213	144	-21.02	0	1	0	0	0	0	0	1152
tRF-49:70-chrM.Trp-TCA	ENSMUST00000044462.3	Tcam1	Coding	Click Me	1	-0.202	144	-21.02	0	1	0	0	0	0	0	1716
tRF-49:70-chrM.Trp-TCA	ENSMUST00000041730.10	Lmx1b	Coding	Click Me	3	-0.395	476	-89.82	0	0	0	2	1	0	0	3673
tRF-49:70-chrM.Trp-TCA	ENSMUST00000040271.11	Cep85	Coding	Click Me	1	-0.171	145	-29.11	0	1	0	0	0	0	0	1421
tRF-49:70-chrM.Trp-TCA	ENSMUST00000021772.3	Mrs2	Coding	Click Me	1	-0.106	140	-25.54	0	1	0	0	0	0	0	2620
tRF-49:70-chrM.Trp-TCA	ENSMUST00000036049.5	Hsdl1	Coding	Click Me	1	-0.304	144	-25.24	0	0	1	0	0	0	0	4347
tRF-49:70-chrM.Trp-TCA	ENSMUST00000200932.3	Gm3286	Coding	Click Me	1	-0.261	156	-28.53	0	0	0	1	0	0	0	434
tRF-49:70-chrM.Trp-TCA	ENSMUST00000073104.10	Ppp4r1	Coding	Click Me	1	-0.203	163	-29.84	0	0	0	0	0	1	0	5355
tRF-49:70-chrM.Trp-TCA	ENSMUST00000075406.11	Szt2	Coding	Click Me	1	-0.336	144	-25.63	0	0	1	0	0	0	0	588
tRF-49:70-chrM.Trp-TCA	ENSMUST00000023710.5	Krt71	Coding	Click Me	2	-0.728	303	-50.78	0	0	0	1	1	0	0	548
tRF-49:70-chrM.Trp-TCA	ENSMUST00000051016.4	Orai1	Coding	Click Me	1	-0.1	144	-22.34	0	1	0	0	0	0	0	4392
tRF-49:70-chrM.Trp-TCA	ENSMUST00000067399.13	B3gntl1	Coding	Click Me	3	-0.525	468	-79.51	1	0	0	1	0	1	0	1868
tRF-49:70-chrM.Trp-TCA	ENSMUST00000057653.7	Car5a	Coding	Click Me	1	-0.23	144	-21.02	0	1	0	0	0	0	0	971
tRF-49:70-chrM.Trp-TCA	ENSMUST00000169307.2	Olfr976	Coding	Click Me	1	-0.105	141	-28.07	0	1	0	0	0	0	0	1732
tRF-49:70-chrM.Trp-TCA	ENSMUST00000164207.9	Fgfr3	Coding	Click Me	1	-0.159	148	-20.93	0	1	0	0	0	0	0	1503
tRF-49:70-chrM.Trp-TCA	ENSMUST00000022218.5	Dhfr	Coding	Click Me	1	-0.1	155	-24.86	0	0	0	0	0	1	0	5068
tRF-49:70-chrM.Trp-TCA	ENSMUST00000084894.14	Gm45837	Coding	Click Me	1	-0.217	153	-23.33	0	0	0	1	0	0	0	1156
tRF-49:70-chrM.Trp-TCA	ENSMUST00000027498.13	Stk25	Coding	Click Me	1	-0.41	153	-24.01	0	0	0	0	1	0	0	2740
tRF-49:70-chrM.Trp-TCA	ENSMUST00000102861.7	Tex48	Coding	Click Me	1	-0.353	142	-26.73	0	0	1	0	0	0	0	223
tRF-49:70-chrM.Trp-TCA	ENSMUST00000112528.7	Zfp605	Coding	Click Me	1	-0.185	144	-21.02	0	1	0	0	0	0	0	2438
tRF-49:70-chrM.Trp-TCA	ENSMUST00000152420.7	Osgin1	Coding	Click Me	1	-0.196	155	-24.46	0	0	0	1	0	0	0	351
tRF-49:70-chrM.Trp-TCA	ENSMUST00000004614.14	Zfp110	Coding	Click Me	1	-0.199	143	-22.4	1	0	0	0	0	0	0	659
tRF-49:70-chrM.Trp-TCA	ENSMUST00000036045.5	Leap2	Coding	Click Me	2	-0.5	297	-44.11	0	1	0	0	1	0	0	1805
tRF-49:70-chrM.Trp-TCA	ENSMUST00000098367.4	Mlycd	Coding	Click Me	1	-0.295	165	-29.9	0	0	0	0	1	0	0	1232
tRF-49:70-chrM.Trp-TCA	ENSMUST00000053361.11	Gprc5c	Coding	Click Me	2	-0.321	290	-44.95	0	1	0	1	0	0	0	2301
tRF-49:70-chrM.Trp-TCA	ENSMUST00000040821.4	Heyl	Coding	Click Me	1	-0.165	146	-25.91	0	0	0	1	0	0	0	3258
tRF-49:70-chrM.Trp-TCA	ENSMUST00000068452.9	Cnot1	Coding	Click Me	1	-0.261	159	-25.72	0	0	0	1	0	0	0	949
tRF-49:70-chrM.Trp-TCA	ENSMUST00000039928.6	Plekhh1	Coding	Click Me	1	-0.271	154	-23.65	0	0	0	1	0	0	0	2062
tRF-49:70-chrM.Trp-TCA	ENSMUST00000073792.10	Mon2	Coding	Click Me	1	-0.24	151	-22.82	0	0	0	1	0	0	0	3611
tRF-49:70-chrM.Trp-TCA	ENSMUST00000036181.14	Car14	Coding	Click Me	1	-0.419	159	-26.57	0	0	0	0	1	0	0	378
tRF-49:70-chrM.Trp-TCA	ENSMUST00000110967.3	Smok3c	Coding	Click Me	1	-0.161	147	-27.46	0	1	0	0	0	0	0	355
tRF-49:70-chrM.Trp-TCA	ENSMUST00000169282.7	Aph1c	Coding	Click Me	1	-0.189	154	-26.44	0	0	0	0	1	0	0	4304
tRF-49:70-chrM.Trp-TCA	ENSMUST00000028220.9	Fbxw2	Coding	Click Me	2	-0.287	288	-47.61	0	2	0	0	0	0	0	4764
tRF-49:70-chrM.Trp-TCA	ENSMUST00000035785.8	Ssr2	Coding	Click Me	1	-0.103	146	-25.96	0	1	0	0	0	0	0	2118
tRF-49:70-chrM.Trp-TCA	ENSMUST00000071325.8	Nf1	Coding	Click Me	1	-0.225	150	-22.61	0	0	0	1	0	0	0	3236
tRF-49:70-chrM.Trp-TCA	ENSMUST00000216476.1	Olfr129	Coding	Click Me	1	-0.148	150	-23.82	0	0	0	1	0	0	0	3742
tRF-49:70-chrM.Trp-TCA	ENSMUST00000112588.8	Kdm5c	Coding	Click Me	1	-0.23	147	-21.44	0	0	0	1	0	0	0	6025
tRF-49:70-chrM.Trp-TCA	ENSMUST00000043382.8	4930544G11Rik	Coding	Click Me	1	-0.154	141	-28.03	0	1	0	0	0	0	0	650
tRF-49:70-chrM.Trp-TCA	ENSMUST00000028157.8	Gtf3c5	Coding	Click Me	1	-0.197	145	-21.89	0	0	0	0	0	1	0	892
tRF-49:70-chrM.Trp-TCA	ENSMUST00000106286.2	C1qtnf1	Coding	Click Me	1	-0.177	166	-26.86	0	0	0	1	0	0	0	1612
tRF-49:70-chrM.Trp-TCA	ENSMUST00000078494.5	Rag1	Coding	Click Me	1	-0.322	159	-25.93	0	0	0	0	1	0	0	3421
tRF-49:70-chrM.Trp-TCA	ENSMUST00000042594.12	Mlc1	Coding	Click Me	1	-0.115	141	-23.23	0	1	0	0	0	0	0	1138
tRF-49:70-chrM.Trp-TCA	ENSMUST00000060311.11	Hip1	Coding	Click Me	1	-0.183	158	-33.2	0	0	0	0	0	1	0	4738
tRF-49:70-chrM.Trp-TCA	ENSMUST00000080932.7	Fes	Coding	Click Me	1	-0.213	153	-21.66	0	0	0	0	0	1	0	174
tRF-49:70-chrM.Trp-TCA	ENSMUST00000207889.1	Mical3	Coding	Click Me	1	-0.126	160	-30.98	0	0	0	0	1	0	0	2946
tRF-49:70-chrM.Trp-TCA	ENSMUST00000166581.3	Fga	Coding	Click Me	1	-0.105	145	-28.37	0	1	0	0	0	0	0	2662
tRF-49:70-chrM.Trp-TCA	ENSMUST00000102869.7	Xpo1	Coding	Click Me	1	-0.281	148	-22.65	0	0	1	0	0	0	0	2155
tRF-49:70-chrM.Trp-TCA	ENSMUST00000114297.4	Vopp1	Coding	Click Me	1	-0.105	141	-29.4	1	0	0	0	0	0	0	2227
tRF-49:70-chrM.Trp-TCA	ENSMUST00000085886.2	Smok3a	Coding	Click Me	1	-0.161	147	-27.46	0	1	0	0	0	0	0	770
tRF-49:70-chrM.Trp-TCA	ENSMUST00000045289.5	Pnpla3	Coding	Click Me	1	-0.223	153	-21.81	0	0	0	0	1	0	0	3436
tRF-49:70-chrM.Trp-TCA	ENSMUST00000048308.5	C130074G19Rik	Coding	Click Me	1	-0.157	140	-23.9	0	1	0	0	0	0	0	4787
tRF-49:70-chrM.Trp-TCA	ENSMUST00000022057.8	Tppp	Coding	Click Me	1	-0.22	142	-19.96	0	0	0	1	0	0	0	4763
tRF-49:70-chrM.Trp-TCA	ENSMUST00000214139.1	Olfr172	Coding	Click Me	1	-0.185	141	-23.52	0	1	0	0	0	0	0	701
tRF-49:70-chrM.Trp-TCA	ENSMUST00000030180.6	Sit1	Coding	Click Me	1	-0.154	155	-26.53	0	0	0	1	0	0	0	5256
tRF-49:70-chrM.Trp-TCA	ENSMUST00000190457.1	2210011C24Rik	Coding	Click Me	1	-0.245	165	-24.97	0	0	0	0	0	1	0	267
tRF-49:70-chrM.Trp-TCA	ENSMUST00000039796.13	Gucd1	Coding	Click Me	1	-0.173	148	-21.52	0	0	0	0	1	0	0	2595
tRF-49:70-chrM.Trp-TCA	ENSMUST00000089129.6	Cyp2d9	Coding	Click Me	1	-0.117	143	-23.1	0	0	1	0	0	0	0	2889
tRF-49:70-chrM.Trp-TCA	ENSMUST00000072311.12	Yes1	Coding	Click Me	1	-0.145	143	-24.79	1	0	0	0	0	0	0	3232
tRF-49:70-chrM.Trp-TCA	ENSMUST00000028608.12	Nat10	Coding	Click Me	2	-0.515	295	-49.01	0	0	0	1	1	0	0	1994
tRF-49:70-chrM.Trp-TCA	ENSMUST00000033739.4	Car5b	Coding	Click Me	2	-0.284	314	-52.22	0	1	0	1	0	0	0	3413
tRF-49:70-chrM.Trp-TCA	ENSMUST00000040772.8	Fermt3	Coding	Click Me	1	-0.122	144	-23.93	0	1	0	0	0	0	0	393
tRF-49:70-chrM.Trp-TCA	ENSMUST00000046963.9	Map2k4	Coding	Click Me	1	-0.237	164	-26.52	0	0	0	0	1	0	0	2451
tRF-49:70-chrM.Trp-TCA	ENSMUST00000208039.1	Gm4756	Coding	Click Me	1	-0.148	145	-28.15	0	1	0	0	0	0	0	1309
tRF-49:70-chrM.Trp-TCA	ENSMUST00000129423.7	Ttyh1	Coding	Click Me	3	-0.395	478	-78.26	0	0	0	2	0	1	0	2875
tRF-49:70-chrM.Trp-TCA	ENSMUST00000075657.7	Ap3s2	Coding	Click Me	1	-0.208	149	-22.38	0	0	0	1	0	0	0	5163
tRF-49:70-chrM.Trp-TCA	ENSMUST00000114180.10	Taz	Coding	Click Me	1	-0.156	145	-25.83	1	0	0	0	0	0	0	748
tRF-49:70-chrM.Trp-TCA	ENSMUST00000007444.13	Strada	Coding	Click Me	1	-0.401	156	-25.03	0	0	0	0	1	0	0	1127
tRF-49:70-chrM.Trp-TCA	ENSMUST00000038211.12	Slfn9	Coding	Click Me	1	-0.123	145	-24.24	1	0	0	0	0	0	0	2468
tRF-49:70-chrM.Trp-TCA	ENSMUST00000124992.7	Ube2j1	Coding	Click Me	1	-0.445	145	-24.55	0	0	0	0	1	0	0	2404
tRF-49:70-chrM.Trp-TCA	ENSMUST00000226689.1	Vmn1r6	Coding	Click Me	1	-0.184	149	-21.59	0	0	0	0	0	1	0	6559
tRF-49:70-chrM.Trp-TCA	ENSMUST00000030742.10	Mecr	Coding	Click Me	1	-0.287	163	-27.76	0	0	0	0	0	1	0	942
tRF-49:70-chrM.Trp-TCA	ENSMUST00000163402.7	Synj2bp	Coding	Click Me	1	-0.138	142	-20.67	0	0	1	0	0	0	0	9832
tRF-49:70-chrM.Trp-TCA	ENSMUST00000033127.11	Sergef	Coding	Click Me	1	-0.15	147	-20.29	0	0	0	1	0	0	0	2645
tRF-49:70-chrM.Trp-TCA	ENSMUST00000021558.7	Galnt16	Coding	Click Me	1	-0.288	156	-21.02	0	0	0	0	0	1	0	9945
tRF-49:70-chrM.Trp-TCA	ENSMUST00000041297.14	Zbed4	Coding	Click Me	1	-0.275	158	-26.92	0	0	0	1	0	0	0	1279
tRF-49:70-chrM.Trp-TCA	ENSMUST00000036156.5	Ipo13	Coding	Click Me	1	-0.203	144	-20.84	0	1	0	0	0	0	0	1938
tRF-49:70-chrM.Trp-TCA	ENSMUST00000058280.12	Prodh2	Coding	Click Me	2	-0.269	297	-39.45	0	1	0	1	0	0	0	1980
tRF-49:70-chrM.Trp-TCA	ENSMUST00000161053.7	Cldn16	Coding	Click Me	1	-0.382	153	-18.89	0	0	0	0	1	0	0	4520
tRF-49:70-chrM.Trp-TCA	ENSMUST00000106928.9	Slc22a15	Coding	Click Me	4	-0.74	596	-99.28	0	1	1	1	1	0	0	4663
tRF-49:70-chrM.Trp-TCA	ENSMUST00000057814.4	Oas1f	Coding	Click Me	1	-0.151	141	-25.7	1	0	0	0	0	0	0	360
tRF-49:70-chrM.Trp-TCA	ENSMUST00000102745.9	Tnfaip2	Coding	Click Me	1	-0.124	144	-21.79	0	1	0	0	0	0	0	1456
tRF-49:70-chrM.Trp-TCA	ENSMUST00000213940.1	Olfr373	Coding	Click Me	2	-0.242	300	-42.77	0	1	0	0	0	1	0	2378
tRF-49:70-chrM.Trp-TCA	ENSMUST00000186469.6	Rhof	Coding	Click Me	1	-0.415	145	-22.7	0	0	1	0	0	0	0	3581
tRF-49:70-chrM.Trp-TCA	ENSMUST00000095500.4	Ccdc78	Coding	Click Me	1	-0.24	144	-19.09	0	1	0	0	0	0	0	301
tRF-49:70-chrM.Trp-TCA	ENSMUST00000105611.7	Oprm1	Coding	Click Me	1	-0.441	164	-28.23	0	0	0	0	1	0	0	1670
tRF-49:70-chrM.Trp-TCA	ENSMUST00000035565.4	Pkd1	Coding	Click Me	1	-0.164	146	-26.55	0	1	0	0	0	0	0	975
tRF-49:70-chrM.Trp-TCA	ENSMUST00000001559.10	Itfg2	Coding	Click Me	1	-0.172	140	-20.66	0	0	0	1	0	0	0	1265
tRF-49:70-chrM.Trp-TCA	ENSMUST00000110324.7	Fbln7	Coding	Click Me	1	-0.217	152	-27.14	0	0	0	0	0	1	0	1461
tRF-49:70-chrM.Trp-TCA	ENSMUST00000040131.12	Elf1	Coding	Click Me	1	-0.127	144	-21.02	0	1	0	0	0	0	0	2135
tRF-49:70-chrM.Trp-TCA	ENSMUST00000165219.7	Clp1	Coding	Click Me	1	-0.139	146	-26.3	1	0	0	0	0	0	0	1184
tRF-49:70-chrM.Trp-TCA	ENSMUST00000027623.8	Tsn	Coding	Click Me	1	-0.155	143	-22.7	0	1	0	0	0	0	0	6979
tRF-49:70-chrM.Trp-TCA	ENSMUST00000015511.14	Plxnd1	Coding	Click Me	1	-0.341	140	-26.96	0	0	1	0	0	0	0	939
tRF-49:70-chrM.Trp-TCA	ENSMUST00000160197.5	Exoc6b	Coding	Click Me	1	-0.278	151	-16.94	0	0	0	1	0	0	0	6910
tRF-49:70-chrM.Trp-TCA	ENSMUST00000022908.9	Slc25a32	Coding	Click Me	1	-0.23	144	-21.02	0	1	0	0	0	0	0	4740
tRF-49:70-chrM.Trp-TCA	ENSMUST00000033450.2	Gpc4	Coding	Click Me	1	-0.241	162	-25.4	0	0	0	0	0	1	0	5043
tRF-49:70-chrM.Trp-TCA	ENSMUST00000075181.10	Plekha1	Coding	Click Me	1	-0.256	141	-22.07	0	1	0	0	0	0	0	2457
tRF-49:70-chrM.Trp-TCA	ENSMUST00000118364.1	Il23r	Coding	Click Me	1	-0.235	157	-22.39	0	0	0	1	0	0	0	5199
tRF-49:70-chrM.Trp-TCA	ENSMUST00000109643.7	Sec61g	Coding	Click Me	1	-0.443	157	-22.85	0	0	0	0	1	0	0	4347
tRF-49:70-chrM.Trp-TCA	ENSMUST00000064099.7	Ppp6r1	Coding	Click Me	1	-0.158	145	-22.94	0	1	0	0	0	0	0	1399
tRF-49:70-chrM.Trp-TCA	ENSMUST00000004326.3	Plxna3	Coding	Click Me	1	-0.122	144	-28	0	1	0	0	0	0	0	1152
tRF-49:70-chrM.Trp-TCA	ENSMUST00000038539.7	1700123O20Rik	Coding	Click Me	1	-0.207	147	-22.53	0	1	0	0	0	0	0	711
tRF-49:70-chrM.Trp-TCA	ENSMUST00000057631.11	Sgsm2	Coding	Click Me	1	-0.18	148	-21.48	0	0	0	1	0	0	0	1557
tRF-49:70-chrM.Trp-TCA	ENSMUST00000107545.8	Med1	Coding	Click Me	1	-0.223	146	-27.22	0	0	0	0	1	0	0	3083
tRF-49:70-chrM.Trp-TCA	ENSMUST00000229866.1	Socs1	Coding	Click Me	2	-0.485	307	-57.68	0	0	1	1	0	0	0	1993
tRF-49:70-chrM.Trp-TCA	ENSMUST00000027753.12	Lamc2	Coding	Click Me	1	-0.2	143	-23.67	0	1	0	0	0	0	0	1274
tRF-49:70-chrM.Trp-TCA	ENSMUST00000097632.4	Gal3st2c	Coding	Click Me	1	-0.165	143	-25.61	0	0	1	0	0	0	0	7622
tRF-49:70-chrM.Trp-TCA	ENSMUST00000100489.3	Rac1	Coding	Click Me	1	-0.126	141	-23.72	0	1	0	0	0	0	0	1493
tRF-49:70-chrM.Trp-TCA	ENSMUST00000159973.2	Speer4e	Coding	Click Me	1	-0.182	149	-19.1	0	1	0	0	0	0	0	812
tRF-49:70-chrM.Trp-TCA	ENSMUST00000032376.5	Lmcd1	Coding	Click Me	1	-0.352	143	-29.32	0	0	1	0	0	0	0	459
tRF-49:70-chrM.Trp-TCA	ENSMUST00000038027.5	Gpi1	Coding	Click Me	1	-0.17	140	-19.43	0	1	0	0	0	0	0	1093
tRF-49:70-chrM.Trp-TCA	ENSMUST00000047379.14	Ptger4	Coding	Click Me	1	-0.225	153	-26.33	0	0	0	1	0	0	0	1234
tRF-49:70-chrM.Trp-TCA	ENSMUST00000171545.8	Enpp2	Coding	Click Me	1	-0.168	143	-18.91	0	0	0	1	0	0	0	1391
tRF-49:70-chrM.Trp-TCA	ENSMUST00000042194.9	Trpm4	Coding	Click Me	1	-0.124	160	-26.82	0	0	0	1	0	0	0	3995
tRF-49:70-chrM.Trp-TCA	ENSMUST00000213610.1	Fignl2	Coding	Click Me	1	-0.173	149	-22.72	0	0	0	1	0	0	0	2271
tRF-49:70-chrM.Trp-TCA	ENSMUST00000143791.7	Bicc1	Coding	Click Me	1	-0.188	152	-19.68	0	0	0	1	0	0	0	2455
tRF-49:70-chrM.Trp-TCA	ENSMUST00000086465.5	Adora1	Coding	Click Me	2	-0.508	297	-54.28	0	1	0	0	1	0	0	3736
tRF-49:70-chrM.Trp-TCA	ENSMUST00000109272.8	Mier3	Coding	Click Me	1	-0.186	142	-16.99	0	0	0	1	0	0	0	3494
tRF-49:70-chrM.Trp-TCA	ENSMUST00000112586.7	Apobec1	Coding	Click Me	1	-0.163	160	-26.79	0	0	0	1	0	0	0	1015
tRF-49:70-chrM.Trp-TCA	ENSMUST00000169121.7	Syt7	Coding	Click Me	1	-0.114	146	-17	0	0	0	1	0	0	0	4737
tRF-49:70-chrM.Trp-TCA	ENSMUST00000225259.1	Slc34a1	Coding	Click Me	1	-0.181	150	-29.69	0	0	0	1	0	0	0	1955
tRF-49:70-chrM.Trp-TCA	ENSMUST00000052927.10	Ppp1r16b	Coding	Click Me	1	-0.152	148	-25.3	0	1	0	0	0	0	0	4471
tRF-49:70-chrM.Trp-TCA	ENSMUST00000037313.5	Gdf7	Coding	Click Me	1	-0.116	165	-31.09	0	0	0	0	1	0	0	6907
tRF-49:70-chrM.Trp-TCA	ENSMUST00000042661.7	Ttyh3	Coding	Click Me	1	-0.204	162	-28.89	0	0	0	0	0	1	0	2880
tRF-49:70-chrM.Trp-TCA	ENSMUST00000168579.7	Slc16a3	Coding	Click Me	1	-0.399	151	-25.42	0	0	0	0	1	0	0	5299
tRF-49:70-chrM.Trp-TCA	ENSMUST00000006856.2	Pola1	Coding	Click Me	1	-0.222	141	-18.81	0	0	0	0	0	1	0	909
tRF-49:70-chrM.Trp-TCA	ENSMUST00000017836.7	Rhbdl3	Coding	Click Me	2	-0.286	288	-43.97	0	2	0	0	0	0	0	5265
tRF-49:70-chrM.Trp-TCA	ENSMUST00000025659.10	Zfand5	Coding	Click Me	2	-0.27	308	-48.82	0	0	0	0	2	0	0	19330
tRF-49:70-chrM.Trp-TCA	ENSMUST00000034949.9	Csnk1g1	Coding	Click Me	2	-0.26	293	-49.82	0	1	1	0	0	0	0	5383
tRF-49:70-chrM.Trp-TCA	ENSMUST00000044503.13	Rftn1	Coding	Click Me	1	-0.206	162	-25.98	0	0	0	0	0	1	0	1954
tRF-49:70-chrM.Trp-TCA	ENSMUST00000038537.8	Wtip	Coding	Click Me	1	-0.409	143	-26.42	0	0	1	0	0	0	0	941
tRF-49:70-chrM.Trp-TCA	ENSMUST00000129308.8	Flad1	Coding	Click Me	1	-0.197	144	-21.02	0	1	0	0	0	0	0	4600
tRF-49:70-chrM.Trp-TCA	ENSMUST00000109078.7	Cdkl3	Coding	Click Me	1	-0.17	144	-21.02	0	1	0	0	0	0	0	2365
tRF-49:70-chrM.Trp-TCA	ENSMUST00000059844.12	Cnpy3	Coding	Click Me	1	-0.282	142	-17	0	1	0	0	0	0	0	1542
tRF-49:70-chrM.Trp-TCA	ENSMUST00000004968.10	Plod3	Coding	Click Me	1	-0.279	162	-27.69	0	0	0	0	1	0	0	4132
tRF-49:70-chrM.Trp-TCA	ENSMUST00000206400.1	Stambp	Coding	Click Me	1	-0.273	148	-21.3	0	0	0	0	1	0	0	763
tRF-49:70-chrM.Trp-TCA	ENSMUST00000009003.8	Rala	Coding	Click Me	1	-0.242	140	-17.82	0	0	0	0	0	1	0	1804
tRF-49:70-chrM.Trp-TCA	ENSMUST00000050385.5	Klri2	Coding	Click Me	2	-0.459	302	-44.87	0	0	0	2	0	0	0	3100
tRF-49:70-chrM.Trp-TCA	ENSMUST00000130216.2	Srsf3	Coding	Click Me	1	-0.39	148	-26.76	0	0	1	0	0	0	0	5260
tRF-49:70-chrM.Trp-TCA	ENSMUST00000000127.5	Wnt3	Coding	Click Me	1	-0.211	142	-20.61	0	0	0	0	0	1	0	1958
tRF-49:70-chrM.Trp-TCA	ENSMUST00000058688.6	Rnf152	Coding	Click Me	1	-0.257	157	-30.07	0	0	0	0	1	0	0	7305
tRF-49:70-chrM.Trp-TCA	ENSMUST00000023684.13	Gart	Coding	Click Me	1	-0.188	144	-21.02	0	1	0	0	0	0	0	806
tRF-49:70-chrM.Trp-TCA	ENSMUST00000007236.4	Syngr3	Coding	Click Me	2	-0.707	301	-47.81	0	0	0	0	2	0	0	1139
tRF-49:70-chrM.Trp-TCA	ENSMUST00000080036.2	Htt	Coding	Click Me	2	-0.294	296	-43.95	0	0	0	1	0	1	0	3690
tRF-49:70-chrM.Trp-TCA	ENSMUST00000090591.3	Il3ra	Coding	Click Me	1	-0.134	140	-22.24	0	1	0	0	0	0	0	589
tRF-49:70-chrM.Trp-TCA	ENSMUST00000039303.6	Npy1r	Coding	Click Me	1	-0.151	140	-17.35	0	1	0	0	0	0	0	1610
tRF-49:70-chrM.Trp-TCA	ENSMUST00000201047.3	Gm5141	Coding	Click Me	1	-0.249	153	-21.61	0	0	0	0	0	1	0	1408
tRF-49:70-chrM.Trp-TCA	ENSMUST00000080856.13	Ipo11	Coding	Click Me	1	-0.19	144	-18.8	0	0	0	0	0	1	0	1192
tRF-49:70-chrM.Trp-TCA	ENSMUST00000113997.8	Ppp6r3	Coding	Click Me	1	-0.109	144	-21.02	0	1	0	0	0	0	0	4998
tRF-49:70-chrM.Trp-TCA	ENSMUST00000182898.7	Anapc16	Coding	Click Me	1	-0.215	144	-21.02	0	1	0	0	0	0	0	5382
tRF-49:70-chrM.Trp-TCA	ENSMUST00000068322.6	Sec14l3	Coding	Click Me	2	-0.336	302	-47.03	0	0	0	2	0	0	0	2736
tRF-49:70-chrM.Trp-TCA	ENSMUST00000124226.2	Armcx4	Coding	Click Me	1	-0.173	144	-21.02	0	1	0	0	0	0	0	1357
tRF-49:70-chrM.Trp-TCA	ENSMUST00000019859.8	Gle1	Coding	Click Me	1	-0.136	141	-23.8	1	0	0	0	0	0	0	1856
tRF-49:70-chrM.Trp-TCA	ENSMUST00000007961.14	Zmiz1	Coding	Click Me	1	-0.14	143	-20.32	0	0	0	1	0	0	0	1672
tRF-49:70-chrM.Trp-TCA	ENSMUST00000107974.2	Iglon5	Coding	Click Me	1	-0.214	140	-33.68	0	1	0	0	0	0	0	1564
tRF-49:70-chrM.Trp-TCA	ENSMUST00000214760.1	Olfr1277	Coding	Click Me	1	-0.203	155	-25.43	0	0	0	0	1	0	0	4508
tRF-49:70-chrM.Trp-TCA	ENSMUST00000121758.7	Ano1	Coding	Click Me	1	-0.231	166	-28.42	0	0	0	1	0	0	0	1450
tRF-49:70-chrM.Trp-TCA	ENSMUST00000080754.11	Pknox2	Coding	Click Me	1	-0.105	142	-24.56	0	1	0	0	0	0	0	1840
tRF-49:70-chrM.Trp-TCA	ENSMUST00000036872.15	Wipi2	Coding	Click Me	2	-0.267	306	-53.63	0	1	0	1	0	0	0	3616
tRF-49:70-chrM.Trp-TCA	ENSMUST00000062915.8	Gdpgp1	Coding	Click Me	1	-0.141	140	-16.63	0	0	0	0	0	1	0	4026
tRF-49:70-chrM.Trp-TCA	ENSMUST00000024696.8	Mmp25	Coding	Click Me	2	-0.282	296	-47.35	0	1	0	1	0	0	0	2567
tRF-49:70-chrM.Trp-TCA	ENSMUST00000165430.7	Comt	Coding	Click Me	2	-0.358	296	-44.42	0	1	0	1	0	0	0	1554
tRF-49:70-chrM.Trp-TCA	ENSMUST00000034023.3	Scrg1	Coding	Click Me	1	-0.153	144	-19.07	0	1	0	0	0	0	0	2208
tRF-49:70-chrM.Trp-TCA	ENSMUST00000105823.1	Sh2d5	Coding	Click Me	1	-0.141	160	-31.81	0	0	0	0	0	1	0	2075
tRF-49:70-chrM.Trp-TCA	ENSMUST00000034751.5	Gcnt3	Coding	Click Me	1	-0.368	142	-19.03	0	0	0	0	1	0	0	2475
tRF-49:70-chrM.Trp-TCA	ENSMUST00000032891.14	Smg1	Coding	Click Me	1	-0.167	159	-25.49	0	0	0	0	1	0	0	4233
tRF-49:70-chrM.Trp-TCA	ENSMUST00000024817.14	Rnf8	Coding	Click Me	1	-0.162	144	-21.02	0	1	0	0	0	0	0	5239
tRF-49:70-chrM.Trp-TCA	ENSMUST00000160708.7	Stxbp2	Coding	Click Me	1	-0.23	150	-25.41	0	0	0	1	0	0	0	1284
tRF-49:70-chrM.Trp-TCA	ENSMUST00000230616.1	Sec14l5	Coding	Click Me	1	-0.169	145	-25.74	0	0	0	1	0	0	0	3521
tRF-49:70-chrM.Trp-TCA	ENSMUST00000213381.1	Olfr432	Coding	Click Me	1	-0.389	152	-24.45	0	0	0	0	1	0	0	3439
tRF-49:70-chrM.Trp-TCA	ENSMUST00000027896.9	Nphs2	Coding	Click Me	1	-0.183	153	-20.68	0	0	0	0	1	0	0	3342
tRF-49:70-chrM.Trp-TCA	ENSMUST00000018985.14	Rad51d	Coding	Click Me	1	-0.31	146	-21.4	0	0	0	0	1	0	0	5877
tRF-49:70-chrM.Trp-TCA	ENSMUST00000113142.9	Ugt1a10	Coding	Click Me	2	-0.335	295	-57.41	2	0	0	0	0	0	0	1578
tRF-49:70-chrM.Trp-TCA	ENSMUST00000000326.11	Bcl6b	Coding	Click Me	1	-0.254	147	-24.3	0	0	0	1	0	0	0	3030
tRF-49:70-chrM.Trp-TCA	ENSMUST00000001172.11	Ankrd39	Coding	Click Me	1	-0.176	144	-19.84	0	0	0	1	0	0	0	1298
tRF-49:70-chrM.Trp-TCA	ENSMUST00000089959.6	Gch1	Coding	Click Me	1	-0.412	151	-26.37	0	0	0	0	1	0	0	1910
tRF-49:70-chrM.Trp-TCA	ENSMUST00000030508.13	Pax7	Coding	Click Me	1	-0.107	170	-34.2	0	0	0	0	1	0	0	3726
tRF-49:70-chrM.Trp-TCA	ENSMUST00000206705.2	Gm4881	Coding	Click Me	1	-0.233	152	-23.42	0	0	0	1	0	0	0	50
tRF-49:70-chrM.Trp-TCA	ENSMUST00000027368.5	Slc11a1	Coding	Click Me	1	-0.138	140	-17.35	0	1	0	0	0	0	0	5306
tRF-49:70-chrM.Trp-TCA	ENSMUST00000209035.1	Rinl	Coding	Click Me	1	-0.159	142	-29.17	1	0	0	0	0	0	0	1100
tRF-49:70-chrM.Trp-TCA	ENSMUST00000101071.3	Tcl1	Coding	Click Me	1	-0.34	144	-27.01	0	0	1	0	0	0	0	662
tRF-49:70-chrM.Trp-TCA	ENSMUST00000039177.11	Dpyd	Coding	Click Me	1	-0.31	155	-23.01	0	0	0	0	1	0	0	1265
tRF-49:70-chrM.Trp-TCA	ENSMUST00000106190.9	1110065P20Rik	Coding	Click Me	1	-0.342	144	-18.47	0	0	0	0	1	0	0	854
tRF-49:70-chrM.Trp-TCA	ENSMUST00000191428.6	Fat1	Coding	Click Me	1	-0.234	148	-23.84	0	0	0	0	0	1	0	3949
tRF-49:70-chrM.Trp-TCA	ENSMUST00000099557.9	Pak6	Coding	Click Me	1	-0.114	151	-28.51	0	1	0	0	0	0	0	1446
tRF-49:70-chrM.Trp-TCA	ENSMUST00000102578.10	Ankrd13a	Coding	Click Me	2	-0.523	291	-49.9	0	1	0	0	1	0	0	1919
tRF-49:70-chrM.Trp-TCA	ENSMUST00000057026.9	Slc25a47	Coding	Click Me	1	-0.197	145	-27.02	1	0	0	0	0	0	0	596
tRF-49:70-chrM.Trp-TCA	ENSMUST00000052605.7	Ceacam19	Coding	Click Me	1	-0.203	143	-16.2	0	0	0	1	0	0	0	2385
tRF-49:70-chrM.Trp-TCA	ENSMUST00000057844.9	B230219D22Rik	Coding	Click Me	1	-0.131	144	-21.02	0	1	0	0	0	0	0	3872
tRF-49:70-chrM.Trp-TCA	ENSMUST00000001326.6	Sp1	Coding	Click Me	1	-0.237	160	-26.66	0	0	0	1	0	0	0	5385
tRF-49:70-chrM.Trp-TCA	ENSMUST00000022100.6	Slc6a3	Coding	Click Me	1	-0.217	152	-24.22	0	0	0	0	0	1	0	1439
tRF-49:70-chrM.Trp-TCA	ENSMUST00000015892.13	Prpf3	Coding	Click Me	1	-0.277	150	-26.08	0	0	0	1	0	0	0	695
tRF-49:70-chrM.Trp-TCA	ENSMUST00000164273.8	Panx1	Coding	Click Me	1	-0.323	164	-27	0	0	0	0	1	0	0	4009
tRF-49:70-chrM.Trp-TCA	ENSMUST00000150412.3	Pakap	Coding	Click Me	1	-0.25	151	-21.38	0	0	0	1	0	0	0	4028
tRF-49:70-chrM.Trp-TCA	ENSMUST00000031697.8	Cul1	Coding	Click Me	1	-0.198	141	-28.25	0	0	1	0	0	0	0	4774
tRF-49:70-chrM.Trp-TCA	ENSMUST00000064230.15	Rft1	Coding	Click Me	1	-0.234	144	-21.02	0	1	0	0	0	0	0	708
tRF-49:70-chrM.Trp-TCA	ENSMUST00000105810.7	Ubxn10	Coding	Click Me	1	-0.103	155	-33.91	0	1	0	0	0	0	0	1992
tRF-49:70-chrM.Trp-TCA	ENSMUST00000211617.1	Cks1brt	Coding	Click Me	1	-0.175	146	-21.04	0	1	0	0	0	0	0	1812
tRF-49:70-chrM.Trp-TCA	ENSMUST00000027493.3	Pask	Coding	Click Me	1	-0.273	159	-27.64	0	1	0	0	0	0	0	1385
tRF-49:70-chrM.Trp-TCA	ENSMUST00000100866.2	Ccdc92b	Coding	Click Me	1	-0.143	150	-26.67	0	1	0	0	0	0	0	2945
tRF-49:70-chrM.Trp-TCA	ENSMUST00000192069.5	Tnr	Coding	Click Me	1	-0.222	151	-22.11	0	0	0	0	1	0	0	7516
tRF-49:70-chrM.Trp-TCA	ENSMUST00000020169.8	Enpp3	Coding	Click Me	1	-0.16	144	-21.02	0	1	0	0	0	0	0	1440
tRF-49:70-chrM.Trp-TCA	ENSMUST00000226225.1	Vmn1r197	Coding	Click Me	2	-0.576	288	-45.91	0	0	1	1	0	0	0	4059
tRF-49:70-chrM.Trp-TCA	ENSMUST00000128402.2	Kif26a	Coding	Click Me	1	-0.206	144	-20.26	0	0	0	1	0	0	0	1115
tRF-49:70-chrM.Trp-TCA	ENSMUST00000045154.5	Themis2	Coding	Click Me	1	-0.414	145	-20.69	0	0	0	0	1	0	0	3399
tRF-49:70-chrM.Trp-TCA	ENSMUST00000093962.4	Ccnd1	Coding	Click Me	1	-0.178	140	-26.4	0	1	0	0	0	0	0	2680
tRF-49:70-chrM.Trp-TCA	ENSMUST00000099577.3	Gm5134	Coding	Click Me	1	-0.399	175	-34.02	0	0	0	0	1	0	0	764
tRF-49:70-chrM.Trp-TCA	ENSMUST00000091459.11	Fam172a	Coding	Click Me	1	-0.124	146	-28.41	0	1	0	0	0	0	0	2580
tRF-49:70-chrM.Trp-TCA	ENSMUST00000127569.7	Usp3	Coding	Click Me	1	-0.178	144	-23.14	0	0	1	0	0	0	0	3777
tRF-49:70-chrM.Trp-TCA	ENSMUST00000034854.7	Chrnb4	Coding	Click Me	2	-0.28	303	-57.59	1	1	0	0	0	0	0	1949
tRF-49:70-chrM.Trp-TCA	ENSMUST00000115560.3	Yeats2	Coding	Click Me	1	-0.178	144	-21.02	0	1	0	0	0	0	0	1700
tRF-49:70-chrM.Trp-TCA	ENSMUST00000076803.11	Atg13	Coding	Click Me	2	-0.295	291	-44.92	0	2	0	0	0	0	0	4131
tRF-49:70-chrM.Trp-TCA	ENSMUST00000108691.1	Dnah9	Coding	Click Me	1	-0.39	140	-23.51	0	0	1	0	0	0	0	731
tRF-49:70-chrM.Trp-TCA	ENSMUST00000121674.8	Poli	Coding	Click Me	1	-0.219	152	-25.85	0	1	0	0	0	0	0	231
tRF-49:70-chrM.Trp-TCA	ENSMUST00000041616.14	Pdxk	Coding	Click Me	1	-0.113	150	-25.5	0	0	0	0	1	0	0	4057
tRF-49:70-chrM.Trp-TCA	ENSMUST00000005057.6	Thop1	Coding	Click Me	1	-0.15	147	-25.06	0	1	0	0	0	0	0	1442
tRF-49:70-chrM.Trp-TCA	ENSMUST00000028209.14	Dolpp1	Coding	Click Me	1	-0.155	147	-24.23	0	1	0	0	0	0	0	1351
tRF-49:70-chrM.Trp-TCA	ENSMUST00000019248.12	Cd22	Coding	Click Me	1	-0.212	140	-21.63	0	1	0	0	0	0	0	1129
tRF-49:70-chrM.Trp-TCA	ENSMUST00000102646.2	Selenoh	Coding	Click Me	1	-0.237	141	-16.98	0	0	0	1	0	0	0	333
tRF-49:70-chrM.Trp-TCA	ENSMUST00000000137.7	Actr2	Coding	Click Me	2	-0.382	300	-45.68	0	1	0	1	0	0	0	3902
tRF-49:70-chrM.Trp-TCA	ENSMUST00000053020.7	Neurl1b	Coding	Click Me	1	-0.149	144	-26.32	1	0	0	0	0	0	0	4985
tRF-49:70-chrM.Trp-TCA	ENSMUST00000032179.13	Nup210	Coding	Click Me	1	-0.144	149	-22.5	0	0	0	0	0	1	0	1332
tRF-49:70-chrM.Trp-TCA	ENSMUST00000128231.1	Dad1	Coding	Click Me	1	-0.109	157	-26.74	0	0	0	0	1	0	0	3077
tRF-49:70-chrM.Trp-TCA	ENSMUST00000000940.14	Nsun5	Coding	Click Me	1	-0.383	145	-20.23	0	0	0	0	1	0	0	814
tRF-49:70-chrM.Trp-TCA	ENSMUST00000034465.8	2810004N23Rik	Coding	Click Me	1	-0.309	165	-29.64	0	0	0	1	0	0	0	2899
tRF-49:70-chrM.Trp-TCA	ENSMUST00000058991.4	Olfr1352	Coding	Click Me	1	-0.12	157	-31.29	0	1	0	0	0	0	0	3182
tRF-49:70-chrM.Trp-TCA	ENSMUST00000084488.4	Dock1	Coding	Click Me	1	-0.233	143	-26.36	0	1	0	0	0	0	0	4855
tRF-49:70-chrM.Trp-TCA	ENSMUST00000027785.14	Sdccag8	Coding	Click Me	1	-0.372	157	-28.7	0	0	0	0	1	0	0	3844
tRF-49:70-chrM.Trp-TCA	ENSMUST00000112377.7	Phka2	Coding	Click Me	1	-0.406	140	-20.02	0	0	1	0	0	0	0	1320
tRF-49:70-chrM.Trp-TCA	ENSMUST00000162183.7	Alg12	Coding	Click Me	1	-0.47	146	-18.15	0	0	0	0	1	0	0	591
tRF-49:70-chrM.Trp-TCA	ENSMUST00000217845.2	Olfr1293-ps	Coding	Click Me	1	-0.135	143	-24.42	0	1	0	0	0	0	0	2545
tRF-49:70-chrM.Trp-TCA	ENSMUST00000034738.13	Rsl24d1	Coding	Click Me	1	-0.306	161	-23.08	0	0	0	0	0	1	0	3818
tRF-49:70-chrM.Trp-TCA	ENSMUST00000226971.1	Vmn1r29	Coding	Click Me	1	-0.185	156	-26.32	0	0	0	1	0	0	0	3477
tRF-49:70-chrM.Trp-TCA	ENSMUST00000091252.4	Sec16a	Coding	Click Me	2	-0.632	318	-51.29	0	0	0	0	2	0	0	1452
tRF-49:70-chrM.Trp-TCA	ENSMUST00000029632.6	Lrat	Coding	Click Me	1	-0.332	164	-27.4	0	0	0	0	1	0	0	5369
tRF-49:70-chrM.Trp-TCA	ENSMUST00000107444.7	Alad	Coding	Click Me	2	-0.212	286	-50.52	0	1	1	0	0	0	0	4729
tRF-49:70-chrM.Trp-TCA	ENSMUST00000025204.5	Pfdn1	Coding	Click Me	1	-0.103	143	-21.22	0	1	0	0	0	0	0	1520
tRF-49:70-chrM.Trp-TCA	ENSMUST00000022976.5	Washc5	Coding	Click Me	2	-0.304	298	-44.92	0	1	0	1	0	0	0	1232
tRF-49:70-chrM.Trp-TCA	ENSMUST00000033490.12	Ccdc120	Coding	Click Me	1	-0.316	168	-29.57	0	0	0	0	1	0	0	1448
tRF-49:70-chrM.Trp-TCA	ENSMUST00000067443.9	Slfn5	Coding	Click Me	1	-0.144	148	-20.37	0	0	0	0	0	1	0	3167
tRF-49:70-chrM.Trp-TCA	ENSMUST00000114792.7	Fkbp5	Coding	Click Me	1	-0.237	152	-29.97	0	0	1	0	0	0	0	1950
tRF-49:70-chrM.Trp-TCA	ENSMUST00000043829.10	Slc35e2	Coding	Click Me	1	-0.371	156	-27.91	0	0	0	0	1	0	0	1341
tRF-49:70-chrM.Trp-TCA	ENSMUST00000034172.7	Ces1d	Coding	Click Me	1	-0.12	147	-17.85	0	0	0	0	0	1	0	4590
tRF-49:70-chrM.Trp-TCA	ENSMUST00000108527.7	Dhx33	Coding	Click Me	1	-0.198	152	-23.48	0	0	0	0	0	1	0	3028
tRF-49:70-chrM.Trp-TCA	ENSMUST00000112268.2	Selenok	Coding	Click Me	1	-0.227	144	-21.02	0	1	0	0	0	0	0	1961
tRF-49:70-chrM.Trp-TCA	ENSMUST00000023911.10	Nagpa	Coding	Click Me	2	-0.389	308	-63.12	0	0	1	1	0	0	0	1275
tRF-49:70-chrM.Trp-TCA	ENSMUST00000113631.1	Rtl5	Coding	Click Me	2	-0.542	297	-45.84	0	0	0	1	1	0	0	2523
tRF-49:70-chrM.Trp-TCA	ENSMUST00000124586.1	BC029722	Coding	Click Me	2	-0.312	296	-51.27	0	1	0	1	0	0	0	1195
tRF-49:70-chrM.Trp-TCA	ENSMUST00000159704.7	Kif1bp	Coding	Click Me	1	-0.18	145	-23.33	0	1	0	0	0	0	0	4607
tRF-49:70-chrM.Trp-TCA	ENSMUST00000075447.13	Nectin2	Coding	Click Me	1	-0.446	165	-29.29	0	0	0	0	1	0	0	873
tRF-49:70-chrM.Trp-TCA	ENSMUST00000040117.14	Secisbp2	Coding	Click Me	1	-0.166	157	-27.05	0	0	0	1	0	0	0	2147
tRF-49:70-chrM.Trp-TCA	ENSMUST00000216213.1	Olfr1201	Coding	Click Me	2	-0.338	298	-46.18	0	0	0	1	0	1	0	1520
tRF-49:70-chrM.Trp-TCA	ENSMUST00000022535.8	Dcp1a	Coding	Click Me	1	-0.133	151	-21.08	0	0	0	1	0	0	0	3750
tRF-49:70-chrM.Trp-TCA	ENSMUST00000075869.12	Fbxo40	Coding	Click Me	1	-0.246	146	-26.08	0	0	1	0	0	0	0	2613
tRF-49:70-chrM.Trp-TCA	ENSMUST00000030588.12	Phc2	Coding	Click Me	1	-0.132	146	-27.14	0	1	0	0	0	0	0	2652
tRF-49:70-chrM.Trp-TCA	ENSMUST00000229191.1	Wnt7b	Coding	Click Me	1	-0.18	143	-26.13	0	1	0	0	0	0	0	979
tRF-49:70-chrM.Trp-TCA	ENSMUST00000215553.1	Olfr1396	Coding	Click Me	1	-0.259	165	-27.01	0	0	0	1	0	0	0	2795
tRF-49:70-chrM.Trp-TCA	ENSMUST00000041776.11	Rgs8	Coding	Click Me	2	-0.383	327	-63.22	0	0	0	1	1	0	0	7416
tRF-49:70-chrM.Trp-TCA	ENSMUST00000145910.8	Strn	Coding	Click Me	1	-0.257	147	-20.67	0	0	0	1	0	0	0	5577
tRF-49:70-chrM.Trp-TCA	ENSMUST00000033498.9	Timm17b	Coding	Click Me	1	-0.141	148	-21.02	0	1	0	0	0	0	0	2211
tRF-49:70-chrM.Trp-TCA	ENSMUST00000202651.3	Clock	Coding	Click Me	1	-0.215	141	-23.35	0	1	0	0	0	0	0	6831
tRF-49:70-chrM.Trp-TCA	ENSMUST00000179919.2	Samd11	Coding	Click Me	2	-0.427	285	-47.61	0	2	0	0	0	0	0	758
tRF-49:70-chrM.Trp-TCA	ENSMUST00000030814.10	Cdk5	Coding	Click Me	1	-0.145	144	-29.88	0	1	0	0	0	0	0	1148
tRF-49:70-chrM.Trp-TCA	ENSMUST00000025562.7	Incenp	Coding	Click Me	1	-0.165	161	-27.71	0	0	0	0	1	0	0	7768
tRF-49:70-chrM.Trp-TCA	ENSMUST00000045473.15	Tmcc2	Coding	Click Me	1	-0.235	151	-23.45	0	0	0	1	0	0	0	1191
tRF-49:70-chrM.Trp-TCA	ENSMUST00000203418.3	Olfr325	Coding	Click Me	1	-0.306	160	-28.48	0	0	0	1	0	0	0	539
tRF-49:70-chrM.Trp-TCA	ENSMUST00000096129.8	Il1rap	Coding	Click Me	1	-0.251	146	-17.73	0	0	0	1	0	0	0	2194
tRF-49:70-chrM.Trp-TCA	ENSMUST00000005820.10	Nr1i3	Coding	Click Me	1	-0.375	140	-33.55	0	0	1	0	0	0	0	127
tRF-49:70-chrM.Trp-TCA	ENSMUST00000069616.7	Tpsb2	Coding	Click Me	1	-0.253	145	-18.95	0	0	0	1	0	0	0	1257
tRF-49:70-chrM.Trp-TCA	ENSMUST00000112525.4	Pla2r1	Coding	Click Me	1	-0.231	144	-23.04	0	0	0	1	0	0	0	4960
tRF-49:70-chrM.Trp-TCA	ENSMUST00000043843.11	Lasp1	Coding	Click Me	1	-0.175	140	-25.8	0	1	0	0	0	0	0	2549
tRF-49:70-chrM.Trp-TCA	ENSMUST00000047749.6	4921524J17Rik	Coding	Click Me	1	-0.189	140	-19.28	0	1	0	0	0	0	0	2596
tRF-49:70-chrM.Trp-TCA	ENSMUST00000086075.12	Scarb1	Coding	Click Me	1	-0.146	157	-22.35	0	0	0	0	1	0	0	780
tRF-49:70-chrM.Trp-TCA	ENSMUST00000119003.1	Zfp617	Coding	Click Me	1	-0.205	148	-23.62	0	0	0	1	0	0	0	4280
tRF-49:70-chrM.Trp-TCA	ENSMUST00000166495.7	Dnajc1	Coding	Click Me	1	-0.105	167	-36.06	0	0	0	0	1	0	0	5042
tRF-49:70-chrM.Trp-TCA	ENSMUST00000030306.13	Hook1	Coding	Click Me	1	-0.197	144	-18.08	0	0	0	0	0	1	0	3076
tRF-49:70-chrM.Trp-TCA	ENSMUST00000034148.6	Il15	Coding	Click Me	1	-0.216	157	-27.88	0	0	0	0	0	1	0	4312
tRF-49:70-chrM.Trp-TCA	ENSMUST00000105406.7	Adarb1	Coding	Click Me	1	-0.218	152	-31.13	0	0	1	0	0	0	0	4054
tRF-49:70-chrM.Trp-TCA	ENSMUST00000002885.7	Epdr1	Coding	Click Me	1	-0.323	149	-25.26	0	0	0	0	1	0	0	1458
tRF-49:70-chrM.Trp-TCA	ENSMUST00000037391.11	Cd99l2	Coding	Click Me	1	-0.296	152	-20.44	0	0	0	0	1	0	0	4292
tRF-49:70-chrM.Trp-TCA	ENSMUST00000172306.2	Dusp7	Coding	Click Me	1	-0.146	154	-23.24	0	0	0	0	0	1	0	1778
tRF-49:70-chrM.Trp-TCA	ENSMUST00000048187.5	Ppp1r14a	Coding	Click Me	3	-0.628	442	-68.1	0	1	0	0	1	1	0	3644
tRF-49:70-chrM.Trp-TCA	ENSMUST00000033553.13	Heph	Coding	Click Me	1	-0.104	148	-23.87	0	1	0	0	0	0	0	5240
tRF-49:70-chrM.Trp-TCA	ENSMUST00000027929.9	Mark1	Coding	Click Me	1	-0.33	152	-29.81	0	0	1	0	0	0	0	2100
tRF-49:70-chrM.Trp-TCA	ENSMUST00000039784.11	Acaa1a	Coding	Click Me	1	-0.218	154	-18.42	0	0	0	0	0	1	0	5126
tRF-49:70-chrM.Trp-TCA	ENSMUST00000090785.8	Otud7b	Coding	Click Me	1	-0.145	145	-23.66	0	0	0	0	1	0	0	5161
tRF-49:70-chrM.Trp-TCA	ENSMUST00000023396.9	Pmm2	Coding	Click Me	1	-0.14	142	-19.54	1	0	0	0	0	0	0	3719
tRF-49:70-chrM.Trp-TCA	ENSMUST00000025198.13	Btnl2	Coding	Click Me	1	-0.186	151	-30.84	0	0	0	0	0	1	0	1587
tRF-49:70-chrM.Trp-TCA	ENSMUST00000029414.11	Ssr3	Coding	Click Me	1	-0.329	159	-23.77	0	0	0	1	0	0	0	3801
tRF-49:70-chrM.Trp-TCA	ENSMUST00000135383.8	Engase	Coding	Click Me	1	-0.119	142	-23	0	1	0	0	0	0	0	1703
tRF-49:70-chrM.Trp-TCA	ENSMUST00000060049.7	Haus3	Coding	Click Me	1	-0.124	145	-23.82	1	0	0	0	0	0	0	2858
tRF-49:70-chrM.Trp-TCA	ENSMUST00000046038.7	Slc25a28	Coding	Click Me	1	-0.163	144	-17.11	0	0	0	0	0	1	0	325
tRF-49:70-chrM.Trp-TCA	ENSMUST00000112940.7	Pdcl	Coding	Click Me	1	-0.195	147	-26.05	0	0	0	0	0	1	0	1243
tRF-49:70-chrM.Trp-TCA	ENSMUST00000001002.7	Heatr6	Coding	Click Me	1	-0.183	144	-21.02	0	1	0	0	0	0	0	5122
tRF-49:70-chrM.Trp-TCA	ENSMUST00000110857.4	Dld	Coding	Click Me	1	-0.403	150	-21.72	0	0	0	0	1	0	0	2618
tRF-49:70-chrM.Trp-TCA	ENSMUST00000003762.7	Has1	Coding	Click Me	1	-0.241	148	-16.31	0	0	0	1	0	0	0	301
tRF-49:70-chrM.Trp-TCA	ENSMUST00000090697.10	Syt6	Coding	Click Me	1	-0.27	151	-21.97	0	0	0	1	0	0	0	2783
tRF-49:70-chrM.Trp-TCA	ENSMUST00000099729.9	Lgals12	Coding	Click Me	1	-0.217	145	-19.82	0	0	0	1	0	0	0	1364
tRF-49:70-chrM.Trp-TCA	ENSMUST00000194595.1	Gm4858	Coding	Click Me	1	-0.217	165	-28.33	0	0	0	1	0	0	0	872
tRF-49:70-chrM.Trp-TCA	ENSMUST00000106267.4	Stx1b	Coding	Click Me	1	-0.103	147	-29.05	0	1	0	0	0	0	0	3410
tRF-49:70-chrM.Trp-TCA	ENSMUST00000078626.7	Trank1	Coding	Click Me	1	-0.154	141	-25.56	0	1	0	0	0	0	0	1417
tRF-49:70-chrM.Trp-TCA	ENSMUST00000022791.8	Fbxo4	Coding	Click Me	1	-0.154	153	-20.47	0	0	0	0	0	1	0	2140
tRF-49:70-chrM.Trp-TCA	ENSMUST00000170341.2	Vmn2r14	Coding	Click Me	1	-0.223	170	-31.06	0	0	0	1	0	0	0	3968
tRF-49:70-chrM.Trp-TCA	ENSMUST00000078074.8	Tank	Coding	Click Me	1	-0.469	140	-26.83	0	0	1	0	0	0	0	616
tRF-49:70-chrM.Trp-TCA	ENSMUST00000037275.5	Ccdc15	Coding	Click Me	1	-0.105	145	-22.18	0	0	0	0	1	0	0	9112
tRF-49:70-chrM.Trp-TCA	ENSMUST00000053202.11	Rhbdl2	Coding	Click Me	1	-0.206	140	-20.35	0	1	0	0	0	0	0	1826
tRF-49:70-chrM.Trp-TCA	ENSMUST00000035099.8	Gorasp1	Coding	Click Me	1	-0.111	148	-24.82	0	1	0	0	0	0	0	2519
tRF-49:70-chrM.Trp-TCA	ENSMUST00000037831.13	H1foo	Coding	Click Me	1	-0.185	147	-24.91	0	1	0	0	0	0	0	155
tRF-49:70-chrM.Trp-TCA	ENSMUST00000000329.8	Alox12	Coding	Click Me	1	-0.184	144	-21.02	0	1	0	0	0	0	0	930
tRF-49:70-chrM.Trp-TCA	ENSMUST00000048807.11	Mis12	Coding	Click Me	1	-0.18	160	-29.44	1	0	0	0	0	0	0	1629
tRF-49:70-chrM.Trp-TCA	ENSMUST00000130325.7	Lsm6	Coding	Click Me	1	-0.251	156	-21.79	0	0	0	1	0	0	0	4405
tRF-49:70-chrM.Trp-TCA	ENSMUST00000076894.10	Cop1	Coding	Click Me	1	-0.106	151	-25.36	0	1	0	0	0	0	0	5090
tRF-49:70-chrM.Trp-TCA	ENSMUST00000024721.7	Rhag	Coding	Click Me	1	-0.384	144	-23.14	0	0	1	0	0	0	0	972
tRF-49:70-chrM.Trp-TCA	ENSMUST00000167459.2	Mbnl2	Coding	Click Me	1	-0.156	141	-22.34	0	1	0	0	0	0	0	2746
tRF-49:70-chrM.Trp-TCA	ENSMUST00000136501.1	Bola3	Coding	Click Me	2	-0.255	294	-45.21	0	1	0	0	0	1	0	1924
tRF-49:70-chrM.Trp-TCA	ENSMUST00000098817.2	Vps37a	Coding	Click Me	1	-0.15	147	-18.72	0	0	0	0	1	0	0	4859
tRF-49:70-chrM.Trp-TCA	ENSMUST00000092486.10	Adamts14	Coding	Click Me	1	-0.373	171	-32.07	0	0	0	0	1	0	0	1366
tRF-49:70-chrM.Trp-TCA	ENSMUST00000055843.8	Rbm15b	Coding	Click Me	1	-0.236	154	-20.55	0	0	0	0	0	1	0	3703
tRF-49:70-chrM.Trp-TCA	ENSMUST00000038421.7	Lsm1	Coding	Click Me	1	-0.258	150	-23.74	0	0	0	0	0	1	0	1877
tRF-49:70-chrM.Trp-TCA	ENSMUST00000168989.8	Kctd1	Coding	Click Me	1	-0.112	145	-18.57	0	0	0	1	0	0	0	3985
tRF-49:70-chrM.Trp-TCA	ENSMUST00000169913.7	Insc	Coding	Click Me	1	-0.338	144	-19.58	0	0	0	1	0	0	0	457
tRF-49:70-chrM.Trp-TCA	ENSMUST00000034848.13	Psma4	Coding	Click Me	1	-0.192	155	-19.35	0	0	0	0	0	1	0	1409
tRF-49:70-chrM.Trp-TCA	ENSMUST00000015749.6	Srf	Coding	Click Me	1	-0.196	143	-22.38	0	0	0	1	0	0	0	2244
tRF-49:70-chrM.Trp-TCA	ENSMUST00000041638.7	Gtf3c3	Coding	Click Me	1	-0.49	146	-23.49	0	0	1	0	0	0	0	2481
tRF-49:70-chrM.Trp-TCA	ENSMUST00000123818.1	Oip5	Coding	Click Me	1	-0.256	150	-20.96	0	0	0	0	0	1	0	1828
tRF-49:70-chrM.Trp-TCA	ENSMUST00000216475.1	Olfr140	Coding	Click Me	1	-0.239	160	-27.52	0	0	0	1	0	0	0	2034
tRF-49:70-chrM.Trp-TCA	ENSMUST00000041407.6	Sostdc1	Coding	Click Me	1	-0.201	148	-20.29	0	1	0	0	0	0	0	1005
tRF-49:70-chrM.Trp-TCA	ENSMUST00000107596.8	Srcin1	Coding	Click Me	2	-0.27	287	-43.76	0	1	0	0	0	1	0	3181
tRF-49:70-chrM.Trp-TCA	ENSMUST00000003469.7	Cd79a	Coding	Click Me	1	-0.318	146	-24.22	0	0	1	0	0	0	0	660
tRF-49:70-chrM.Trp-TCA	ENSMUST00000043915.3	Serpina12	Coding	Click Me	1	-0.42	157	-28.8	0	0	0	0	1	0	0	2250
tRF-49:70-chrM.Trp-TCA	ENSMUST00000109422.7	Ppara	Coding	Click Me	1	-0.14	158	-33.51	0	0	0	0	1	0	0	5593
tRF-49:70-chrM.Trp-TCA	ENSMUST00000171319.3	Gm3646	Coding	Click Me	1	-0.119	159	-24.39	0	0	0	0	1	0	0	4880
tRF-49:70-chrM.Trp-TCA	ENSMUST00000113862.7	Kcnj15	Coding	Click Me	1	-0.262	142	-21.65	0	0	0	1	0	0	0	3482
tRF-49:70-chrM.Trp-TCA	ENSMUST00000154256.2	Zfp703	Coding	Click Me	1	-0.156	142	-26.17	0	0	1	0	0	0	0	2602
tRF-49:70-chrM.Trp-TCA	ENSMUST00000023113.6	Polr3h	Coding	Click Me	2	-0.545	300	-46.32	0	0	0	0	1	1	0	1625
tRF-49:70-chrM.Trp-TCA	ENSMUST00000032809.9	Yif1b	Coding	Click Me	1	-0.178	146	-19.16	0	0	0	1	0	0	0	137
tRF-49:70-chrM.Trp-TCA	ENSMUST00000124341.7	Slc4a3	Coding	Click Me	4	-0.918	617	-106.45	0	0	1	2	1	0	0	4963
tRF-49:70-chrM.Trp-TCA	ENSMUST00000041962.15	Grip1	Coding	Click Me	1	-0.242	147	-21.01	0	1	0	0	0	0	0	1644
tRF-49:70-chrM.Trp-TCA	ENSMUST00000040065.3	Tlr13	Coding	Click Me	1	-0.41	154	-22.81	0	0	0	0	1	0	0	859
tRF-49:70-chrM.Trp-TCA	ENSMUST00000065745.9	Rxfp2	Coding	Click Me	1	-0.453	164	-29.89	0	0	0	0	1	0	0	1343
tRF-49:70-chrM.Trp-TCA	ENSMUST00000037923.4	Rbm24	Coding	Click Me	1	-0.449	149	-22.54	0	0	0	0	1	0	0	1782
tRF-49:70-chrM.Trp-TCA	ENSMUST00000036584.11	Pank1	Coding	Click Me	1	-0.151	149	-22.82	0	0	0	1	0	0	0	5396
tRF-49:70-chrM.Trp-TCA	ENSMUST00000108759.2	Slc35f3	Coding	Click Me	1	-0.187	140	-23.48	0	1	0	0	0	0	0	1310
tRF-49:70-chrM.Trp-TCA	ENSMUST00000050970.3	Polr1d	Coding	Click Me	2	-0.636	301	-51.9	0	0	1	0	1	0	0	2486
tRF-49:70-chrM.Trp-TCA	ENSMUST00000036680.7	Thap3	Coding	Click Me	2	-0.315	294	-50.3	0	1	0	1	0	0	0	2252
tRF-49:70-chrM.Trp-TCA	ENSMUST00000023924.3	Rpp14	Coding	Click Me	3	-0.472	455	-72.57	0	2	0	1	0	0	0	5053
tRF-49:70-chrM.Trp-TCA	ENSMUST00000054173.3	Phospho1	Coding	Click Me	1	-0.421	151	-21.87	0	0	0	0	1	0	0	831
tRF-49:70-chrM.Trp-TCA	ENSMUST00000037865.12	Atp6v0a2	Coding	Click Me	1	-0.299	148	-24.23	0	0	0	1	0	0	0	2652
tRF-49:70-chrM.Trp-TCA	ENSMUST00000084366.12	Osbpl9	Coding	Click Me	2	-0.553	297	-40.93	0	0	0	2	0	0	0	1119
tRF-49:70-chrM.Trp-TCA	ENSMUST00000018691.8	Pip4k2b	Coding	Click Me	1	-0.202	154	-28.24	0	0	0	1	0	0	0	3702
tRF-49:70-chrM.Trp-TCA	ENSMUST00000032185.8	Slc6a6	Coding	Click Me	1	-0.136	146	-20.17	0	0	0	1	0	0	0	4006
tRF-49:70-chrM.Trp-TCA	ENSMUST00000135986.8	Ccdc13	Coding	Click Me	1	-0.194	152	-22.9	0	0	0	0	1	0	0	4499
tRF-49:70-chrM.Trp-TCA	ENSMUST00000045802.6	Pclaf	Coding	Click Me	1	-0.193	140	-20.35	0	1	0	0	0	0	0	3801
tRF-49:70-chrM.Trp-TCA	ENSMUST00000182515.7	Mzf1	Coding	Click Me	1	-0.186	144	-24.03	0	1	0	0	0	0	0	965
tRF-49:70-chrM.Trp-TCA	ENSMUST00000024734.7	Mrpl14	Coding	Click Me	1	-0.109	153	-25.81	0	0	0	0	1	0	0	4678
tRF-49:70-chrM.Trp-TCA	ENSMUST00000068106.4	Smim10l2a	Coding	Click Me	1	-0.271	144	-23.14	0	0	1	0	0	0	0	5184
tRF-49:70-chrM.Trp-TCA	ENSMUST00000112387.8	Hyal1	Coding	Click Me	1	-0.163	151	-22.62	0	0	0	1	0	0	0	1237
tRF-49:70-chrM.Trp-TCA	ENSMUST00000026994.13	Unc5a	Coding	Click Me	1	-0.369	143	-29.87	0	0	1	0	0	0	0	1047
tRF-49:70-chrM.Trp-TCA	ENSMUST00000184945.7	Nav2	Coding	Click Me	1	-0.152	155	-26.93	0	0	0	1	0	0	0	3269
tRF-49:70-chrM.Trp-TCA	ENSMUST00000051572.7	Cavin2	Coding	Click Me	1	-0.12	158	-27.53	0	0	0	1	0	0	0	8648
tRF-49:70-chrM.Trp-TCA	ENSMUST00000033414.7	Slc6a14	Coding	Click Me	1	-0.455	144	-25.23	0	0	1	0	0	0	0	2350
tRF-49:70-chrM.Trp-TCA	ENSMUST00000027036.10	Lypla1	Coding	Click Me	1	-0.106	144	-21.02	0	1	0	0	0	0	0	2729
tRF-49:70-chrM.Trp-TCA	ENSMUST00000064709.12	BC004004	Coding	Click Me	1	-0.249	148	-23.86	0	0	0	1	0	0	0	1452
tRF-49:70-chrM.Trp-TCA	ENSMUST00000166487.9	Dnajb11	Coding	Click Me	1	-0.176	148	-18.79	0	0	0	0	0	1	0	4190
tRF-49:70-chrM.Trp-TCA	ENSMUST00000089162.4	Edem1	Coding	Click Me	2	-0.258	294	-42.91	1	0	0	0	1	0	0	6475
tRF-49:70-chrM.Trp-TCA	ENSMUST00000170719.1	Sftpa1	Coding	Click Me	1	-0.129	141	-32.14	1	0	0	0	0	0	0	5030
tRF-49:70-chrM.Trp-TCA	ENSMUST00000094053.6	Tnrc6a	Coding	Click Me	1	-0.157	140	-23.06	0	1	0	0	0	0	0	2345
tRF-49:70-chrM.Trp-TCA	ENSMUST00000060188.13	Ppp1r2	Coding	Click Me	1	-0.101	157	-30.14	0	0	0	0	0	1	0	10390
tRF-49:70-chrM.Trp-TCA	ENSMUST00000073152.12	Fastkd1	Coding	Click Me	1	-0.208	148	-21.02	0	1	0	0	0	0	0	3412
tRF-49:70-chrM.Trp-TCA	ENSMUST00000085701.6	Tecpr1	Coding	Click Me	1	-0.127	158	-28.43	0	0	0	0	0	1	0	1474
tRF-49:70-chrM.Trp-TCA	ENSMUST00000089157.10	Cenpm	Coding	Click Me	2	-0.497	299	-48.73	0	1	0	0	1	0	0	2864
tRF-49:70-chrM.Trp-TCA	ENSMUST00000000451.13	Raf1	Coding	Click Me	1	-0.237	172	-34.83	0	0	0	1	0	0	0	697
tRF-49:70-chrM.Trp-TCA	ENSMUST00000160424.7	Cacna1i	Coding	Click Me	1	-0.39	147	-27.42	0	0	1	0	0	0	0	2633
tRF-49:70-chrM.Trp-TCA	ENSMUST00000032486.12	Cd27	Coding	Click Me	2	-0.409	283	-54.79	1	1	0	0	0	0	0	693
tRF-49:70-chrM.Trp-TCA	ENSMUST00000024805.14	Cpne5	Coding	Click Me	1	-0.394	178	-34.66	0	0	0	0	1	0	0	2501
tRF-49:70-chrM.Trp-TCA	ENSMUST00000208199.1	Samd4b	Coding	Click Me	1	-0.233	144	-24.54	0	0	0	0	1	0	0	2067
tRF-49:70-chrM.Trp-TCA	ENSMUST00000034618.5	Pdzd3	Coding	Click Me	1	-0.381	166	-34.62	0	0	1	0	0	0	0	871
tRF-49:70-chrM.Trp-TCA	ENSMUST00000166117.3	Gen1	Coding	Click Me	1	-0.104	158	-24.15	0	1	0	0	0	0	0	2344
tRF-49:70-chrM.Trp-TCA	ENSMUST00000113878.7	Arhgef9	Coding	Click Me	1	-0.144	178	-28.72	0	0	0	1	0	0	0	3029
tRF-49:70-chrM.Trp-TCA	ENSMUST00000040577.4	Mrm3	Coding	Click Me	1	-0.153	154	-19.89	0	0	0	0	0	1	0	2822
tRF-49:70-chrM.Trp-TCA	ENSMUST00000071852.9	Commd7	Coding	Click Me	2	-0.359	299	-40.63	0	1	0	1	0	0	0	2809
tRF-49:70-chrM.Trp-TCA	ENSMUST00000100024.2	Fgf12	Coding	Click Me	1	-0.335	140	-26.38	0	0	1	0	0	0	0	6394
tRF-49:70-chrM.Trp-TCA	ENSMUST00000120269.10	Itih4	Coding	Click Me	1	-0.381	150	-27.62	0	0	0	0	1	0	0	649
tRF-49:70-chrM.Trp-TCA	ENSMUST00000020986.14	Dnajc27	Coding	Click Me	1	-0.13	156	-27.7	0	0	0	1	0	0	0	3679
tRF-49:70-chrM.Trp-TCA	ENSMUST00000033626.14	Serpina7	Coding	Click Me	1	-0.261	146	-17.28	0	0	0	0	0	1	0	1035
tRF-49:70-chrM.Trp-TCA	ENSMUST00000112863.7	Pak3	Coding	Click Me	2	-0.363	294	-45.95	0	0	1	0	1	0	0	6468
tRF-49:70-chrM.Trp-TCA	ENSMUST00000107737.10	Sphk2	Coding	Click Me	1	-0.198	143	-25.7	0	1	0	0	0	0	0	1262
tRF-49:70-chrM.Trp-TCA	ENSMUST00000066583.1	Gm9925	Coding	Click Me	1	-0.209	141	-23.5	0	0	0	1	0	0	0	2927
tRF-49:70-chrM.Trp-TCA	ENSMUST00000113078.7	Fbxw2	Coding	Click Me	1	-0.187	144	-25.98	0	1	0	0	0	0	0	373
tRF-49:70-chrM.Trp-TCA	ENSMUST00000109102.3	Cdyl2	Coding	Click Me	1	-0.311	149	-27.76	0	0	0	0	1	0	0	6405
tRF-49:70-chrM.Trp-TCA	ENSMUST00000095938.9	AI854703	Coding	Click Me	1	-0.209	169	-30.8	0	0	0	1	0	0	0	2527
tRF-49:70-chrM.Trp-TCA	ENSMUST00000031144.13	Tmem165	Coding	Click Me	1	-0.348	151	-22.52	0	0	0	0	1	0	0	2445
tRF-49:70-chrM.Trp-TCA	ENSMUST00000034745.8	Myo1e	Coding	Click Me	1	-0.189	144	-21.02	0	1	0	0	0	0	0	1529
tRF-49:70-chrM.Trp-TCA	ENSMUST00000053880.12	Grin2b	Coding	Click Me	1	-0.118	165	-30.18	0	0	0	0	1	0	0	18901
tRF-49:70-chrM.Trp-TCA	ENSMUST00000075221.2	Osm	Coding	Click Me	1	-0.241	155	-27.43	0	0	0	1	0	0	0	1017
tRF-49:70-chrM.Trp-TCA	ENSMUST00000217237.1	Olfr1238	Coding	Click Me	1	-0.25	145	-29.58	0	0	1	0	0	0	0	4139
tRF-49:70-chrM.Trp-TCA	ENSMUST00000000641.14	Sema4f	Coding	Click Me	1	-0.242	169	-29.47	0	0	0	0	0	1	0	1610
tRF-49:70-chrM.Trp-TCA	ENSMUST00000022195.11	Otp	Coding	Click Me	1	-0.408	158	-28.69	0	0	0	0	1	0	0	3192
tRF-49:70-chrM.Trp-TCA	ENSMUST00000070911.3	Apol8	Coding	Click Me	1	-0.18	160	-25.19	0	0	0	1	0	0	0	1558
tRF-49:70-chrM.Trp-TCA	ENSMUST00000109214.7	Rnf114	Coding	Click Me	1	-0.119	141	-21.49	0	1	0	0	0	0	0	1435
tRF-49:70-chrM.Trp-TCA	ENSMUST00000007959.13	Rhoa	Coding	Click Me	1	-0.163	144	-32.52	0	1	0	0	0	0	0	1126
tRF-49:70-chrM.Trp-TCA	ENSMUST00000047281.9	Trir	Coding	Click Me	1	-0.163	144	-21.02	0	1	0	0	0	0	0	5126
tRF-49:70-chrM.Trp-TCA	ENSMUST00000027601.10	Mcm6	Coding	Click Me	1	-0.404	144	-22.88	0	0	1	0	0	0	0	364
tRF-49:70-chrM.Trp-TCA	ENSMUST00000025702.13	Snx15	Coding	Click Me	1	-0.272	166	-33.91	0	0	0	1	0	0	0	485
tRF-49:70-chrM.Trp-TCA	ENSMUST00000103221.9	Mtor	Coding	Click Me	1	-0.185	146	-23.31	0	0	0	1	0	0	0	825
tRF-49:70-chrM.Trp-TCA	ENSMUST00000017981.9	Nkiras2	Coding	Click Me	1	-0.112	162	-30.32	0	0	0	1	0	0	0	1387
tRF-49:70-chrM.Trp-TCA	ENSMUST00000050872.14	Nfib	Coding	Click Me	1	-0.219	160	-30.78	0	0	0	0	0	1	0	6509
tRF-49:70-chrM.Trp-TCA	ENSMUST00000001254.5	Slc26a3	Coding	Click Me	1	-0.2	161	-27.38	0	0	0	1	0	0	0	5148
tRF-49:70-chrM.Trp-TCA	ENSMUST00000094216.4	Tlnrd1	Coding	Click Me	1	-0.145	145	-21.75	0	0	0	1	0	0	0	3785
tRF-49:70-chrM.Trp-TCA	ENSMUST00000040561.5	Rundc1	Coding	Click Me	1	-0.206	142	-16.1	0	0	0	1	0	0	0	4273
tRF-49:70-chrM.Trp-TCA	ENSMUST00000092639.11	Lama2	Coding	Click Me	1	-0.233	151	-25.35	0	0	0	1	0	0	0	1698
tRF-49:70-chrM.Trp-TCA	ENSMUST00000008462.10	Relt	Coding	Click Me	1	-0.428	147	-27.58	0	0	0	0	1	0	0	1382
tRF-49:70-chrM.Trp-TCA	ENSMUST00000217616.2	Olfr498	Coding	Click Me	1	-0.272	163	-23.15	0	0	0	1	0	0	0	1267
tRF-49:70-chrM.Trp-TCA	ENSMUST00000063562.8	Mipep	Coding	Click Me	2	-0.457	308	-53.61	0	0	0	1	0	1	0	3647
tRF-49:70-chrM.Trp-TCA	ENSMUST00000059428.6	Ccdc149	Coding	Click Me	2	-0.607	305	-58.51	0	1	0	0	1	0	0	1598
tRF-49:70-chrM.Trp-TCA	ENSMUST00000033058.13	Sbf2	Coding	Click Me	1	-0.343	167	-29.54	0	0	0	0	1	0	0	1376
tRF-49:70-chrM.Trp-TCA	ENSMUST00000164822.7	Rcbtb2	Coding	Click Me	1	-0.352	142	-23.39	0	0	0	0	1	0	0	1616
tRF-49:70-chrM.Trp-TCA	ENSMUST00000026899.3	Slc25a10	Coding	Click Me	1	-0.217	144	-21.02	0	1	0	0	0	0	0	4436
tRF-49:70-chrM.Trp-TCA	ENSMUST00000056153.7	Fads6	Coding	Click Me	2	-0.346	288	-41.6	0	2	0	0	0	0	0	4876
tRF-49:70-chrM.Trp-TCA	ENSMUST00000056773.14	Sdccag8	Coding	Click Me	1	-0.288	141	-22.18	0	0	0	0	1	0	0	1951
tRF-49:70-chrM.Trp-TCA	ENSMUST00000027629.9	Tfcp2l1	Coding	Click Me	1	-0.198	152	-23.9	0	0	0	0	1	0	0	7734
tRF-49:70-chrM.Trp-TCA	ENSMUST00000109736.8	Rnaseh2a	Coding	Click Me	1	-0.396	151	-20.8	0	0	0	0	1	0	0	1122
tRF-49:70-chrM.Trp-TCA	ENSMUST00000032130.7	Aplf	Coding	Click Me	2	-0.325	293	-50.14	0	0	1	0	0	1	0	3678
tRF-49:70-chrM.Trp-TCA	ENSMUST00000029806.12	Dapp1	Coding	Click Me	1	-0.124	144	-20.28	1	0	0	0	0	0	0	2130
tRF-49:70-chrM.Trp-TCA	ENSMUST00000115077.7	Abcb8	Coding	Click Me	3	-0.572	451	-71.44	0	1	0	0	2	0	0	2444
tRF-49:70-chrM.Trp-TCA	ENSMUST00000113855.7	Kcnj15	Coding	Click Me	1	-0.262	142	-21.65	0	0	0	1	0	0	0	3482
tRF-49:70-chrM.Trp-TCA	ENSMUST00000037154.13	Kcnj15	Coding	Click Me	1	-0.262	142	-21.65	0	0	0	1	0	0	0	3482
tRF-49:70-chrM.Trp-TCA	ENSMUST00000030898.11	Arhgef16	Coding	Click Me	1	-0.262	147	-23.31	0	1	0	0	0	0	0	2709
tRF-49:70-chrM.Trp-TCA	ENSMUST00000024946.6	Eci1	Coding	Click Me	1	-0.24	144	-22.8	0	1	0	0	0	0	0	996
tRF-49:70-chrM.Trp-TCA	ENSMUST00000073124.8	Zfp746	Coding	Click Me	1	-0.121	142	-24.94	0	1	0	0	0	0	0	1457
tRF-49:70-chrM.Trp-TCA	ENSMUST00000107598.8	Akap2	Coding	Click Me	1	-0.25	151	-21.38	0	0	0	1	0	0	0	4028
tRF-49:70-chrM.Trp-TCA	ENSMUST00000164415.1	Klhl33	Coding	Click Me	1	-0.155	148	-22.58	0	1	0	0	0	0	0	2815
tRF-49:70-chrM.Trp-TCA	ENSMUST00000166355.2	Vmn2r74	Coding	Click Me	1	-0.121	156	-22.02	0	0	0	0	1	0	0	7253
tRF-49:70-chrM.Trp-TCA	ENSMUST00000164787.7	Cdh18	Coding	Click Me	1	-0.108	145	-31.43	1	0	0	0	0	0	0	1901
tRF-49:70-chrM.Trp-TCA	ENSMUST00000002663.11	Pon1	Coding	Click Me	1	-0.222	160	-25.3	0	0	0	1	0	0	0	1052
tRF-49:70-chrM.Trp-TCA	ENSMUST00000168779.2	2210408I21Rik	Coding	Click Me	1	-0.303	144	-19.17	0	0	0	1	0	0	0	1145
tRF-49:70-chrM.Trp-TCA	ENSMUST00000123605.8	Dhodh	Coding	Click Me	1	-0.251	156	-27.4	0	0	0	1	0	0	0	600
tRF-49:70-chrM.Trp-TCA	ENSMUST00000111810.1	Rgs8	Coding	Click Me	2	-0.383	327	-63.22	0	0	0	1	1	0	0	4760
tRF-49:70-chrM.Trp-TCA	ENSMUST00000162592.7	Zfp27	Coding	Click Me	2	-0.315	310	-53.52	0	1	0	1	0	0	0	3068
tRF-49:70-chrM.Trp-TCA	ENSMUST00000152855.1	Nhej1	Coding	Click Me	2	-0.406	297	-57.23	0	0	0	2	0	0	0	3960
tRF-49:70-chrM.Trp-TCA	ENSMUST00000217998.1	Pigh	Coding	Click Me	1	-0.113	150	-21.91	0	1	0	0	0	0	0	2338
tRF-49:70-chrM.Trp-TCA	ENSMUST00000217934.1	Samd11	Coding	Click Me	2	-0.427	285	-47.61	0	2	0	0	0	0	0	548
tRF-49:70-chrM.Trp-TCA	ENSMUST00000128646.7	Phactr1	Coding	Click Me	1	-0.228	146	-19.07	0	0	0	0	1	0	0	3335
tRF-49:70-chrM.Trp-TCA	ENSMUST00000054883.3	Pou3f3	Coding	Click Me	1	-0.323	149	-24.05	0	0	0	0	1	0	0	6105
tRF-49:70-chrM.Trp-TCA	ENSMUST00000106933.1	Dnajc6	Coding	Click Me	1	-0.149	140	-25.66	0	1	0	0	0	0	0	2209
tRF-49:70-chrM.Trp-TCA	ENSMUST00000218788.1	Samd11	Coding	Click Me	2	-0.427	285	-47.61	0	2	0	0	0	0	0	548
tRF-49:70-chrM.Trp-TCA	ENSMUST00000025590.9	Osbp	Coding	Click Me	1	-0.139	151	-27.38	0	0	0	1	0	0	0	2072
tRF-49:70-chrM.Trp-TCA	ENSMUST00000107818.8	Ankrd40	Coding	Click Me	2	-0.337	311	-54.12	0	0	0	1	1	0	0	3913
tRF-49:70-chrM.Trp-TCA	ENSMUST00000024627.13	Chd1	Coding	Click Me	1	-0.121	154	-23.37	0	0	0	0	0	1	0	4378
tRF-49:70-chrM.Trp-TCA	ENSMUST00000058196.12	Susd3	Coding	Click Me	3	-0.741	443	-69.11	0	1	0	0	0	2	0	3305
tRF-49:70-chrM.Trp-TCA	ENSMUST00000005234.12	Wdr1	Coding	Click Me	2	-0.326	303	-49.7	1	0	0	1	0	0	0	3037
tRF-49:70-chrM.Trp-TCA	ENSMUST00000210616.1	Letm2	Coding	Click Me	1	-0.106	147	-23.27	0	1	0	0	0	0	0	2044
tRF-49:70-chrM.Trp-TCA	ENSMUST00000111508.8	Olfr1262	Coding	Click Me	1	-0.156	148	-21.02	0	1	0	0	0	0	0	4969
tRF-49:70-chrM.Trp-TCA	ENSMUST00000171155.3	Klhl25	Coding	Click Me	2	-0.506	305	-62.01	1	0	0	0	1	0	0	1458
tRF-49:70-chrM.Trp-TCA	ENSMUST00000048896.7	Fbrs	Coding	Click Me	1	-0.28	151	-20.06	0	0	0	0	0	1	0	3757
tRF-49:70-chrM.Trp-TCA	ENSMUST00000112320.7	Spc25	Coding	Click Me	1	-0.133	141	-23.52	0	1	0	0	0	0	0	5104
tRF-49:70-chrM.Trp-TCA	ENSMUST00000116457.8	Cd82	Coding	Click Me	1	-0.405	147	-18.8	0	0	0	0	1	0	0	749
tRF-49:70-chrM.Trp-TCA	ENSMUST00000057279.5	Olfml2a	Coding	Click Me	1	-0.177	144	-21.02	0	1	0	0	0	0	0	4921
tRF-49:70-chrM.Trp-TCA	ENSMUST00000037341.13	Nhsl1	Coding	Click Me	1	-0.286	158	-26.19	0	0	0	0	0	1	0	3028
tRF-49:70-chrM.Trp-TCA	ENSMUST00000103064.9	Pitpnc1	Coding	Click Me	2	-0.369	301	-46.2	0	0	0	0	2	0	0	4764
tRF-49:70-chrM.Trp-TCA	ENSMUST00000113800.8	B3galt5	Coding	Click Me	1	-0.144	140	-19.01	0	1	0	0	0	0	0	3764
tRF-49:70-chrM.Trp-TCA	ENSMUST00000048359.4	Tango6	Coding	Click Me	1	-0.153	144	-21.02	0	1	0	0	0	0	0	4191
tRF-49:70-chrM.Trp-TCA	ENSMUST00000064231.7	Mogat2	Coding	Click Me	1	-0.199	141	-26.21	1	0	0	0	0	0	0	728
tRF-49:70-chrM.Trp-TCA	ENSMUST00000051864.4	Sstr5	Coding	Click Me	1	-0.261	150	-21.77	0	0	0	0	0	1	0	1290
tRF-49:70-chrM.Trp-TCA	ENSMUST00000102491.9	Crocc	Coding	Click Me	1	-0.113	141	-23.57	0	1	0	0	0	0	0	416
tRF-49:70-chrM.Trp-TCA	ENSMUST00000022135.14	Ak6	Coding	Click Me	1	-0.208	152	-28.01	0	1	0	0	0	0	0	405
tRF-49:70-chrM.Trp-TCA	ENSMUST00000147563.8	Zdhhc3	Coding	Click Me	1	-0.127	144	-24.04	0	0	0	1	0	0	0	5853
tRF-49:70-chrM.Trp-TCA	ENSMUST00000034076.15	Cbln1	Coding	Click Me	1	-0.223	150	-23.21	0	0	0	1	0	0	0	1401
tRF-49:70-chrM.Trp-TCA	ENSMUST00000050611.13	Cep68	Coding	Click Me	3	-0.61	435	-71.87	0	2	1	0	0	0	0	4063
tRF-49:70-chrM.Trp-TCA	ENSMUST00000208232.1	Arnt2	Coding	Click Me	1	-0.142	142	-26.8	0	1	0	0	0	0	0	3775
tRF-49:70-chrM.Trp-TCA	ENSMUST00000224163.1	Il3ra	Coding	Click Me	1	-0.134	140	-22.24	0	1	0	0	0	0	0	585
tRF-49:70-chrM.Trp-TCA	ENSMUST00000033427.6	Sash3	Coding	Click Me	1	-0.556	170	-33.71	0	0	0	0	1	0	0	1309
tRF-49:70-chrM.Trp-TCA	ENSMUST00000020008.9	Gopc	Coding	Click Me	1	-0.15	142	-20.28	0	0	0	1	0	0	0	2671
tRF-49:70-chrM.Trp-TCA	ENSMUST00000027056.11	Prex2	Coding	Click Me	1	-0.106	158	-28.31	0	0	0	0	0	1	0	5929
tRF-49:70-chrM.Trp-TCA	ENSMUST00000033621.6	Gla	Coding	Click Me	1	-0.176	144	-21.77	0	1	0	0	0	0	0	1727
tRF-49:70-chrM.Trp-TCA	ENSMUST00000119270.1	Slc26a1	Coding	Click Me	1	-0.203	154	-24.33	0	0	0	0	0	1	0	683
tRF-49:70-chrM.Trp-TCA	ENSMUST00000010807.4	Fads1	Coding	Click Me	1	-0.1	154	-26.87	0	1	0	0	0	0	0	1950
tRF-49:70-chrM.Trp-TCA	ENSMUST00000067754.10	Rab37	Coding	Click Me	1	-0.155	165	-27.26	0	0	0	1	0	0	0	1500
tRF-49:70-chrM.Trp-TCA	ENSMUST00000167708.3	Atxn1	Coding	Click Me	1	-0.147	146	-24.99	1	0	0	0	0	0	0	626
tRF-49:70-chrM.Trp-TCA	ENSMUST00000043990.13	Edc3	Coding	Click Me	2	-0.806	295	-52.08	0	0	0	0	2	0	0	4004
tRF-49:70-chrM.Trp-TCA	ENSMUST00000024056.9	Ube2j2	Coding	Click Me	1	-0.111	157	-24.03	0	0	0	1	0	0	0	2239
tRF-49:70-chrM.Trp-TCA	ENSMUST00000172140.2	Vmn2r8	Coding	Click Me	1	-0.22	140	-23.21	0	1	0	0	0	0	0	5350
tRF-49:70-chrM.Trp-TCA	ENSMUST00000053094.7	Mindy4	Coding	Click Me	3	-0.668	463	-77.63	0	0	0	2	1	0	0	4118
tRF-49:70-chrM.Trp-TCA	ENSMUST00000016640.7	Cd274	Coding	Click Me	1	-0.151	144	-26.67	1	0	0	0	0	0	0	2683
tRF-49:70-chrM.Trp-TCA	ENSMUST00000215529.2	Olfr1198	Coding	Click Me	1	-0.15	156	-33.5	0	1	0	0	0	0	0	1990
tRF-49:70-chrM.Trp-TCA	ENSMUST00000107164.2	Cd300lg	Coding	Click Me	2	-0.567	289	-53.87	0	0	2	0	0	0	0	1407
tRF-49:70-chrM.Trp-TCA	ENSMUST00000037048.8	Mmd2	Coding	Click Me	1	-0.246	153	-23.65	0	0	0	0	1	0	0	2373
tRF-49:70-chrM.Trp-TCA	ENSMUST00000186239.6	Cep57l1	Coding	Click Me	1	-0.248	167	-27.3	0	0	0	0	0	1	0	854
tRF-49:70-chrM.Trp-TCA	ENSMUST00000054212.6	Rab11fip1	Coding	Click Me	1	-0.391	158	-26.84	0	0	0	0	1	0	0	4403
tRF-49:70-chrM.Trp-TCA	ENSMUST00000214909.2	Olfr348	Coding	Click Me	1	-0.332	146	-26.8	0	0	1	0	0	0	0	2530
tRF-49:70-chrM.Trp-TCA	ENSMUST00000105560.1	Grm1	Coding	Click Me	1	-0.192	156	-26.76	0	0	0	0	1	0	0	1126
tRF-49:70-chrM.Trp-TCA	ENSMUST00000030420.8	Epha8	Coding	Click Me	1	-0.189	163	-27.85	0	0	0	0	0	1	0	1629
tRF-49:70-chrM.Trp-TCA	ENSMUST00000117386.1	Synpo2l	Coding	Click Me	1	-0.249	150	-19.38	0	0	0	1	0	0	0	883
tRF-49:70-chrM.Trp-TCA	ENSMUST00000065291.1	Cfap300	Coding	Click Me	1	-0.159	141	-22.88	0	1	0	0	0	0	0	1961
tRF-49:70-chrM.Trp-TCA	ENSMUST00000030339.12	Tnfrsf8	Coding	Click Me	1	-0.146	149	-30.29	0	1	0	0	0	0	0	1856
tRF-49:70-chrM.Trp-TCA	ENSMUST00000213925.1	Olfr1450	Coding	Click Me	1	-0.196	142	-20.41	0	1	0	0	0	0	0	1838
tRF-49:70-chrM.Trp-TCA	ENSMUST00000020820.1	Mrpl22	Coding	Click Me	1	-0.253	164	-25.3	0	0	0	1	0	0	0	2149
tRF-49:70-chrM.Trp-TCA	ENSMUST00000095087.10	Rapgef1	Coding	Click Me	1	-0.185	150	-26.75	0	0	0	1	0	0	0	2283
tRF-49:70-chrM.Trp-TCA	ENSMUST00000181998.7	Plekha7	Coding	Click Me	1	-0.207	148	-19.52	0	0	0	1	0	0	0	1305
tRF-49:70-chrM.Trp-TCA	ENSMUST00000048068.14	Arrdc4	Coding	Click Me	2	-0.431	280	-38.8	0	1	0	1	0	0	0	2483
tRF-49:70-chrM.Trp-TCA	ENSMUST00000016488.12	Ppdpf	Coding	Click Me	1	-0.189	140	-17.35	0	1	0	0	0	0	0	2077
tRF-49:70-chrM.Trp-TCA	ENSMUST00000026832.13	Jmjd8	Coding	Click Me	1	-0.208	161	-26.55	0	0	0	1	0	0	0	1253
tRF-49:70-chrM.Trp-TCA	ENSMUST00000001780.9	Akt1	Coding	Click Me	1	-0.195	155	-26.2	0	0	0	1	0	0	0	877
tRF-49:70-chrM.Trp-TCA	ENSMUST00000040487.3	Rsad1	Coding	Click Me	1	-0.23	162	-25.47	0	0	0	0	0	1	0	2732
tRF-49:70-chrM.Trp-TCA	ENSMUST00000228936.1	ccdc198	Coding	Click Me	1	-0.142	149	-21.3	0	0	0	1	0	0	0	2484
tRF-49:70-chrM.Trp-TCA	ENSMUST00000025083.13	Kif5b	Coding	Click Me	1	-0.161	143	-24.42	0	1	0	0	0	0	0	3067
tRF-49:70-chrM.Trp-TCA	ENSMUST00000044711.6	Snx22	Coding	Click Me	1	-0.119	149	-25.45	0	1	0	0	0	0	0	1925
tRF-49:70-chrM.Trp-TCA	ENSMUST00000085792.4	Zfp940	Coding	Click Me	2	-0.517	296	-47.45	0	0	0	0	2	0	0	3830
tRF-49:70-chrM.Trp-TCA	ENSMUST00000031805.10	Avl9	Coding	Click Me	1	-0.251	143	-28.7	0	0	1	0	0	0	0	5294
tRF-49:70-chrM.Trp-TCA	ENSMUST00000043775.8	Kdm3b	Coding	Click Me	1	-0.442	157	-27.31	0	0	0	0	1	0	0	1700
tRF-49:70-chrM.Trp-TCA	ENSMUST00000038696.11	Ppp1r9b	Coding	Click Me	1	-0.12	157	-25.53	0	0	0	1	0	0	0	2737
tRF-49:70-chrM.Trp-TCA	ENSMUST00000088237.4	Nanos1	Coding	Click Me	1	-0.115	141	-20.72	1	0	0	0	0	0	0	2845
tRF-49:70-chrM.Trp-TCA	ENSMUST00000008991.6	Sptbn2	Coding	Click Me	1	-0.403	150	-24.5	0	0	1	0	0	0	0	1296
tRF-49:70-chrM.Trp-TCA	ENSMUST00000081349.8	Fmn1	Coding	Click Me	1	-0.162	163	-24.84	0	0	0	0	1	0	0	7307
tRF-49:70-chrM.Trp-TCA	ENSMUST00000177551.1	Nlrc3	Coding	Click Me	1	-0.17	151	-23.53	0	0	0	0	0	1	0	1839
tRF-49:70-chrM.Trp-TCA	ENSMUST00000020329.12	Egfr	Coding	Click Me	1	-0.19	153	-25.03	0	0	0	0	1	0	0	6303
tRF-49:70-chrM.Trp-TCA	ENSMUST00000162364.7	Mob4	Coding	Click Me	1	-0.13	151	-20.34	0	0	0	0	0	1	0	3794
tRF-49:70-chrM.Trp-TCA	ENSMUST00000215365.1	Olfr295	Coding	Click Me	1	-0.178	141	-17.88	0	0	0	0	0	1	0	4922
tRF-49:70-chrM.Trp-TCA	ENSMUST00000054316.8	1700029I15Rik	Coding	Click Me	1	-0.155	142	-23.48	0	1	0	0	0	0	0	650
tRF-49:70-chrM.Trp-TCA	ENSMUST00000105648.8	Kcnab2	Coding	Click Me	1	-0.209	140	-24.32	0	1	0	0	0	0	0	253
tRF-49:70-chrM.Trp-TCA	ENSMUST00000200397.4	St6galnac3	Coding	Click Me	2	-0.239	290	-46.05	0	1	0	1	0	0	0	7139
tRF-49:70-chrM.Trp-TCA	ENSMUST00000140523.7	Slc38a6	Coding	Click Me	1	-0.144	144	-21.02	0	1	0	0	0	0	0	1520
tRF-49:70-chrM.Trp-TCA	ENSMUST00000018816.13	Copz2	Coding	Click Me	1	-0.368	140	-28.27	0	0	1	0	0	0	0	293
tRF-49:70-chrM.Trp-TCA	ENSMUST00000039118.6	Zic5	Coding	Click Me	1	-0.39	150	-20.2	0	0	0	0	1	0	0	2557
tRF-49:70-chrM.Trp-TCA	ENSMUST00000216566.2	Olfr1039	Coding	Click Me	1	-0.133	141	-28.1	1	0	0	0	0	0	0	2707
tRF-49:70-chrM.Trp-TCA	ENSMUST00000101800.5	Msrb1	Coding	Click Me	1	-0.126	141	-25.49	0	1	0	0	0	0	0	1358
tRF-49:70-chrM.Trp-TCA	ENSMUST00000146358.7	Tle2	Coding	Click Me	1	-0.186	143	-24.47	1	0	0	0	0	0	0	370
tRF-49:70-chrM.Trp-TCA	ENSMUST00000031598.10	Ddx54	Coding	Click Me	1	-0.188	142	-22.18	0	1	0	0	0	0	0	1307
tRF-49:70-chrM.Trp-TCA	ENSMUST00000102911.9	Slc44a1	Coding	Click Me	1	-0.223	167	-28.3	0	0	0	1	0	0	0	869
tRF-49:70-chrM.Trp-TCA	ENSMUST00000029485.5	1700013F07Rik	Coding	Click Me	1	-0.178	144	-22.8	0	1	0	0	0	0	0	3754
tRF-49:70-chrM.Trp-TCA	ENSMUST00000024816.12	Cmtr1	Coding	Click Me	1	-0.177	144	-30.11	0	1	0	0	0	0	0	3684
tRF-49:70-chrM.Trp-TCA	ENSMUST00000000696.6	Cd52	Coding	Click Me	1	-0.28	141	-26.55	0	0	1	0	0	0	0	911
tRF-49:70-chrM.Trp-TCA	ENSMUST00000035325.14	Qsox1	Coding	Click Me	1	-0.137	145	-20.11	0	0	0	0	0	1	0	5055
tRF-49:70-chrM.Trp-TCA	ENSMUST00000024829.6	Abcg1	Coding	Click Me	1	-0.159	143	-23.64	0	0	0	0	1	0	0	3724
tRF-49:70-chrM.Trp-TCA	ENSMUST00000001339.5	Rrp15	Coding	Click Me	1	-0.234	158	-28.7	0	0	0	0	0	1	0	5206
tRF-49:70-chrM.Trp-TCA	ENSMUST00000115740.8	Foxp3	Coding	Click Me	1	-0.298	154	-22.51	0	0	0	0	0	1	0	2200
tRF-49:70-chrM.Trp-TCA	ENSMUST00000069098.6	Soga1	Coding	Click Me	1	-0.23	154	-25.84	0	0	0	0	1	0	0	7915
tRF-49:70-chrM.Trp-TCA	ENSMUST00000024839.5	Sik1	Coding	Click Me	1	-0.22	154	-27.74	0	0	0	0	1	0	0	2037
tRF-49:70-chrM.Trp-TCA	ENSMUST00000107425.7	Aen	Coding	Click Me	2	-0.297	295	-53.33	0	0	1	0	0	1	0	3809
tRF-49:70-chrM.Trp-TCA	ENSMUST00000107717.7	Zfp652	Coding	Click Me	2	-0.367	288	-41.11	0	0	0	1	0	1	0	8294
tRF-49:70-chrM.Trp-TCA	ENSMUST00000003681.7	Sec14l2	Coding	Click Me	1	-0.179	141	-17.58	0	1	0	0	0	0	0	1266
tRF-49:70-chrM.Trp-TCA	ENSMUST00000143850.7	Derl2	Coding	Click Me	1	-0.23	142	-23.2	0	1	0	0	0	0	0	2883
tRF-49:70-chrM.Trp-TCA	ENSMUST00000207484.1	Picalm	Coding	Click Me	2	-0.287	292	-44.49	0	1	0	1	0	0	0	5868
tRF-49:70-chrM.Trp-TCA	ENSMUST00000073884.5	Nrg1	Coding	Click Me	1	-0.105	163	-26.51	0	0	0	0	0	1	0	8517
tRF-49:70-chrM.Trp-TCA	ENSMUST00000030464.13	Pik3r3	Coding	Click Me	1	-0.211	147	-27.34	0	0	0	0	1	0	0	3224
tRF-49:70-chrM.Trp-TCA	ENSMUST00000053699.12	Secisbp2l	Coding	Click Me	1	-0.124	173	-30.48	0	0	0	0	1	0	0	5178
tRF-49:70-chrM.Trp-TCA	ENSMUST00000037968.9	Uvrag	Coding	Click Me	2	-0.56	306	-44.91	0	0	0	0	1	1	0	2906
tRF-49:70-chrM.Trp-TCA	ENSMUST00000070375.7	Penk	Coding	Click Me	1	-0.263	147	-20.19	0	0	0	1	0	0	0	615
tRF-49:70-chrM.Trp-TCA	ENSMUST00000206720.1	Cbl	Coding	Click Me	1	-0.107	157	-30.06	0	0	0	0	1	0	0	8469
tRF-49:70-chrM.Trp-TCA	ENSMUST00000121995.1	Gm15821	Coding	Click Me	1	-0.251	158	-25.12	0	0	0	0	0	1	0	749
tRF-49:70-chrM.Trp-TCA	ENSMUST00000025830.7	Apba1	Coding	Click Me	1	-0.447	143	-24.89	0	0	0	0	1	0	0	3816
tRF-49:70-chrM.Trp-TCA	ENSMUST00000165413.8	Stk35	Coding	Click Me	1	-0.147	158	-24.31	0	0	0	1	0	0	0	4546
tRF-49:70-chrM.Trp-TCA	ENSMUST00000061327.1	Fbxo48	Coding	Click Me	1	-0.126	153	-23.68	0	0	0	0	1	0	0	4179
tRF-49:70-chrM.Trp-TCA	ENSMUST00000066554.12	Umodl1	Coding	Click Me	1	-0.147	142	-25.75	1	0	0	0	0	0	0	891
tRF-49:70-chrM.Trp-TCA	ENSMUST00000026225.14	Sema4g	Coding	Click Me	1	-0.218	155	-27.29	0	0	0	1	0	0	0	1400
tRF-49:70-chrM.Trp-TCA	ENSMUST00000081790.13	Cacul1	Coding	Click Me	2	-0.366	310	-48.06	0	0	0	0	2	0	0	5067
tRF-49:70-chrM.Trp-TCA	ENSMUST00000164782.9	Coch	Coding	Click Me	1	-0.347	153	-24.22	0	0	0	0	1	0	0	1510
tRF-49:70-chrM.Trp-TCA	ENSMUST00000052932.9	Pde12	Coding	Click Me	1	-0.13	144	-21.02	0	1	0	0	0	0	0	5567
tRF-49:70-chrM.Trp-TCA	ENSMUST00000164832.8	Dpy30	Coding	Click Me	1	-0.169	155	-21.47	0	0	0	0	0	1	0	2314
tRF-49:70-chrM.Trp-TCA	ENSMUST00000069651.12	Gadl1	Coding	Click Me	1	-0.157	150	-28.2	1	0	0	0	0	0	0	2063
tRF-49:70-chrM.Trp-TCA	ENSMUST00000166543.9	Ralbp1	Coding	Click Me	1	-0.251	148	-28.22	0	0	1	0	0	0	0	3853
tRF-49:70-chrM.Trp-TCA	ENSMUST00000003438.10	Mob3a	Coding	Click Me	1	-0.117	148	-26.17	0	1	0	0	0	0	0	3014
tRF-49:70-chrM.Trp-TCA	ENSMUST00000213259.1	Olfr1378	Coding	Click Me	1	-0.183	144	-20.21	0	0	0	1	0	0	0	3146
tRF-49:70-chrM.Trp-TCA	ENSMUST00000117462.1	Rhod	Coding	Click Me	1	-0.177	150	-21.04	0	1	0	0	0	0	0	4497
tRF-49:70-chrM.Trp-TCA	ENSMUST00000062306.6	Stpg2	Coding	Click Me	1	-0.184	157	-26.01	0	0	0	1	0	0	0	1125
tRF-49:70-chrM.Trp-TCA	ENSMUST00000171462.7	Nkapd1	Coding	Click Me	1	-0.117	141	-26.45	0	1	0	0	0	0	0	2188
tRF-49:70-chrM.Trp-TCA	ENSMUST00000023691.11	Il10rb	Coding	Click Me	1	-0.413	151	-23	0	0	0	0	1	0	0	2592
tRF-49:70-chrM.Trp-TCA	ENSMUST00000053913.12	Dgkq	Coding	Click Me	2	-0.406	287	-48.55	0	0	1	0	0	1	0	2033
tRF-49:70-chrM.Trp-TCA	ENSMUST00000075444.7	Ddn	Coding	Click Me	1	-0.388	140	-19.8	0	0	0	0	1	0	0	1501
tRF-49:70-chrM.Trp-TCA	ENSMUST00000027401.10	Stk16	Coding	Click Me	2	-0.339	305	-51.53	0	0	0	0	1	1	0	1658
tRF-49:70-chrM.Trp-TCA	ENSMUST00000028045.3	Mrc1	Coding	Click Me	1	-0.117	145	-25.92	0	1	0	0	0	0	0	2914
tRF-49:70-chrM.Trp-TCA	ENSMUST00000037434.12	Cacna2d4	Coding	Click Me	1	-0.352	163	-35.06	0	0	0	0	1	0	0	5109
tRF-49:70-chrM.Trp-TCA	ENSMUST00000051490.14	Idnk	Coding	Click Me	1	-0.221	144	-18.21	0	0	0	0	0	1	0	7151
tRF-49:70-chrM.Trp-TCA	ENSMUST00000120194.1	Fam104a	Coding	Click Me	1	-0.362	161	-32.57	0	0	0	0	1	0	0	2001
tRF-49:70-chrM.Trp-TCA	ENSMUST00000180353.1	Sox1	Coding	Click Me	2	-0.434	288	-43.43	0	0	1	1	0	0	0	2590
tRF-49:70-chrM.Trp-TCA	ENSMUST00000034802.14	Tent5a	Coding	Click Me	1	-0.157	140	-21.36	1	0	0	0	0	0	0	4019
tRF-49:70-chrM.Trp-TCA	ENSMUST00000020004.7	Asf1a	Coding	Click Me	1	-0.217	166	-24.99	0	0	0	0	0	1	0	3289
tRF-49:70-chrM.Trp-TCA	ENSMUST00000213840.1	Olfr623	Coding	Click Me	1	-0.187	144	-22.25	0	0	0	0	1	0	0	2598
tRF-49:70-chrM.Trp-TCA	ENSMUST00000109470.7	Mpped1	Coding	Click Me	1	-0.119	141	-24.69	0	1	0	0	0	0	0	2118
tRF-49:70-chrM.Trp-TCA	ENSMUST00000108846.1	Galnt10	Coding	Click Me	1	-0.173	152	-23.97	0	0	0	0	0	1	0	5230
tRF-49:70-chrM.Trp-TCA	ENSMUST00000117237.1	Qser1	Coding	Click Me	1	-0.282	152	-25.48	0	0	0	0	1	0	0	3674
tRF-49:70-chrM.Trp-TCA	ENSMUST00000032591.14	Zfp12	Coding	Click Me	1	-0.121	142	-24.56	1	0	0	0	0	0	0	2950
tRF-49:70-chrM.Trp-TCA	ENSMUST00000106223.3	Ndufaf8	Coding	Click Me	1	-0.2	140	-21.07	0	1	0	0	0	0	0	2820
tRF-49:70-chrM.Trp-TCA	ENSMUST00000107455.7	Rnf183	Coding	Click Me	1	-0.43	156	-21.16	0	0	0	0	1	0	0	3938
tRF-49:70-chrM.Trp-TCA	ENSMUST00000048691.5	Ptchd4	Coding	Click Me	1	-0.195	143	-28.94	0	1	0	0	0	0	0	17493
tRF-49:70-chrM.Trp-TCA	ENSMUST00000105111.3	F8a	Coding	Click Me	1	-0.245	141	-22.62	0	0	0	0	0	1	0	1334
tRF-49:70-chrM.Trp-TCA	ENSMUST00000034437.7	Wdr59	Coding	Click Me	2	-0.654	310	-46.35	0	0	0	1	1	0	0	1825
tRF-49:70-chrM.Trp-TCA	ENSMUST00000043774.10	Stpg3	Coding	Click Me	1	-0.123	140	-22.08	1	0	0	0	0	0	0	832
tRF-49:70-chrM.Trp-TCA	ENSMUST00000093923.8	Cdc27	Coding	Click Me	1	-0.114	148	-26.4	0	0	1	0	0	0	0	3085
tRF-49:70-chrM.Trp-TCA	ENSMUST00000028607.12	Caprin1	Coding	Click Me	1	-0.164	164	-27.01	0	0	0	1	0	0	0	3858
tRF-49:70-chrM.Trp-TCA	ENSMUST00000066708.6	Dmp1	Coding	Click Me	1	-0.28	153	-27.1	0	0	0	1	0	0	0	1135
tRF-49:70-chrM.Trp-TCA	ENSMUST00000100127.8	Gtdc1	Coding	Click Me	1	-0.174	144	-21.77	0	1	0	0	0	0	0	1956
tRF-49:70-chrM.Trp-TCA	ENSMUST00000166219.1	Hsbp1l1	Coding	Click Me	1	-0.176	144	-21.02	0	1	0	0	0	0	0	808
tRF-49:70-chrM.Trp-TCA	ENSMUST00000064701.7	B4galt7	Coding	Click Me	1	-0.208	153	-26.33	0	0	0	1	0	0	0	1068
tRF-49:70-chrM.Trp-TCA	ENSMUST00000093362.11	Urgcp	Coding	Click Me	1	-0.166	146	-25.61	0	1	0	0	0	0	0	4622
tRF-49:70-chrM.Trp-TCA	ENSMUST00000159715.7	Galnt6	Coding	Click Me	1	-0.16	145	-23.41	0	0	0	0	0	1	0	3439
tRF-49:70-chrM.Trp-TCA	ENSMUST00000021682.8	Angel1	Coding	Click Me	1	-0.235	145	-16.64	0	0	0	0	0	1	0	1779
tRF-49:70-chrM.Trp-TCA	ENSMUST00000226264.1	Vmn1r90	Coding	Click Me	1	-0.186	144	-21.77	0	0	0	0	1	0	0	5768
tRF-49:70-chrM.Trp-TCA	ENSMUST00000074619.5	Xlr3a	Coding	Click Me	1	-0.207	147	-24.84	1	0	0	0	0	0	0	833
tRF-49:70-chrM.Trp-TCA	ENSMUST00000066981.11	Umodl1	Coding	Click Me	1	-0.147	142	-25.75	1	0	0	0	0	0	0	891
tRF-49:70-chrM.Trp-TCA	ENSMUST00000027393.7	Bard1	Coding	Click Me	1	-0.267	140	-26.28	0	0	1	0	0	0	0	3050
tRF-49:70-chrM.Trp-TCA	ENSMUST00000037235.6	Xkr7	Coding	Click Me	1	-0.182	149	-21.92	0	0	0	1	0	0	0	5319
tRF-49:70-chrM.Trp-TCA	ENSMUST00000100294.2	Gm10837	Coding	Click Me	1	-0.311	140	-25.82	0	0	1	0	0	0	0	970
tRF-49:70-chrM.Trp-TCA	ENSMUST00000046186.7	Spon2	Coding	Click Me	1	-0.346	143	-23.78	0	0	1	0	0	0	0	952
tRF-49:70-chrM.Trp-TCA	ENSMUST00000140364.7	Adck2	Coding	Click Me	1	-0.238	160	-26.86	0	0	0	0	1	0	0	4767
tRF-49:70-chrM.Trp-TCA	ENSMUST00000065997.4	Aplf	Coding	Click Me	2	-0.302	293	-50.14	0	0	1	0	0	1	0	3769
tRF-49:70-chrM.Trp-TCA	ENSMUST00000170816.1	Gm3625	Coding	Click Me	1	-0.246	149	-20.06	0	0	0	1	0	0	0	3031
tRF-49:70-chrM.Trp-TCA	ENSMUST00000091257.10	Mfn1	Coding	Click Me	1	-0.196	150	-21.74	0	0	0	1	0	0	0	4159
tRF-49:70-chrM.Trp-TCA	ENSMUST00000070084.9	Ticam2	Coding	Click Me	2	-0.407	292	-39.46	0	0	0	1	1	0	0	3543
tRF-49:70-chrM.Trp-TCA	ENSMUST00000030702.13	Ppp1r8	Coding	Click Me	1	-0.238	151	-19.81	0	0	0	1	0	0	0	1041
tRF-49:70-chrM.Trp-TCA	ENSMUST00000108777.9	Jmjd4	Coding	Click Me	1	-0.312	141	-18.94	0	0	0	0	1	0	0	4826
tRF-49:70-chrM.Trp-TCA	ENSMUST00000094287.9	Ctcfl	Coding	Click Me	1	-0.176	147	-24.48	0	1	0	0	0	0	0	1804
tRF-49:70-chrM.Trp-TCA	ENSMUST00000152227.7	Desi1	Coding	Click Me	1	-0.246	143	-27.14	0	1	0	0	0	0	0	2234
tRF-49:70-chrM.Trp-TCA	ENSMUST00000035351.6	Syt15	Coding	Click Me	1	-0.142	162	-31.32	0	0	0	0	1	0	0	4586
tRF-49:70-chrM.Trp-TCA	ENSMUST00000120095.7	Wdr31	Coding	Click Me	1	-0.225	144	-19.29	0	1	0	0	0	0	0	1145
tRF-49:70-chrM.Trp-TCA	ENSMUST00000010044.7	Wnt3a	Coding	Click Me	1	-0.132	141	-25.43	0	1	0	0	0	0	0	1597
tRF-49:70-chrM.Trp-TCA	ENSMUST00000110242.7	Ints10	Coding	Click Me	1	-0.243	152	-21.36	0	0	0	1	0	0	0	1975
tRF-49:70-chrM.Trp-TCA	ENSMUST00000036572.3	Tmem51	Coding	Click Me	1	-0.152	145	-18.05	0	1	0	0	0	0	0	3285
tRF-49:70-chrM.Trp-TCA	ENSMUST00000114366.2	Aox2	Coding	Click Me	1	-0.129	148	-23.01	0	0	0	0	0	1	0	1640
tRF-49:70-chrM.Trp-TCA	ENSMUST00000122103.7	Rab11fip3	Coding	Click Me	1	-0.193	166	-25.73	0	0	0	1	0	0	0	1736
tRF-49:70-chrM.Trp-TCA	ENSMUST00000211115.1	Casp3	Coding	Click Me	1	-0.154	142	-21.48	0	1	0	0	0	0	0	1541
tRF-49:70-chrM.Trp-TCA	ENSMUST00000073043.4	Cxcl12	Coding	Click Me	2	-0.272	300	-47.01	0	1	0	1	0	0	0	5200
tRF-49:70-chrM.Trp-TCA	ENSMUST00000031536.7	Mrm2	Coding	Click Me	1	-0.117	146	-21.02	0	1	0	0	0	0	0	3463
tRF-49:70-chrM.Trp-TCA	ENSMUST00000024704.9	Flywch2	Coding	Click Me	1	-0.148	161	-25.12	0	0	0	0	1	0	0	4698
tRF-49:70-chrM.Trp-TCA	ENSMUST00000053922.11	Vwc2l	Coding	Click Me	1	-0.14	162	-19.02	0	0	0	0	0	1	0	3182
tRF-49:70-chrM.Trp-TCA	ENSMUST00000059826.9	Kcnb1	Coding	Click Me	2	-0.497	334	-60.35	0	0	0	0	1	1	0	8384
tRF-49:70-chrM.Trp-TCA	ENSMUST00000030434.4	Fuca1	Coding	Click Me	2	-0.335	304	-40.13	0	1	0	1	0	0	0	3126
tRF-49:70-chrM.Trp-TCA	ENSMUST00000109443.7	Ptprt	Coding	Click Me	1	-0.114	171	-35.15	0	0	0	1	0	0	0	7526
tRF-49:70-chrM.Trp-TCA	ENSMUST00000028299.10	1700019N19Rik	Coding	Click Me	1	-0.144	149	-25.92	0	0	0	0	1	0	0	4615
tRF-49:70-chrM.Trp-TCA	ENSMUST00000005817.8	Tomm40l	Coding	Click Me	2	-0.37	293	-47.47	0	1	0	0	1	0	0	3510
tRF-49:70-chrM.Trp-TCA	ENSMUST00000063694.9	Klf13	Coding	Click Me	1	-0.141	159	-27.5	0	0	0	0	1	0	0	5173
tRF-49:70-chrM.Trp-TCA	ENSMUST00000225153.1	Sorbs1	Coding	Click Me	1	-0.215	140	-22.23	1	0	0	0	0	0	0	278
tRF-49:70-chrM.Trp-TCA	ENSMUST00000019071.3	Ccl6	Coding	Click Me	1	-0.289	157	-19.78	0	0	0	0	1	0	0	3855
tRF-49:70-chrM.Trp-TCA	ENSMUST00000097773.3	Klhl21	Coding	Click Me	1	-0.175	142	-28.75	1	0	0	0	0	0	0	2058
tRF-49:70-chrM.Trp-TCA	ENSMUST00000033611.4	Xkrx	Coding	Click Me	1	-0.142	142	-23.71	1	0	0	0	0	0	0	1514
tRF-49:70-chrM.Trp-TCA	ENSMUST00000137035.7	St3gal6	Coding	Click Me	1	-0.164	140	-22.75	0	1	0	0	0	0	0	4590
tRF-49:70-chrM.Trp-TCA	ENSMUST00000118545.7	Sh3bp2	Coding	Click Me	1	-0.223	147	-22.21	0	0	0	0	0	1	0	1129
tRF-49:70-chrM.Trp-TCA	ENSMUST00000164826.7	Card10	Coding	Click Me	1	-0.114	140	-27.53	0	1	0	0	0	0	0	1471
tRF-49:70-chrM.Trp-TCA	ENSMUST00000063140.14	Hcrtr2	Coding	Click Me	1	-0.304	155	-18.14	0	0	0	0	1	0	0	2972
tRF-49:70-chrM.Trp-TCA	ENSMUST00000036570.4	Appl1	Coding	Click Me	1	-0.141	144	-21.02	0	1	0	0	0	0	0	5937
tRF-49:70-chrM.Trp-TCA	ENSMUST00000113466.1	Fgd5	Coding	Click Me	1	-0.145	154	-22	0	0	0	1	0	0	0	1398
tRF-49:70-chrM.Trp-TCA	ENSMUST00000025522.10	Pdgfrb	Coding	Click Me	2	-0.633	289	-52.9	0	0	1	0	0	1	0	4293
tRF-49:70-chrM.Trp-TCA	ENSMUST00000006704.16	Itih1	Coding	Click Me	2	-0.326	309	-43.7	0	0	0	2	0	0	0	3318
tRF-49:70-chrM.Trp-TCA	ENSMUST00000216195.1	Olfr733	Coding	Click Me	1	-0.215	144	-19.07	0	1	0	0	0	0	0	2490
tRF-49:70-chrM.Trp-TCA	ENSMUST00000031554.8	Tmem168	Coding	Click Me	1	-0.118	144	-26.65	1	0	0	0	0	0	0	2155
tRF-49:70-chrM.Trp-TCA	ENSMUST00000109445.8	Ptprt	Coding	Click Me	1	-0.113	171	-35.15	0	0	0	1	0	0	0	7528
tRF-49:70-chrM.Trp-TCA	ENSMUST00000165147.2	Muc5b	Coding	Click Me	1	-0.419	152	-27.69	0	0	0	0	1	0	0	541
tRF-49:70-chrM.Trp-TCA	ENSMUST00000120303.8	Olfr1	Coding	Click Me	1	-0.153	153	-20.26	0	0	0	1	0	0	0	2066
tRF-49:70-chrM.Trp-TCA	ENSMUST00000058464.4	Serpina9	Coding	Click Me	1	-0.148	154	-25.29	0	0	0	1	0	0	0	3445
tRF-49:70-chrM.Trp-TCA	ENSMUST00000189808.6	Gstp3	Coding	Click Me	1	-0.219	144	-21.02	0	1	0	0	0	0	0	1497
tRF-49:70-chrM.Trp-TCA	ENSMUST00000040790.13	Slx4	Coding	Click Me	1	-0.148	157	-25.94	0	0	0	0	0	1	0	715
tRF-49:70-chrM.Trp-TCA	ENSMUST00000042190.13	Tecta	Coding	Click Me	1	-0.329	146	-26.81	0	0	1	0	0	0	0	603
tRF-49:70-chrM.Trp-TCA	ENSMUST00000022782.9	Lrp10	Coding	Click Me	1	-0.147	146	-22.44	1	0	0	0	0	0	0	1653
tRF-49:70-chrM.Trp-TCA	ENSMUST00000135338.2	Susd5	Coding	Click Me	1	-0.16	157	-25.09	0	0	0	1	0	0	0	1823
tRF-49:70-chrM.Trp-TCA	ENSMUST00000028780.3	Chac1	Coding	Click Me	1	-0.169	141	-24.97	0	1	0	0	0	0	0	794
tRF-49:70-chrM.Trp-TCA	ENSMUST00000183663.7	Il6st	Coding	Click Me	1	-0.307	158	-27.48	0	0	0	0	1	0	0	8166
tRF-49:70-chrM.Trp-TCA	ENSMUST00000075164.10	Kif21b	Coding	Click Me	2	-0.38	292	-48.27	0	1	0	0	1	0	0	5320
tRF-49:70-chrM.Trp-TCA	ENSMUST00000112380.8	Phka2	Coding	Click Me	1	-0.188	148	-23.33	0	0	0	0	0	1	0	5220
tRF-49:70-chrM.Trp-TCA	ENSMUST00000031838.8	Igf2bp3	Coding	Click Me	1	-0.101	145	-21.04	0	0	0	1	0	0	0	2150
tRF-49:70-chrM.Trp-TCA	ENSMUST00000178700.7	Gpr161	Coding	Click Me	1	-0.107	145	-28.93	0	1	0	0	0	0	0	5065
tRF-49:70-chrM.Trp-TCA	ENSMUST00000071585.9	Oprl1	Coding	Click Me	1	-0.23	143	-22.87	0	0	0	0	0	1	0	1648
tRF-49:70-chrM.Trp-TCA	ENSMUST00000065630.7	Ddx10	Coding	Click Me	1	-0.154	142	-26.17	0	0	1	0	0	0	0	4603
tRF-49:70-chrM.Trp-TCA	ENSMUST00000175726.7	9930021J03Rik	Coding	Click Me	1	-0.206	142	-26.12	0	1	0	0	0	0	0	1606
tRF-49:70-chrM.Trp-TCA	ENSMUST00000096338.3	Gpr152	Coding	Click Me	1	-0.189	152	-27.38	0	1	0	0	0	0	0	1743
tRF-49:70-chrM.Trp-TCA	ENSMUST00000053175.12	Vstm4	Coding	Click Me	1	-0.218	162	-25.52	0	0	0	1	0	0	0	1627
tRF-49:70-chrM.Trp-TCA	ENSMUST00000042646.7	Atoh8	Coding	Click Me	1	-0.192	142	-20.81	0	0	0	1	0	0	0	973
tRF-49:70-chrM.Trp-TCA	ENSMUST00000076270.12	Rabep1	Coding	Click Me	1	-0.19	154	-26.55	0	0	0	1	0	0	0	2747
tRF-49:70-chrM.Trp-TCA	ENSMUST00000113889.8	Gtf3c5	Coding	Click Me	1	-0.188	145	-21.89	0	0	0	0	0	1	0	958
tRF-49:70-chrM.Trp-TCA	ENSMUST00000044895.12	Rcan2	Coding	Click Me	1	-0.226	161	-23.14	0	0	0	1	0	0	0	2383
tRF-49:70-chrM.Trp-TCA	ENSMUST00000050004.2	Rnf125	Coding	Click Me	2	-0.356	300	-43.97	0	1	0	1	0	0	0	4191
tRF-49:70-chrM.Trp-TCA	ENSMUST00000172753.1	Hspa1b	Coding	Click Me	1	-0.315	150	-25.8	0	0	0	1	0	0	0	5336
tRF-49:70-chrM.Trp-TCA	ENSMUST00000079597.6	Paqr9	Coding	Click Me	1	-0.14	152	-28.18	0	0	0	1	0	0	0	6980
tRF-49:70-chrM.Trp-TCA	ENSMUST00000049248.5	Malt1	Coding	Click Me	1	-0.24	143	-20.8	0	1	0	0	0	0	0	3024
tRF-49:70-chrM.Trp-TCA	ENSMUST00000169922.8	Chd2	Coding	Click Me	1	-0.2	153	-20.6	0	0	0	1	0	0	0	3263
tRF-49:70-chrM.Trp-TCA	ENSMUST00000000939.14	Hip1r	Coding	Click Me	2	-0.653	300	-52.79	0	0	1	0	1	0	0	3772
tRF-49:70-chrM.Trp-TCA	ENSMUST00000113897.8	Apoo	Coding	Click Me	1	-0.131	140	-23.25	0	0	1	0	0	0	0	3387
tRF-49:70-chrM.Trp-TCA	ENSMUST00000025515.6	Tmx3	Coding	Click Me	1	-0.147	140	-20.89	0	1	0	0	0	0	0	3417
tRF-49:70-chrM.Trp-TCA	ENSMUST00000103225.10	5730455P16Rik	Coding	Click Me	1	-0.2	144	-21.02	0	1	0	0	0	0	0	3319
tRF-49:70-chrM.Trp-TCA	ENSMUST00000046404.7	Ubr7	Coding	Click Me	1	-0.147	145	-24.63	1	0	0	0	0	0	0	1919
tRF-49:70-chrM.Trp-TCA	ENSMUST00000204087.1	Rab11fip5	Coding	Click Me	2	-0.387	311	-49.25	0	1	0	1	0	0	0	2056
tRF-49:70-chrM.Trp-TCA	ENSMUST00000156722.1	Rasal1	Coding	Click Me	1	-0.194	141	-20.19	0	1	0	0	0	0	0	569
tRF-49:70-chrM.Trp-TCA	ENSMUST00000228098.1	Vmn1r71	Coding	Click Me	1	-0.192	147	-23.01	1	0	0	0	0	0	0	3293
tRF-49:70-chrM.Trp-TCA	ENSMUST00000067545.7	Lclat1	Coding	Click Me	1	-0.25	156	-31.66	0	0	0	0	1	0	0	3783
tRF-49:70-chrM.Trp-TCA	ENSMUST00000034285.13	Cotl1	Coding	Click Me	3	-0.732	457	-82.93	0	2	0	0	1	0	0	1031
tRF-49:70-chrM.Trp-TCA	ENSMUST00000094028.9	Capza1	Coding	Click Me	1	-0.182	168	-29.07	0	0	0	0	0	1	0	2208
tRF-49:70-chrM.Trp-TCA	ENSMUST00000033160.14	Gga2	Coding	Click Me	1	-0.124	148	-22.34	0	1	0	0	0	0	0	2982
tRF-49:70-chrM.Trp-TCA	ENSMUST00000021297.5	Lsm12	Coding	Click Me	1	-0.163	141	-26.16	0	1	0	0	0	0	0	1578
tRF-49:70-chrM.Trp-TCA	ENSMUST00000106052.1	Zfp941	Coding	Click Me	1	-0.139	144	-21.02	0	1	0	0	0	0	0	1752
tRF-49:70-chrM.Trp-TCA	ENSMUST00000028855.13	Prom2	Coding	Click Me	1	-0.276	154	-28.03	0	0	0	0	1	0	0	2141
tRF-49:70-chrM.Trp-TCA	ENSMUST00000103143.9	Fbxl20	Coding	Click Me	1	-0.184	161	-28.44	0	0	0	0	1	0	0	7037
tRF-49:70-chrM.Trp-TCA	ENSMUST00000208577.1	Frmpd2	Coding	Click Me	1	-0.166	143	-24.45	1	0	0	0	0	0	0	1013
tRF-49:70-chrM.Trp-TCA	ENSMUST00000078847.12	Tom1	Coding	Click Me	1	-0.175	144	-21.02	0	1	0	0	0	0	0	4880
tRF-49:70-chrM.Trp-TCA	ENSMUST00000092295.9	Mbd3	Coding	Click Me	1	-0.122	143	-22.74	0	1	0	0	0	0	0	2021
tRF-49:70-chrM.Trp-TCA	ENSMUST00000078404.14	Pcbp2	Coding	Click Me	1	-0.139	140	-27.04	0	1	0	0	0	0	0	1536
tRF-49:70-chrM.Trp-TCA	ENSMUST00000022009.9	Cetn3	Coding	Click Me	1	-0.19	150	-24.14	0	0	0	1	0	0	0	5170
tRF-49:70-chrM.Trp-TCA	ENSMUST00000026828.5	Mcrip2	Coding	Click Me	1	-0.149	143	-23.86	0	1	0	0	0	0	0	835
tRF-49:70-chrM.Trp-TCA	ENSMUST00000111587.9	Diablo	Coding	Click Me	1	-0.374	168	-32.66	0	0	0	0	1	0	0	1181
tRF-49:70-chrM.Trp-TCA	ENSMUST00000021416.8	Mbip	Coding	Click Me	1	-0.102	147	-21.46	0	0	0	0	0	1	0	2959
tRF-49:70-chrM.Trp-TCA	ENSMUST00000112393.8	Pm20d1	Coding	Click Me	1	-0.431	153	-29.75	0	0	0	0	1	0	0	5365
tRF-49:70-chrM.Trp-TCA	ENSMUST00000106847.8	Trim34b	Coding	Click Me	1	-0.208	145	-19.95	0	1	0	0	0	0	0	1922
tRF-49:70-chrM.Trp-TCA	ENSMUST00000080885.11	Dbp	Coding	Click Me	1	-0.192	143	-24.57	0	1	0	0	0	0	0	343
tRF-49:70-chrM.Trp-TCA	ENSMUST00000102998.3	Nkain3	Coding	Click Me	1	-0.216	157	-23.99	0	0	0	1	0	0	0	2046
tRF-49:70-chrM.Trp-TCA	ENSMUST00000004965.7	Chmp2b	Coding	Click Me	1	-0.215	151	-22.29	0	0	0	1	0	0	0	1556
tRF-49:70-chrM.Trp-TCA	ENSMUST00000014118.3	Mcemp1	Coding	Click Me	1	-0.255	150	-23.63	0	0	0	1	0	0	0	4616
tRF-49:70-chrM.Trp-TCA	ENSMUST00000091526.3	Rslcan18	Coding	Click Me	1	-0.286	145	-18.43	0	0	0	1	0	0	0	1552
tRF-49:70-chrM.Trp-TCA	ENSMUST00000085592.5	4931406P16Rik	Coding	Click Me	1	-0.129	147	-26.18	0	0	0	1	0	0	0	2215
tRF-49:70-chrM.Trp-TCA	ENSMUST00000121652.7	Orai1	Coding	Click Me	1	-0.1	144	-22.34	0	1	0	0	0	0	0	4485
tRF-49:70-chrM.Trp-TCA	ENSMUST00000073534.9	Zfp523	Coding	Click Me	2	-0.632	365	-82.48	0	0	0	1	1	0	0	677
tRF-49:70-chrM.Trp-TCA	ENSMUST00000065253.12	Acot11	Coding	Click Me	1	-0.286	146	-25.8	0	0	1	0	0	0	0	1094
tRF-49:70-chrM.Trp-TCA	ENSMUST00000103037.4	Ush1g	Coding	Click Me	1	-0.144	152	-22.65	0	0	0	1	0	0	0	1735
tRF-49:70-chrM.Trp-TCA	ENSMUST00000028617.6	Api5	Coding	Click Me	1	-0.182	154	-20.88	0	0	0	1	0	0	0	2077
tRF-49:70-chrM.Trp-TCA	ENSMUST00000159027.7	Ppp3cb	Coding	Click Me	1	-0.131	157	-24.2	0	0	0	0	0	1	0	3148
tRF-49:70-chrM.Trp-TCA	ENSMUST00000046361.4	BC030499	Coding	Click Me	1	-0.228	144	-19.07	0	1	0	0	0	0	0	1679
tRF-49:70-chrM.Trp-TCA	ENSMUST00000139783.1	Fam19a3	Coding	Click Me	1	-0.164	152	-28.11	0	1	0	0	0	0	0	3341
tRF-49:70-chrM.Trp-TCA	ENSMUST00000070953.10	Pank4	Coding	Click Me	1	-0.416	154	-23.71	0	0	0	0	1	0	0	238
tRF-49:70-chrM.Trp-TCA	ENSMUST00000076091.3	Ctf2	Coding	Click Me	1	-0.16	144	-19.07	0	1	0	0	0	0	0	1105
tRF-49:70-chrM.Trp-TCA	ENSMUST00000032761.7	Pex11a	Coding	Click Me	1	-0.203	161	-24.56	0	0	0	1	0	0	0	2839
tRF-49:70-chrM.Trp-TCA	ENSMUST00000006618.8	Arhgef19	Coding	Click Me	1	-0.185	152	-25.55	0	0	0	1	0	0	0	1243
tRF-49:70-chrM.Trp-TCA	ENSMUST00000062015.14	Stard13	Coding	Click Me	1	-0.133	151	-22.66	0	0	0	0	0	1	0	2027
tRF-49:70-chrM.Trp-TCA	ENSMUST00000051117.2	Gm6583	Coding	Click Me	1	-0.204	151	-24.33	0	0	0	1	0	0	0	654
tRF-49:70-chrM.Trp-TCA	ENSMUST00000003622.15	Slc25a1	Coding	Click Me	1	-0.181	145	-19.58	0	0	0	0	1	0	0	4349
tRF-49:70-chrM.Trp-TCA	ENSMUST00000029748.7	Fcgr1	Coding	Click Me	1	-0.435	153	-21.16	0	0	0	0	1	0	0	1372
tRF-49:70-chrM.Trp-TCA	ENSMUST00000006818.3	Tcf23	Coding	Click Me	1	-0.107	148	-22.72	0	0	0	1	0	0	0	3369
tRF-49:70-chrM.Trp-TCA	ENSMUST00000031398.13	Hpd	Coding	Click Me	2	-0.386	309	-53.83	0	1	0	0	1	0	0	4183
tRF-49:70-chrM.Trp-TCA	ENSMUST00000027499.12	Bok	Coding	Click Me	1	-0.351	143	-26.16	0	0	1	0	0	0	0	617
tRF-49:70-chrM.Trp-TCA	ENSMUST00000203724.2	Add2	Coding	Click Me	1	-0.235	152	-28.38	0	0	0	1	0	0	0	774
tRF-49:70-chrM.Trp-TCA	ENSMUST00000023282.8	Miox	Coding	Click Me	1	-0.204	140	-19.28	0	1	0	0	0	0	0	1603
tRF-49:70-chrM.Trp-TCA	ENSMUST00000027495.14	Sept2	Coding	Click Me	1	-0.105	141	-24.45	1	0	0	0	0	0	0	2570
tRF-49:70-chrM.Trp-TCA	ENSMUST00000095760.2	Lsmem1	Coding	Click Me	1	-0.233	148	-22.94	0	0	0	1	0	0	0	3049
tRF-49:70-chrM.Trp-TCA	ENSMUST00000217733.1	Myl6	Coding	Click Me	1	-0.344	143	-27.68	0	0	0	0	1	0	0	1166
tRF-49:70-chrM.Trp-TCA	ENSMUST00000041555.9	Mvb12b	Coding	Click Me	1	-0.217	150	-27.5	0	0	0	0	1	0	0	3494
tRF-49:70-chrM.Trp-TCA	ENSMUST00000152703.1	Tnfrsf23	Coding	Click Me	1	-0.158	147	-21.54	0	0	0	1	0	0	0	2736
tRF-49:70-chrM.Trp-TCA	ENSMUST00000091291.4	Insr	Coding	Click Me	1	-0.103	140	-19.56	0	0	1	0	0	0	0	4751
tRF-49:70-chrM.Trp-TCA	ENSMUST00000056336.1	Oprd1	Coding	Click Me	2	-0.334	295	-43.18	0	0	0	0	2	0	0	8499
tRF-49:70-chrM.Trp-TCA	ENSMUST00000049506.7	Zrsr1	Coding	Click Me	1	-0.178	147	-23.82	0	0	0	1	0	0	0	3015
tRF-49:70-chrM.Trp-TCA	ENSMUST00000066936.8	Gpsm1	Coding	Click Me	1	-0.147	142	-24.21	0	1	0	0	0	0	0	1239
tRF-49:70-chrM.Trp-TCA	ENSMUST00000027682.8	Gpr37l1	Coding	Click Me	1	-0.207	150	-29.49	0	1	0	0	0	0	0	646
tRF-49:70-chrM.Trp-TCA	ENSMUST00000154473.8	AI413582	Coding	Click Me	1	-0.479	152	-22.5	0	0	0	0	1	0	0	376
tRF-49:70-chrM.Trp-TCA	ENSMUST00000086281.4	Zfp599	Coding	Click Me	1	-0.213	149	-32.22	0	0	0	0	1	0	0	5058
tRF-49:70-chrM.Trp-TCA	ENSMUST00000226873.1	Styx	Coding	Click Me	1	-0.2	148	-25.26	0	1	0	0	0	0	0	11922
tRF-49:70-chrM.Trp-TCA	ENSMUST00000086228.2	Vmn1r84	Coding	Click Me	1	-0.156	144	-21.02	0	1	0	0	0	0	0	1495
tRF-49:70-chrM.Trp-TCA	ENSMUST00000004985.10	Brpf3	Coding	Click Me	2	-0.461	282	-46.04	0	1	1	0	0	0	0	2096
tRF-49:70-chrM.Trp-TCA	ENSMUST00000059193.6	F2r	Coding	Click Me	2	-0.334	306	-58.37	0	0	1	0	0	1	0	2862
tRF-49:70-chrM.Trp-TCA	ENSMUST00000116341.3	Slc25a51	Coding	Click Me	1	-0.216	145	-18.14	0	0	0	0	1	0	0	3318
tRF-49:70-chrM.Trp-TCA	ENSMUST00000112616.7	Galnt5	Coding	Click Me	1	-0.119	158	-22.22	0	0	0	0	0	1	0	2444
tRF-49:70-chrM.Trp-TCA	ENSMUST00000137170.2	Lin52	Coding	Click Me	3	-0.494	444	-64.43	0	0	0	1	1	1	0	3764
tRF-49:70-chrM.Trp-TCA	ENSMUST00000043722.9	Lgals3bp	Coding	Click Me	1	-0.134	146	-21.39	0	1	0	0	0	0	0	2907
tRF-49:70-chrM.Trp-TCA	ENSMUST00000113753.7	Tprkb	Coding	Click Me	1	-0.194	144	-21.02	0	1	0	0	0	0	0	1422
tRF-49:70-chrM.Trp-TCA	ENSMUST00000215138.2	Olfr52	Coding	Click Me	1	-0.159	144	-21.02	0	1	0	0	0	0	0	1738
tRF-49:70-chrM.Trp-TCA	ENSMUST00000072177.13	Nuak2	Coding	Click Me	1	-0.226	164	-28.3	0	0	0	0	0	1	0	912
tRF-49:70-chrM.Trp-TCA	ENSMUST00000054665.9	Ankrd23	Coding	Click Me	1	-0.153	156	-25.81	0	1	0	0	0	0	0	2327
tRF-49:70-chrM.Trp-TCA	ENSMUST00000224011.1	Rnf180	Coding	Click Me	1	-0.125	152	-26.08	0	0	0	1	0	0	0	1858
tRF-49:70-chrM.Trp-TCA	ENSMUST00000159124.7	Impdh1	Coding	Click Me	1	-0.149	140	-26.83	0	1	0	0	0	0	0	761
tRF-49:70-chrM.Trp-TCA	ENSMUST00000029454.11	Casq2	Coding	Click Me	1	-0.137	156	-23.85	0	0	0	1	0	0	0	3560
tRF-49:70-chrM.Trp-TCA	ENSMUST00000029325.4	Aadac	Coding	Click Me	1	-0.293	141	-18.31	0	0	0	0	0	1	0	4334
tRF-49:70-chrM.Trp-TCA	ENSMUST00000168230.2	Vmn2r70	Coding	Click Me	2	-0.405	316	-45	0	0	0	0	1	1	0	10296
tRF-49:70-chrM.Trp-TCA	ENSMUST00000022705.6	Med4	Coding	Click Me	1	-0.197	163	-28.89	0	0	0	0	0	1	0	790
tRF-49:70-chrM.Trp-TCA	ENSMUST00000177005.7	Glmp	Coding	Click Me	1	-0.197	143	-25.55	0	1	0	0	0	0	0	2945
tRF-49:70-chrM.Trp-TCA	ENSMUST00000114700.8	Agbl5	Coding	Click Me	1	-0.203	157	-26.15	0	0	0	1	0	0	0	633
tRF-49:70-chrM.Trp-TCA	ENSMUST00000030865.8	Agtrap	Coding	Click Me	1	-0.289	155	-22.16	0	0	0	0	1	0	0	4757
tRF-49:70-chrM.Trp-TCA	ENSMUST00000029784.9	Celf3	Coding	Click Me	1	-0.228	176	-30.05	0	0	0	1	0	0	0	1075
tRF-49:70-chrM.Trp-TCA	ENSMUST00000053959.6	Ints6	Coding	Click Me	2	-0.373	288	-54.16	0	2	0	0	0	0	0	1895
tRF-49:70-chrM.Trp-TCA	ENSMUST00000041003.7	Tfb1m	Coding	Click Me	1	-0.159	161	-29.53	0	0	0	1	0	0	0	754
tRF-49:70-chrM.Trp-TCA	ENSMUST00000177585.8	Ulbp1	Coding	Click Me	2	-0.438	309	-53.92	0	0	0	2	0	0	0	678
tRF-49:70-chrM.Trp-TCA	ENSMUST00000019677.11	Mknk1	Coding	Click Me	1	-0.132	144	-19.2	0	0	0	1	0	0	0	2378
tRF-49:70-chrM.Trp-TCA	ENSMUST00000098758.3	I830077J02Rik	Coding	Click Me	1	-0.391	154	-21.94	0	0	0	0	1	0	0	2203
tRF-49:70-chrM.Trp-TCA	ENSMUST00000081775.11	Nfe2l1	Coding	Click Me	1	-0.42	148	-28.52	0	0	1	0	0	0	0	1762
tRF-49:70-chrM.Trp-TCA	ENSMUST00000039750.6	Lgi2	Coding	Click Me	1	-0.513	144	-20.08	0	0	0	0	1	0	0	4670
tRF-49:70-chrM.Trp-TCA	ENSMUST00000025477.13	St8sia3	Coding	Click Me	1	-0.359	153	-21.46	0	0	0	0	1	0	0	4350
tRF-49:70-chrM.Trp-TCA	ENSMUST00000107942.8	Atp8b5	Coding	Click Me	1	-0.281	143	-18.5	0	0	0	0	0	1	0	822
tRF-49:70-chrM.Trp-TCA	ENSMUST00000215511.1	Olfr988	Coding	Click Me	1	-0.414	161	-27.43	0	0	0	0	1	0	0	567
tRF-49:70-chrM.Trp-TCA	ENSMUST00000207405.1	Dnajb13	Coding	Click Me	1	-0.205	146	-19.33	0	1	0	0	0	0	0	1441
tRF-49:70-chrM.Trp-TCA	ENSMUST00000111915.7	Fam234b	Coding	Click Me	1	-0.11	140	-18.44	0	0	0	1	0	0	0	2260
tRF-49:70-chrM.Trp-TCA	ENSMUST00000098585.3	E130208F15Rik	Coding	Click Me	2	-0.296	282	-41.45	1	1	0	0	0	0	0	1546
tRF-49:70-chrM.Trp-TCA	ENSMUST00000217280.1	Olfr859	Coding	Click Me	1	-0.142	149	-23.55	0	0	0	0	1	0	0	8377
tRF-49:70-chrM.Trp-TCA	ENSMUST00000034203.16	Cog4	Coding	Click Me	1	-0.187	148	-24.84	0	0	0	1	0	0	0	819
tRF-49:70-chrM.Trp-TCA	ENSMUST00000043707.6	Rhbdd2	Coding	Click Me	2	-0.261	293	-39.41	0	1	0	0	1	0	0	4884
tRF-49:70-chrM.Trp-TCA	ENSMUST00000105993.3	Nkain1	Coding	Click Me	1	-0.232	157	-24.12	0	0	0	0	0	1	0	2031
tRF-49:70-chrM.Trp-TCA	ENSMUST00000056660.12	Tmem229b	Coding	Click Me	1	-0.113	140	-24.16	0	1	0	0	0	0	0	2852
tRF-49:70-chrM.Trp-TCA	ENSMUST00000003575.9	Tpm4	Coding	Click Me	2	-0.695	314	-52.84	0	1	0	0	1	0	0	1318
tRF-49:70-chrM.Trp-TCA	ENSMUST00000000095.6	Tbx2	Coding	Click Me	1	-0.247	153	-27.4	0	0	0	1	0	0	0	2322
tRF-49:70-chrM.Trp-TCA	ENSMUST00000164267.1	Hcar1	Coding	Click Me	1	-0.197	148	-21.43	0	1	0	0	0	0	0	5313
tRF-49:70-chrM.Trp-TCA	ENSMUST00000034218.4	Slc12a3	Coding	Click Me	1	-0.212	145	-21.96	0	0	0	1	0	0	0	1580
tRF-49:70-chrM.Trp-TCA	ENSMUST00000115441.8	Gtpbp10	Coding	Click Me	1	-0.188	141	-25.78	0	1	0	0	0	0	0	1803
tRF-49:70-chrM.Trp-TCA	ENSMUST00000049064.3	Rap2b	Coding	Click Me	1	-0.229	147	-20.44	0	0	0	1	0	0	0	4867
tRF-49:70-chrM.Trp-TCA	ENSMUST00000079414.11	Cep89	Coding	Click Me	1	-0.181	147	-21.98	0	0	0	0	0	1	0	1264
tRF-49:70-chrM.Trp-TCA	ENSMUST00000014694.10	Rbsn	Coding	Click Me	1	-0.16	151	-22.12	0	0	0	1	0	0	0	4252
tRF-49:70-chrM.Trp-TCA	ENSMUST00000005860.15	Pvalb	Coding	Click Me	1	-0.185	155	-21.96	0	0	0	1	0	0	0	3296
tRF-49:70-chrM.Trp-TCA	ENSMUST00000004208.6	Angptl2	Coding	Click Me	3	-0.763	447	-72.15	0	1	0	1	1	0	0	1953
tRF-49:70-chrM.Trp-TCA	ENSMUST00000180041.8	Stard9	Coding	Click Me	1	-0.222	148	-22.4	0	1	0	0	0	0	0	1844
tRF-49:70-chrM.Trp-TCA	ENSMUST00000058229.5	Rp1l1	Coding	Click Me	1	-0.393	153	-22.9	0	0	0	0	1	0	0	960
tRF-49:70-chrM.Trp-TCA	ENSMUST00000169357.1	Fancf	Coding	Click Me	1	-0.1	146	-21.04	0	1	0	0	0	0	0	4807
tRF-49:70-chrM.Trp-TCA	ENSMUST00000009550.13	Elk1	Coding	Click Me	1	-0.216	146	-21.04	0	1	0	0	0	0	0	2055
tRF-49:70-chrM.Trp-TCA	ENSMUST00000022437.15	Hacl1	Coding	Click Me	1	-0.139	159	-33.42	0	0	1	0	0	0	0	5386
tRF-49:70-chrM.Trp-TCA	ENSMUST00000005620.9	Dnajb1	Coding	Click Me	1	-0.187	166	-27.69	0	0	0	1	0	0	0	1836
tRF-49:70-chrM.Trp-TCA	ENSMUST00000107853.7	Mbtd1	Coding	Click Me	1	-0.112	149	-21.55	0	0	0	1	0	0	0	3095
tRF-49:70-chrM.Trp-TCA	ENSMUST00000001927.11	Ltbp1	Coding	Click Me	1	-0.142	163	-26.44	0	0	0	1	0	0	0	2781
tRF-49:70-chrM.Trp-TCA	ENSMUST00000039152.13	Dhx8	Coding	Click Me	1	-0.16	146	-21.02	0	1	0	0	0	0	0	3190
tRF-49:70-chrM.Trp-TCA	ENSMUST00000032122.10	Tacr1	Coding	Click Me	1	-0.149	152	-18.96	0	0	0	1	0	0	0	2886
tRF-49:70-chrM.Trp-TCA	ENSMUST00000124516.7	Myh1	Coding	Click Me	1	-0.198	141	-27.65	1	0	0	0	0	0	0	1335
tRF-49:70-chrM.Trp-TCA	ENSMUST00000091355.11	Tpd52	Coding	Click Me	1	-0.326	157	-25.24	0	0	0	0	1	0	0	2426
tRF-49:70-chrM.Trp-TCA	ENSMUST00000071419.11	Mroh5	Coding	Click Me	1	-0.412	155	-23.33	0	0	0	0	1	0	0	1294
tRF-49:70-chrM.Trp-TCA	ENSMUST00000209866.3	Olfr5	Coding	Click Me	1	-0.248	159	-24.74	0	0	0	0	0	1	0	1894
tRF-49:70-chrM.Trp-TCA	ENSMUST00000021467.7	Sav1	Coding	Click Me	2	-0.353	302	-43.35	1	0	0	1	0	0	0	1896
tRF-49:70-chrM.Trp-TCA	ENSMUST00000033004.7	Il4ra	Coding	Click Me	1	-0.125	143	-27.1	0	1	0	0	0	0	0	6412
tRF-49:70-chrM.Trp-TCA	ENSMUST00000047762.9	Gata6	Coding	Click Me	1	-0.267	148	-23.82	0	0	1	0	0	0	0	2510
tRF-49:70-chrM.Trp-TCA	ENSMUST00000086023.11	Galnt17	Coding	Click Me	1	-0.207	147	-23.07	0	0	0	1	0	0	0	4346
tRF-49:70-chrM.Trp-TCA	ENSMUST00000147337.7	Mapkap1	Coding	Click Me	1	-0.154	143	-22.44	1	0	0	0	0	0	0	1401
tRF-49:70-chrM.Trp-TCA	ENSMUST00000015628.3	Fam163a	Coding	Click Me	2	-0.596	305	-37.78	0	0	0	1	1	0	0	2941
tRF-49:70-chrM.Trp-TCA	ENSMUST00000035597.9	Sppl2b	Coding	Click Me	1	-0.185	158	-28.27	0	0	0	0	0	1	0	1066
tRF-49:70-chrM.Trp-TCA	ENSMUST00000169345.3	Syn2	Coding	Click Me	1	-0.199	152	-30.6	0	0	0	0	1	0	0	2239
tRF-49:70-chrM.Trp-TCA	ENSMUST00000091420.5	Skida1	Coding	Click Me	2	-0.286	289	-49.4	0	0	0	1	1	0	0	5380
tRF-49:70-chrM.Trp-TCA	ENSMUST00000063166.5	Fam71b	Coding	Click Me	1	-0.22	152	-20.72	0	0	0	1	0	0	0	117
tRF-49:70-chrM.Trp-TCA	ENSMUST00000127208.7	Lrrc14	Coding	Click Me	1	-0.138	171	-33.25	0	0	0	1	0	0	0	3056
tRF-49:70-chrM.Trp-TCA	ENSMUST00000099376.10	Wbp1l	Coding	Click Me	1	-0.222	156	-28.17	0	0	0	0	0	1	0	2663
tRF-49:70-chrM.Trp-TCA	ENSMUST00000031779.16	Calu	Coding	Click Me	2	-0.284	310	-57.14	0	0	0	1	1	0	0	2172
tRF-49:70-chrM.Trp-TCA	ENSMUST00000108218.9	Klhl32	Coding	Click Me	1	-0.154	144	-21.02	0	1	0	0	0	0	0	4831
tRF-49:70-chrM.Trp-TCA	ENSMUST00000033000.7	Il21r	Coding	Click Me	2	-0.259	312	-49.53	0	0	0	1	0	1	0	3050
tRF-49:70-chrM.Trp-TCA	ENSMUST00000046532.3	Gjb3	Coding	Click Me	1	-0.157	153	-29.49	0	0	0	0	0	1	0	690
tRF-49:70-chrM.Trp-TCA	ENSMUST00000035234.5	1700102P08Rik	Coding	Click Me	3	-0.54	457	-81.9	0	0	1	0	1	1	0	5046
tRF-49:70-chrM.Trp-TCA	ENSMUST00000099278.8	Kiz	Coding	Click Me	1	-0.388	167	-28.89	0	0	0	0	1	0	0	653
tRF-49:70-chrM.Trp-TCA	ENSMUST00000034709.5	Bcl2l10	Coding	Click Me	1	-0.147	145	-23.77	0	1	0	0	0	0	0	507
tRF-49:70-chrM.Trp-TCA	ENSMUST00000094452.3	Wscd2	Coding	Click Me	2	-0.478	295	-43.71	0	0	0	1	1	0	0	4248
tRF-49:70-chrM.Trp-TCA	ENSMUST00000030738.7	Utp11	Coding	Click Me	1	-0.202	144	-22.8	0	1	0	0	0	0	0	1629
tRF-49:70-chrM.Trp-TCA	ENSMUST00000037401.9	Phf20	Coding	Click Me	1	-0.35	147	-22.09	0	0	0	0	1	0	0	4432
tRF-49:70-chrM.Trp-TCA	ENSMUST00000057907.9	Fbxo44	Coding	Click Me	1	-0.231	144	-19.34	0	0	0	0	0	1	0	698
tRF-49:70-chrM.Trp-TCA	ENSMUST00000047889.12	Atp1b2	Coding	Click Me	1	-0.198	140	-27.45	0	1	0	0	0	0	0	4425
tRF-49:70-chrM.Trp-TCA	ENSMUST00000003360.9	Car11	Coding	Click Me	1	-0.217	147	-23.43	0	0	0	1	0	0	0	168
tRF-49:70-chrM.Trp-TCA	ENSMUST00000031388.12	Vps33a	Coding	Click Me	1	-0.102	180	-32.23	0	0	0	0	0	1	0	6026
tRF-49:70-chrM.Trp-TCA	ENSMUST00000132298.1	Gm20708	Coding	Click Me	1	-0.101	141	-24.73	0	1	0	0	0	0	0	1703
tRF-49:70-chrM.Trp-TCA	ENSMUST00000065167.8	Grk3	Coding	Click Me	1	-0.15	155	-24.35	0	0	0	1	0	0	0	4455
tRF-49:70-chrM.Trp-TCA	ENSMUST00000052413.11	Lcp2	Coding	Click Me	1	-0.231	168	-29.38	0	0	0	1	0	0	0	1608
tRF-49:70-chrM.Trp-TCA	ENSMUST00000108915.7	Phactr3	Coding	Click Me	1	-0.206	143	-26.52	1	0	0	0	0	0	0	970
tRF-49:70-chrM.Trp-TCA	ENSMUST00000165874.7	Fam78b	Coding	Click Me	1	-0.182	148	-25.18	0	0	0	1	0	0	0	4057
tRF-49:70-chrM.Trp-TCA	ENSMUST00000092430.10	Tfam	Coding	Click Me	1	-0.119	182	-41.44	0	0	0	1	0	0	0	3097
tRF-49:70-chrM.Trp-TCA	ENSMUST00000000080.7	Klf6	Coding	Click Me	1	-0.212	140	-30.2	0	1	0	0	0	0	0	4307
tRF-49:70-chrM.Trp-TCA	ENSMUST00000044532.10	Dock3	Coding	Click Me	1	-0.111	153	-20.08	0	0	0	0	0	1	0	2569
tRF-49:70-chrM.Trp-TCA	ENSMUST00000024905.10	Ralbp1	Coding	Click Me	1	-0.251	148	-28.22	0	0	1	0	0	0	0	1532
tRF-49:70-chrM.Trp-TCA	ENSMUST00000033025.6	Lcmt1	Coding	Click Me	1	-0.178	154	-27.93	0	1	0	0	0	0	0	210
tRF-49:70-chrM.Trp-TCA	ENSMUST00000084527.9	Fkbp15	Coding	Click Me	1	-0.244	162	-20.86	0	0	0	0	0	1	0	2546
tRF-49:70-chrM.Trp-TCA	ENSMUST00000037947.14	Mcl1	Coding	Click Me	1	-0.18	155	-28.19	0	0	0	0	1	0	0	2461
tRF-49:70-chrM.Trp-TCA	ENSMUST00000037540.4	P2ry2	Coding	Click Me	1	-0.162	144	-21.02	0	1	0	0	0	0	0	6515
tRF-49:70-chrM.Trp-TCA	ENSMUST00000093298.11	Spred2	Coding	Click Me	1	-0.196	149	-18.53	0	0	0	1	0	0	0	1130
tRF-49:70-chrM.Trp-TCA	ENSMUST00000197679.4	Il6ra	Coding	Click Me	1	-0.158	160	-24.83	0	0	0	1	0	0	0	7102
tRF-49:70-chrM.Trp-TCA	ENSMUST00000070524.4	Tgoln1	Coding	Click Me	1	-0.126	141	-20.57	0	0	0	0	1	0	0	4613
tRF-49:70-chrM.Trp-TCA	ENSMUST00000073252.8	Chrnd	Coding	Click Me	1	-0.159	149	-31.03	0	0	0	0	0	1	0	1308
tRF-49:70-chrM.Trp-TCA	ENSMUST00000031367.14	Slc15a4	Coding	Click Me	1	-0.262	160	-22.68	0	0	0	1	0	0	0	7897
tRF-49:70-chrM.Trp-TCA	ENSMUST00000115016.7	Agbl3	Coding	Click Me	1	-0.152	162	-28.87	0	0	0	0	0	1	0	3034
tRF-49:70-chrM.Trp-TCA	ENSMUST00000169256.4	D630045J12Rik	Coding	Click Me	1	-0.128	156	-27.67	0	0	0	1	0	0	0	5145
tRF-49:70-chrM.Trp-TCA	ENSMUST00000028928.7	Gzf1	Coding	Click Me	2	-0.297	318	-50.95	0	0	0	0	1	1	0	3699
tRF-49:70-chrM.Trp-TCA	ENSMUST00000049488.8	Serinc5	Coding	Click Me	2	-0.387	301	-47.62	0	0	0	1	1	0	0	3963
tRF-49:70-chrM.Trp-TCA	ENSMUST00000228498.1	Vmn1r34	Coding	Click Me	1	-0.243	140	-19.28	0	1	0	0	0	0	0	887
tRF-49:70-chrM.Trp-TCA	ENSMUST00000090046.11	Tmem87a	Coding	Click Me	1	-0.421	162	-27.59	0	0	0	0	1	0	0	1188
tRF-49:70-chrM.Trp-TCA	ENSMUST00000018577.7	Nol11	Coding	Click Me	1	-0.215	143	-22.57	0	0	0	1	0	0	0	862
tRF-49:70-chrM.Trp-TCA	ENSMUST00000085553.12	Grhl1	Coding	Click Me	1	-0.186	140	-23.25	1	0	0	0	0	0	0	1456
tRF-49:70-chrM.Trp-TCA	ENSMUST00000033380.6	Cdk16	Coding	Click Me	1	-0.292	150	-28.22	0	0	1	0	0	0	0	1234
tRF-49:70-chrM.Trp-TCA	ENSMUST00000199754.4	Gatad2b	Coding	Click Me	1	-0.228	147	-24.47	0	0	0	0	1	0	0	5405
tRF-49:70-chrM.Trp-TCA	ENSMUST00000030158.10	Dctn3	Coding	Click Me	1	-0.202	162	-31.2	0	0	0	1	0	0	0	377
tRF-49:70-chrM.Trp-TCA	ENSMUST00000108825.1	Gm12253	Coding	Click Me	1	-0.25	148	-23.43	0	0	0	0	0	1	0	566
tRF-49:70-chrM.Trp-TCA	ENSMUST00000008733.14	Dnajb6	Coding	Click Me	1	-0.239	157	-24.32	0	0	0	0	1	0	0	3857
tRF-49:70-chrM.Trp-TCA	ENSMUST00000027986.4	Optn	Coding	Click Me	1	-0.35	156	-22.5	0	0	0	0	1	0	0	2808
tRF-49:70-chrM.Trp-TCA	ENSMUST00000073371.6	Cpped1	Coding	Click Me	2	-0.361	302	-46.5	0	0	0	1	0	1	0	2477
tRF-49:70-chrM.Trp-TCA	ENSMUST00000010286.7	Tnfrsf13b	Coding	Click Me	1	-0.233	148	-21.38	0	0	0	0	0	1	0	1736
tRF-49:70-chrM.Trp-TCA	ENSMUST00000034941.8	Plscr4	Coding	Click Me	1	-0.323	152	-22.85	0	0	0	0	1	0	0	2710
tRF-49:70-chrM.Trp-TCA	ENSMUST00000115477.7	Foxp2	Coding	Click Me	1	-0.156	161	-31.54	0	0	0	0	1	0	0	4719
tRF-49:70-chrM.Trp-TCA	ENSMUST00000209421.1	Best2	Coding	Click Me	1	-0.198	168	-31.65	0	0	0	0	0	1	0	359
tRF-49:70-chrM.Trp-TCA	ENSMUST00000225839.1	Cdadc1	Coding	Click Me	1	-0.196	141	-21.5	0	0	0	1	0	0	0	1508
tRF-49:70-chrM.Trp-TCA	ENSMUST00000035779.14	Acsl3	Coding	Click Me	1	-0.138	141	-17.91	0	0	0	1	0	0	0	1352
tRF-49:70-chrM.Trp-TCA	ENSMUST00000023760.12	Gpd1	Coding	Click Me	1	-0.174	150	-26.89	0	0	0	1	0	0	0	1837
tRF-49:70-chrM.Trp-TCA	ENSMUST00000036934.11	Neb	Coding	Click Me	1	-0.292	154	-20.23	0	0	0	1	0	0	0	815
tRF-49:70-chrM.Trp-TCA	ENSMUST00000056157.13	Mlkl	Coding	Click Me	1	-0.105	148	-22.06	0	1	0	0	0	0	0	5151
tRF-49:70-chrM.Trp-TCA	ENSMUST00000063750.7	Rarb	Coding	Click Me	1	-0.193	152	-24.58	0	0	0	1	0	0	0	1288
tRF-49:70-chrM.Trp-TCA	ENSMUST00000179347.2	Gm3336	Coding	Click Me	1	-0.202	150	-21.67	0	0	0	0	0	1	0	544
tRF-49:70-chrM.Trp-TCA	ENSMUST00000016907.7	Scube1	Coding	Click Me	1	-0.118	140	-27.4	0	1	0	0	0	0	0	819
tRF-49:70-chrM.Trp-TCA	ENSMUST00000164918.2	Vmn2r52	Coding	Click Me	1	-0.293	157	-28.61	0	0	0	1	0	0	0	5446
tRF-49:70-chrM.Trp-TCA	ENSMUST00000054002.3	Socs3	Coding	Click Me	1	-0.168	141	-20.73	0	1	0	0	0	0	0	1474
tRF-49:70-chrM.Trp-TCA	ENSMUST00000051633.2	Ubiad1	Coding	Click Me	1	-0.411	151	-28.46	0	0	1	0	0	0	0	4976
tRF-49:70-chrM.Trp-TCA	ENSMUST00000204059.2	Add2	Coding	Click Me	1	-0.235	152	-28.38	0	0	0	1	0	0	0	5628
tRF-49:70-chrM.Trp-TCA	ENSMUST00000034463.3	Arv1	Coding	Click Me	1	-0.154	144	-25.9	0	1	0	0	0	0	0	5011
tRF-49:70-chrM.Trp-TCA	ENSMUST00000188371.6	Terf1	Coding	Click Me	2	-0.225	314	-49.83	0	1	0	0	0	1	0	5354
tRF-49:70-chrM.Trp-TCA	ENSMUST00000126319.7	Tbl3	Coding	Click Me	1	-0.157	149	-27.53	0	1	0	0	0	0	0	2724
tRF-49:70-chrM.Trp-TCA	ENSMUST00000233717.1	Rab44	Coding	Click Me	2	-0.52	306	-45.89	0	0	0	2	0	0	0	705
tRF-49:70-chrM.Trp-TCA	ENSMUST00000216063.1	Zfp445	Coding	Click Me	1	-0.156	154	-27.69	0	1	0	0	0	0	0	3004
tRF-49:70-chrM.Trp-TCA	ENSMUST00000203566.2	Myadm	Coding	Click Me	1	-0.192	156	-22.14	0	0	0	0	0	1	0	2756
tRF-49:70-chrM.Trp-TCA	ENSMUST00000005678.5	Fcer2a	Coding	Click Me	2	-0.57	299	-47.58	0	1	0	0	1	0	0	1073
tRF-49:70-chrM.Trp-TCA	ENSMUST00000169982.1	Dnajc28	Coding	Click Me	2	-0.378	294	-44.56	0	1	0	0	0	1	0	2998
tRF-49:70-chrM.Trp-TCA	ENSMUST00000156326.1	Tmub2	Coding	Click Me	1	-0.134	140	-26.76	0	1	0	0	0	0	0	801
tRF-49:70-chrM.Trp-TCA	ENSMUST00000028256.4	Morn5	Coding	Click Me	1	-0.428	150	-26.74	0	0	0	0	1	0	0	130
tRF-49:70-chrM.Trp-TCA	ENSMUST00000029131.10	Ggt7	Coding	Click Me	1	-0.129	145	-22.69	0	0	0	1	0	0	0	5048
tRF-49:70-chrM.Trp-TCA	ENSMUST00000044019.15	Slc41a3	Coding	Click Me	1	-0.378	146	-25.23	0	0	1	0	0	0	0	631
tRF-49:70-chrM.Trp-TCA	ENSMUST00000094004.4	Abhd15	Coding	Click Me	1	-0.103	145	-24.62	0	1	0	0	0	0	0	3934
tRF-49:70-chrM.Trp-TCA	ENSMUST00000078257.6	D130040H23Rik	Coding	Click Me	3	-0.428	446	-71.41	0	1	0	0	2	0	0	16501
tRF-49:70-chrM.Trp-TCA	ENSMUST00000200633.1	Dnase2b	Coding	Click Me	1	-0.282	162	-22.08	0	0	0	1	0	0	0	1289
tRF-49:70-chrM.Trp-TCA	ENSMUST00000217437.1	Olfr742	Coding	Click Me	1	-0.263	157	-23.7	0	0	0	1	0	0	0	1004
tRF-49:70-chrM.Trp-TCA	ENSMUST00000107505.7	Syt11	Coding	Click Me	1	-0.129	140	-20.04	0	0	0	1	0	0	0	3000
tRF-49:70-chrM.Trp-TCA	ENSMUST00000027684.10	Arl8a	Coding	Click Me	1	-0.147	147	-21.67	0	0	0	0	0	1	0	1012
tRF-49:70-chrM.Trp-TCA	ENSMUST00000020668.14	Havcr2	Coding	Click Me	2	-0.289	288	-41.28	0	2	0	0	0	0	0	3872
tRF-49:70-chrM.Trp-TCA	ENSMUST00000034508.13	Usp2	Coding	Click Me	1	-0.15	157	-25.21	0	0	0	1	0	0	0	1766
tRF-49:70-chrM.Trp-TCA	ENSMUST00000108821.7	2210407C18Rik	Coding	Click Me	1	-0.135	141	-21.69	0	1	0	0	0	0	0	888
tRF-49:70-chrM.Trp-TCA	ENSMUST00000028123.3	Gad2	Coding	Click Me	1	-0.191	144	-21.02	0	1	0	0	0	0	0	3531
tRF-49:70-chrM.Trp-TCA	ENSMUST00000103217.10	Pex14	Coding	Click Me	1	-0.217	167	-29.83	0	0	0	1	0	0	0	5276
tRF-49:70-chrM.Trp-TCA	ENSMUST00000087122.11	Speg	Coding	Click Me	1	-0.138	156	-27.05	0	0	0	0	1	0	0	3973
tRF-49:70-chrM.Trp-TCA	ENSMUST00000113470.2	Prdm12	Coding	Click Me	2	-0.516	294	-54.19	0	0	1	1	0	0	0	1311
tRF-49:70-chrM.Trp-TCA	ENSMUST00000042732.5	Fbxo45	Coding	Click Me	1	-0.401	149	-24.39	0	0	0	0	1	0	0	2976
tRF-49:70-chrM.Trp-TCA	ENSMUST00000167588.8	Trim67	Coding	Click Me	1	-0.25	152	-22.91	0	0	0	1	0	0	0	5619
tRF-49:70-chrM.Trp-TCA	ENSMUST00000044021.11	Slc19a2	Coding	Click Me	1	-0.167	145	-22.38	0	0	0	1	0	0	0	1868
tRF-49:70-chrM.Trp-TCA	ENSMUST00000215806.1	Olfr1370	Coding	Click Me	1	-0.234	164	-22.93	0	0	0	0	0	1	0	3015
tRF-49:70-chrM.Trp-TCA	ENSMUST00000041643.3	Pcif1	Coding	Click Me	1	-0.418	143	-23.78	0	0	1	0	0	0	0	3338
tRF-49:70-chrM.Trp-TCA	ENSMUST00000037315.12	Abhd2	Coding	Click Me	1	-0.131	142	-22.85	0	0	0	1	0	0	0	5356
tRF-49:70-chrM.Trp-TCA	ENSMUST00000010348.6	Fdx1l	Coding	Click Me	1	-0.456	157	-24.77	0	0	0	0	1	0	0	258
tRF-49:70-chrM.Trp-TCA	ENSMUST00000011029.11	Dnajc19	Coding	Click Me	2	-0.404	304	-41.97	0	0	0	1	0	1	0	3589
tRF-49:70-chrM.Trp-TCA	ENSMUST00000122328.7	Pxdn	Coding	Click Me	1	-0.144	142	-22.28	0	0	0	0	0	0	1	2108
tRF-49:70-chrM.Trp-TCA	ENSMUST00000021843.12	Nqo2	Coding	Click Me	1	-0.285	149	-18.55	0	0	0	1	0	0	0	2973
tRF-49:70-chrM.Trp-TCA	ENSMUST00000097542.2	Cep76	Coding	Click Me	1	-0.122	150	-23.21	0	1	0	0	0	0	0	2860
tRF-49:70-chrM.Trp-TCA	ENSMUST00000035079.9	Mlh1	Coding	Click Me	1	-0.116	144	-26.46	0	1	0	0	0	0	0	2506
tRF-49:70-chrM.Trp-TCA	ENSMUST00000106582.8	Cd300a	Coding	Click Me	1	-0.175	144	-19.51	0	0	0	0	0	1	0	3364
tRF-49:70-chrM.Trp-TCA	ENSMUST00000160899.7	B3gat1	Coding	Click Me	1	-0.182	140	-19.78	0	1	0	0	0	0	0	2216
tRF-49:70-chrM.Trp-TCA	ENSMUST00000059362.2	Synb	Coding	Click Me	1	-0.294	140	-26.59	0	0	1	0	0	0	0	1603
tRF-49:70-chrM.Trp-TCA	ENSMUST00000186485.6	Pign	Coding	Click Me	1	-0.113	144	-22.17	1	0	0	0	0	0	0	3578
tRF-49:70-chrM.Trp-TCA	ENSMUST00000046941.7	Rnf122	Coding	Click Me	1	-0.125	152	-29.3	0	1	0	0	0	0	0	4627
tRF-49:70-chrM.Trp-TCA	ENSMUST00000048781.3	Pck2	Coding	Click Me	1	-0.299	144	-23.14	0	0	1	0	0	0	0	4941
tRF-49:70-chrM.Trp-TCA	ENSMUST00000047331.7	Lgi3	Coding	Click Me	1	-0.395	150	-31.42	0	0	0	0	1	0	0	5873
tRF-49:70-chrM.Trp-TCA	ENSMUST00000081162.5	Homez	Coding	Click Me	2	-0.283	304	-52.89	0	1	0	0	1	0	0	4815
tRF-49:70-chrM.Trp-TCA	ENSMUST00000069476.4	Rtl6	Coding	Click Me	2	-0.411	300	-43.79	0	0	0	1	1	0	0	3083
tRF-49:70-chrM.Trp-TCA	ENSMUST00000025925.10	Pla2g16	Coding	Click Me	1	-0.341	152	-22.95	0	0	1	0	0	0	0	2879
tRF-49:70-chrM.Trp-TCA	ENSMUST00000060435.6	Selenon	Coding	Click Me	1	-0.157	156	-28.78	0	0	0	1	0	0	0	1724
tRF-49:70-chrM.Trp-TCA	ENSMUST00000144548.8	Mfsd4a	Coding	Click Me	4	-0.735	572	-100.32	0	0	4	0	0	0	0	1678
tRF-49:70-chrM.Trp-TCA	ENSMUST00000163075.7	Pip5k1c	Coding	Click Me	2	-0.446	325	-52.87	0	0	0	1	1	0	0	2204
tRF-49:70-chrM.Trp-TCA	ENSMUST00000027824.6	Apcs	Coding	Click Me	1	-0.292	149	-20.13	0	0	0	1	0	0	0	1139
tRF-49:70-chrM.Trp-TCA	ENSMUST00000100392.4	BC030867	Coding	Click Me	1	-0.146	165	-30.79	0	0	0	0	0	1	0	826
tRF-49:70-chrM.Trp-TCA	ENSMUST00000170677.7	Rcbtb2	Coding	Click Me	1	-0.351	142	-23.39	0	0	0	0	1	0	0	1448
tRF-49:70-chrM.Trp-TCA	ENSMUST00000178545.2	Tmem200c	Coding	Click Me	1	-0.278	152	-21.76	0	0	0	0	0	1	0	802
tRF-49:70-chrM.Trp-TCA	ENSMUST00000033991.12	Wrn	Coding	Click Me	1	-0.319	144	-25.26	0	0	1	0	0	0	0	1964
tRF-49:70-chrM.Trp-TCA	ENSMUST00000029541.11	Slc27a3	Coding	Click Me	1	-0.417	160	-28.88	0	0	0	0	1	0	0	141
tRF-49:70-chrM.Trp-TCA	ENSMUST00000048016.2	Fut11	Coding	Click Me	1	-0.226	147	-18.37	0	1	0	0	0	0	0	2656
tRF-49:70-chrM.Trp-TCA	ENSMUST00000036426.12	Prss35	Coding	Click Me	1	-0.263	140	-18.69	0	1	0	0	0	0	0	2035
tRF-49:70-chrM.Trp-TCA	ENSMUST00000025684.3	Ehd1	Coding	Click Me	1	-0.133	144	-21.02	0	1	0	0	0	0	0	3434
tRF-49:70-chrM.Trp-TCA	ENSMUST00000228075.2	Zfp870	Coding	Click Me	2	-0.574	289	-40.08	0	1	0	0	1	0	0	3452
tRF-49:70-chrM.Trp-TCA	ENSMUST00000107252.8	Ptges3l	Coding	Click Me	1	-0.171	141	-20.65	0	1	0	0	0	0	0	1482
tRF-49:70-chrM.Trp-TCA	ENSMUST00000179297.2	Prpf19	Coding	Click Me	1	-0.217	142	-25.07	0	0	1	0	0	0	0	4427
tRF-49:70-chrM.Trp-TCA	ENSMUST00000019701.8	Dusp9	Coding	Click Me	1	-0.19	140	-23.92	1	0	0	0	0	0	0	1105
tRF-49:70-chrM.Trp-TCA	ENSMUST00000034458.8	Galnt2	Coding	Click Me	2	-0.319	318	-59.94	0	0	0	0	1	1	0	2265
tRF-49:70-chrM.Trp-TCA	ENSMUST00000159861.8	Pappa2	Coding	Click Me	2	-0.487	292	-41.75	0	0	1	0	0	1	0	3219
tRF-49:70-chrM.Trp-TCA	ENSMUST00000093040.12	Rab4b	Coding	Click Me	1	-0.173	146	-19.04	0	0	0	1	0	0	0	1863
tRF-49:70-chrM.Trp-TCA	ENSMUST00000099696.7	Cd82	Coding	Click Me	1	-0.405	147	-18.8	0	0	0	0	1	0	0	5220
tRF-49:70-chrM.Trp-TCA	ENSMUST00000088174.3	Hs6st1	Coding	Click Me	1	-0.116	141	-25.17	0	0	1	0	0	0	0	2225
tRF-49:70-chrM.Trp-TCA	ENSMUST00000129449.2	Tmem170b	Coding	Click Me	1	-0.16	141	-24.67	1	0	0	0	0	0	0	6771
tRF-49:70-chrM.Trp-TCA	ENSMUST00000109237.8	Itk	Coding	Click Me	1	-0.243	140	-18.09	0	0	0	0	0	1	0	2307
tRF-49:70-chrM.Trp-TCA	ENSMUST00000032065.14	Pcyox1	Coding	Click Me	1	-0.155	144	-21.02	0	1	0	0	0	0	0	4874
tRF-49:70-chrM.Trp-TCA	ENSMUST00000038091.7	Sde2	Coding	Click Me	1	-0.288	140	-18.15	0	0	0	0	1	0	0	1821
tRF-49:70-chrM.Trp-TCA	ENSMUST00000098084.10	Acsm2	Coding	Click Me	1	-0.17	163	-27.58	0	0	0	1	0	0	0	4685
tRF-49:70-chrM.Trp-TCA	ENSMUST00000107689.6	Fhdc1	Coding	Click Me	1	-0.136	141	-22.51	0	1	0	0	0	0	0	2269
tRF-49:70-chrM.Trp-TCA	uc008nwo.1	AK015392	Coding	Click Me	1	-0.214	144	-21.02	0	1	0	0	0	0	0	1114
tRF-49:70-chrM.Trp-TCA	ENSMUST00000115222.9	Zbtb44	Coding	Click Me	1	-0.11	156	-26.94	0	0	0	0	0	1	0	7130
tRF-49:70-chrM.Trp-TCA	ENSMUST00000112885.8	Dzip1l	Coding	Click Me	3	-0.55	467	-73.12	0	0	0	3	0	0	0	1453
tRF-49:70-chrM.Trp-TCA	ENSMUST00000035988.15	Txndc5	Coding	Click Me	1	-0.247	143	-22.48	0	0	0	0	1	0	0	1533
tRF-49:70-chrM.Trp-TCA	ENSMUST00000024887.5	Ndufaf7	Coding	Click Me	1	-0.208	144	-21.02	0	1	0	0	0	0	0	4573
tRF-49:70-chrM.Trp-TCA	ENSMUST00000178134.1	Mdn1	Coding	Click Me	1	-0.231	159	-22.54	0	0	0	1	0	0	0	4579
tRF-49:70-chrM.Trp-TCA	ENSMUST00000113914.7	Pigp	Coding	Click Me	2	-0.501	302	-44.01	0	0	0	2	0	0	0	1217
tRF-49:70-chrM.Trp-TCA	ENSMUST00000092048.12	Naca	Coding	Click Me	2	-0.329	293	-45.79	0	2	0	0	0	0	0	2292
tRF-49:70-chrM.Trp-TCA	ENSMUST00000109485.8	Ralgapb	Coding	Click Me	1	-0.205	140	-24.59	0	0	1	0	0	0	0	2002
tRF-49:70-chrM.Trp-TCA	ENSMUST00000060226.10	Tmed2	Coding	Click Me	1	-0.147	143	-25.18	0	0	0	0	0	1	0	1663
tRF-49:70-chrM.Trp-TCA	ENSMUST00000033464.3	Brs3	Coding	Click Me	1	-0.143	174	-30.59	0	0	0	1	0	0	0	1401
tRF-49:70-chrM.Trp-TCA	ENSMUST00000027432.8	Psmd1	Coding	Click Me	1	-0.105	144	-21.02	0	1	0	0	0	0	0	3251
tRF-49:70-chrM.Trp-TCA	ENSMUST00000117276.9	Slc39a3	Coding	Click Me	1	-0.182	144	-23.78	0	1	0	0	0	0	0	2421
tRF-49:70-chrM.Trp-TCA	ENSMUST00000138603.8	Hap1	Coding	Click Me	1	-0.112	145	-30.21	0	1	0	0	0	0	0	1378
tRF-49:70-chrM.Trp-TCA	ENSMUST00000169850.7	Gfra1	Coding	Click Me	1	-0.141	140	-21.05	0	1	0	0	0	0	0	1699
tRF-49:70-chrM.Trp-TCA	ENSMUST00000168698.1	Cotl1	Coding	Click Me	3	-0.741	457	-82.93	0	2	0	0	1	0	0	974
tRF-49:70-chrM.Trp-TCA	ENSMUST00000081989.7	Rnf217	Coding	Click Me	2	-0.396	304	-41.73	0	0	0	1	1	0	0	9478
tRF-49:70-chrM.Trp-TCA	ENSMUST00000021083.6	Jpt1	Coding	Click Me	1	-0.285	150	-19.19	0	0	0	0	0	1	0	808
tRF-49:70-chrM.Trp-TCA	ENSMUST00000048565.8	Trim60	Coding	Click Me	1	-0.4	147	-20.7	0	0	0	0	1	0	0	1747
tRF-49:70-chrM.Trp-TCA	ENSMUST00000045372.5	Bpgm	Coding	Click Me	2	-0.394	303	-50.43	0	0	0	0	0	2	0	2646
tRF-49:70-chrM.Trp-TCA	ENSMUST00000020655.13	Jade2	Coding	Click Me	1	-0.154	153	-31.18	0	0	0	0	0	1	0	3453
tRF-49:70-chrM.Trp-TCA	ENSMUST00000032811.11	Rasgrp4	Coding	Click Me	2	-0.53	302	-51.24	0	0	0	0	2	0	0	2459
tRF-49:70-chrM.Trp-TCA	ENSMUST00000002855.13	Kdelr1	Coding	Click Me	1	-0.109	140	-26.17	0	1	0	0	0	0	0	2485
tRF-49:70-chrM.Trp-TCA	ENSMUST00000052832.5	2410015M20Rik	Coding	Click Me	1	-0.289	155	-24.6	0	0	0	1	0	0	0	1469
tRF-49:70-chrM.Trp-TCA	ENSMUST00000100528.4	Ube2z	Coding	Click Me	1	-0.162	141	-27.7	0	1	0	0	0	0	0	2816
tRF-49:70-chrM.Trp-TCA	ENSMUST00000125704.7	Fam241b	Coding	Click Me	1	-0.38	141	-24.47	0	0	0	0	1	0	0	1199
tRF-49:70-chrM.Trp-TCA	ENSMUST00000022561.7	Amer2	Coding	Click Me	1	-0.186	156	-24.23	0	0	0	1	0	0	0	7945
tRF-49:70-chrM.Trp-TCA	ENSMUST00000025924.2	Spindoc	Coding	Click Me	1	-0.265	163	-22.01	0	0	0	1	0	0	0	2799
tRF-49:70-chrM.Trp-TCA	ENSMUST00000171427.7	Grm6	Coding	Click Me	1	-0.109	144	-25.51	0	1	0	0	0	0	0	1550
tRF-49:70-chrM.Trp-TCA	ENSMUST00000023044.6	Fam83f	Coding	Click Me	3	-1.066	474	-89.96	0	1	0	0	2	0	0	1834
tRF-49:70-chrM.Trp-TCA	ENSMUST00000106657.7	Zfyve9	Coding	Click Me	3	-0.75	447	-72.24	0	1	1	1	0	0	0	5139
tRF-49:70-chrM.Trp-TCA	ENSMUST00000052441.11	Slc17a5	Coding	Click Me	1	-0.255	150	-23.51	0	0	0	0	1	0	0	1676
tRF-49:70-chrM.Trp-TCA	ENSMUST00000073691.4	Lima1	Coding	Click Me	1	-0.188	145	-23.2	0	1	0	0	0	0	0	1827
tRF-49:70-chrM.Trp-TCA	ENSMUST00000099841.3	Olfr1157	Coding	Click Me	1	-0.344	160	-21.75	0	0	0	1	0	0	0	3467
tRF-49:70-chrM.Trp-TCA	ENSMUST00000130916.7	Becn1	Coding	Click Me	1	-0.1	148	-21.8	0	1	0	0	0	0	0	2862
tRF-49:70-chrM.Trp-TCA	ENSMUST00000035242.8	Rab24	Coding	Click Me	1	-0.253	147	-21.89	0	0	0	1	0	0	0	1588
tRF-49:70-chrM.Trp-TCA	ENSMUST00000020278.5	Tacr2	Coding	Click Me	3	-0.436	441	-77.03	1	0	1	0	1	0	0	3580
tRF-49:70-chrM.Trp-TCA	ENSMUST00000020399.5	Cpm	Coding	Click Me	1	-0.248	148	-21.99	0	1	0	0	0	0	0	3832
tRF-49:70-chrM.Trp-TCA	ENSMUST00000035822.1	Calhm2	Coding	Click Me	1	-0.169	145	-20.79	0	0	0	1	0	0	0	1644
tRF-49:70-chrM.Trp-TCA	ENSMUST00000020057.15	Lin7a	Coding	Click Me	1	-0.369	142	-21.69	0	0	1	0	0	0	0	5155
tRF-49:70-chrM.Trp-TCA	ENSMUST00000022230.14	Srek1ip1	Coding	Click Me	1	-0.128	140	-21.71	0	1	0	0	0	0	0	5192
tRF-49:70-chrM.Trp-TCA	ENSMUST00000034552.7	Fdx1	Coding	Click Me	1	-0.261	154	-25.98	0	0	0	0	1	0	0	2784
tRF-49:70-chrM.Trp-TCA	ENSMUST00000022916.12	Lrp12	Coding	Click Me	1	-0.212	145	-17.52	0	1	0	0	0	0	0	3074
tRF-49:70-chrM.Trp-TCA	ENSMUST00000105894.10	Rps6ka1	Coding	Click Me	1	-0.374	152	-25.04	0	0	0	0	1	0	0	769
tRF-49:70-chrM.Trp-TCA	ENSMUST00000114836.8	Tcp11	Coding	Click Me	1	-0.231	159	-24.23	0	0	0	1	0	0	0	191
tRF-49:70-chrM.Trp-TCA	ENSMUST00000108476.7	Ctns	Coding	Click Me	1	-0.221	140	-21.58	0	0	0	0	0	1	0	1321
tRF-49:70-chrM.Trp-TCA	ENSMUST00000205034.2	Add2	Coding	Click Me	1	-0.187	151	-23.23	0	0	0	1	0	0	0	1383
tRF-49:70-chrM.Trp-TCA	ENSMUST00000071134.3	Tubb3	Coding	Click Me	1	-0.169	140	-23.34	0	1	0	0	0	0	0	4688
tRF-49:70-chrM.Trp-TCA	ENSMUST00000102975.9	Mob3b	Coding	Click Me	1	-0.3	149	-26.44	0	0	0	0	1	0	0	4944
tRF-49:70-chrM.Trp-TCA	ENSMUST00000023159.9	Mgrn1	Coding	Click Me	1	-0.23	148	-29.49	0	0	1	0	0	0	0	1287
tRF-49:70-chrM.Trp-TCA	ENSMUST00000051377.14	Dpy19l3	Coding	Click Me	1	-0.134	148	-27.32	0	1	0	0	0	0	0	5616
tRF-49:70-chrM.Trp-TCA	ENSMUST00000070575.13	Csnk1d	Coding	Click Me	1	-0.107	141	-26.82	0	1	0	0	0	0	0	4932
tRF-49:70-chrM.Trp-TCA	ENSMUST00000073109.11	Ctdspl	Coding	Click Me	1	-0.102	152	-21.98	0	0	0	0	1	0	0	3985
tRF-49:70-chrM.Trp-TCA	ENSMUST00000169652.2	Tifab	Coding	Click Me	2	-0.273	316	-52.83	0	0	0	2	0	0	0	5093
tRF-49:70-chrM.Trp-TCA	ENSMUST00000022803.5	Psmb5	Coding	Click Me	1	-0.188	144	-21.02	0	1	0	0	0	0	0	4579
tRF-49:70-chrM.Trp-TCA	ENSMUST00000048452.5	Plvap	Coding	Click Me	1	-0.115	170	-34.84	0	0	0	1	0	0	0	2352
tRF-49:70-chrM.Trp-TCA	ENSMUST00000025497.6	Fbn2	Coding	Click Me	1	-0.136	147	-21.39	0	0	0	1	0	0	0	1658
tRF-49:70-chrM.Trp-TCA	ENSMUST00000170513.2	Il12b	Coding	Click Me	1	-0.301	151	-18.71	0	0	0	1	0	0	0	774
tRF-49:70-chrM.Trp-TCA	ENSMUST00000100330.9	Tanc2	Coding	Click Me	1	-0.439	146	-22.8	0	0	0	0	1	0	0	5588
tRF-49:70-chrM.Trp-TCA	ENSMUST00000114007.7	Cacfd1	Coding	Click Me	1	-0.173	140	-28.45	0	0	1	0	0	0	0	2608
tRF-49:70-chrM.Trp-TCA	ENSMUST00000020643.3	Rufy1	Coding	Click Me	1	-0.161	140	-19.28	0	1	0	0	0	0	0	1515
tRF-49:70-chrM.Trp-TCA	ENSMUST00000026092.8	3110040N11Rik	Coding	Click Me	1	-0.122	144	-21.02	0	1	0	0	0	0	0	3526
tRF-49:70-chrM.Trp-TCA	ENSMUST00000053734.5	Duox2	Coding	Click Me	1	-0.374	142	-31.02	0	0	1	0	0	0	0	1192
tRF-49:70-chrM.Trp-TCA	ENSMUST00000060673.7	Liph	Coding	Click Me	1	-0.11	162	-22.15	0	0	0	1	0	0	0	2273
tRF-49:70-chrM.Trp-TCA	ENSMUST00000002091.5	Bcap31	Coding	Click Me	1	-0.137	144	-21.02	0	1	0	0	0	0	0	2649
tRF-49:70-chrM.Trp-TCA	ENSMUST00000115859.7	1700037C18Rik	Coding	Click Me	2	-0.403	308	-46.77	0	1	0	0	1	0	0	1850
tRF-49:70-chrM.Trp-TCA	ENSMUST00000040188.14	Ska1	Coding	Click Me	1	-0.137	142	-28.08	0	1	0	0	0	0	0	1608
tRF-49:70-chrM.Trp-TCA	ENSMUST00000190665.1	Xrn1	Coding	Click Me	1	-0.108	150	-16.02	0	0	0	1	0	0	0	4907
tRF-49:70-chrM.Trp-TCA	ENSMUST00000039074.12	Shank3	Coding	Click Me	1	-0.102	142	-19.25	0	0	0	1	0	0	0	1938
tRF-49:70-chrM.Trp-TCA	ENSMUST00000114317.9	Grin1	Coding	Click Me	1	-0.351	156	-29.7	0	0	0	0	1	0	0	879
tRF-49:70-chrM.Trp-TCA	ENSMUST00000027559.7	Tnfrsf11a	Coding	Click Me	1	-0.231	158	-24.36	0	1	0	0	0	0	0	3655
tRF-49:70-chrM.Trp-TCA	ENSMUST00000155998.1	Ankfy1	Coding	Click Me	1	-0.181	140	-24.35	1	0	0	0	0	0	0	4501
tRF-49:70-chrM.Trp-TCA	ENSMUST00000105421.9	Specc1l	Coding	Click Me	2	-0.465	311	-59.6	0	0	0	1	1	0	0	2864
tRF-49:70-chrM.Trp-TCA	ENSMUST00000027247.10	Pdcl3	Coding	Click Me	1	-0.164	149	-22.21	0	1	0	0	0	0	0	1117
tRF-49:70-chrM.Trp-TCA	ENSMUST00000020277.8	Hkdc1	Coding	Click Me	2	-0.708	317	-59.75	0	0	0	0	2	0	0	1008
tRF-49:70-chrM.Trp-TCA	ENSMUST00000114849.2	Uhrf1bp1	Coding	Click Me	1	-0.122	159	-24.27	0	0	0	1	0	0	0	4052
tRF-49:70-chrM.Trp-TCA	ENSMUST00000030642.2	Psmb2	Coding	Click Me	1	-0.491	150	-29.01	0	0	0	0	1	0	0	964
tRF-49:70-chrM.Trp-TCA	ENSMUST00000139582.8	Usp35	Coding	Click Me	1	-0.1	145	-28.12	0	1	0	0	0	0	0	952
tRF-49:70-chrM.Trp-TCA	ENSMUST00000030296.8	Txndc12	Coding	Click Me	1	-0.275	156	-21.72	0	0	0	1	0	0	0	1205
tRF-49:70-chrM.Trp-TCA	ENSMUST00000016323.10	Camk1g	Coding	Click Me	1	-0.131	160	-23.75	0	0	0	1	0	0	0	879
tRF-49:70-chrM.Trp-TCA	ENSMUST00000032425.6	Emc3	Coding	Click Me	1	-0.212	148	-23.49	0	0	0	0	1	0	0	1907
tRF-49:70-chrM.Trp-TCA	ENSMUST00000165684.7	Med16	Coding	Click Me	1	-0.222	144	-21.02	0	1	0	0	0	0	0	349
tRF-49:70-chrM.Trp-TCA	ENSMUST00000037828.7	Ldlrap1	Coding	Click Me	1	-0.166	148	-19.67	0	0	0	0	0	1	0	6934
[truncated: 9,081 more rows]
